# Supplementary material for: Human embryonic stem cell-derived neural crest model unveils CD55 as a cancer stem cell regulator for therapeutic targeting in MYCN-amplified neuroblastoma
Source: PubMed Central journal article supplement — Neuro Oncol. 2021 Oct 16;24(6):872–85. doi: 10.1093/neuonc/noab241 (PMC9159429; doi:10.1093/neuonc/noab241), 2021-10-16

A

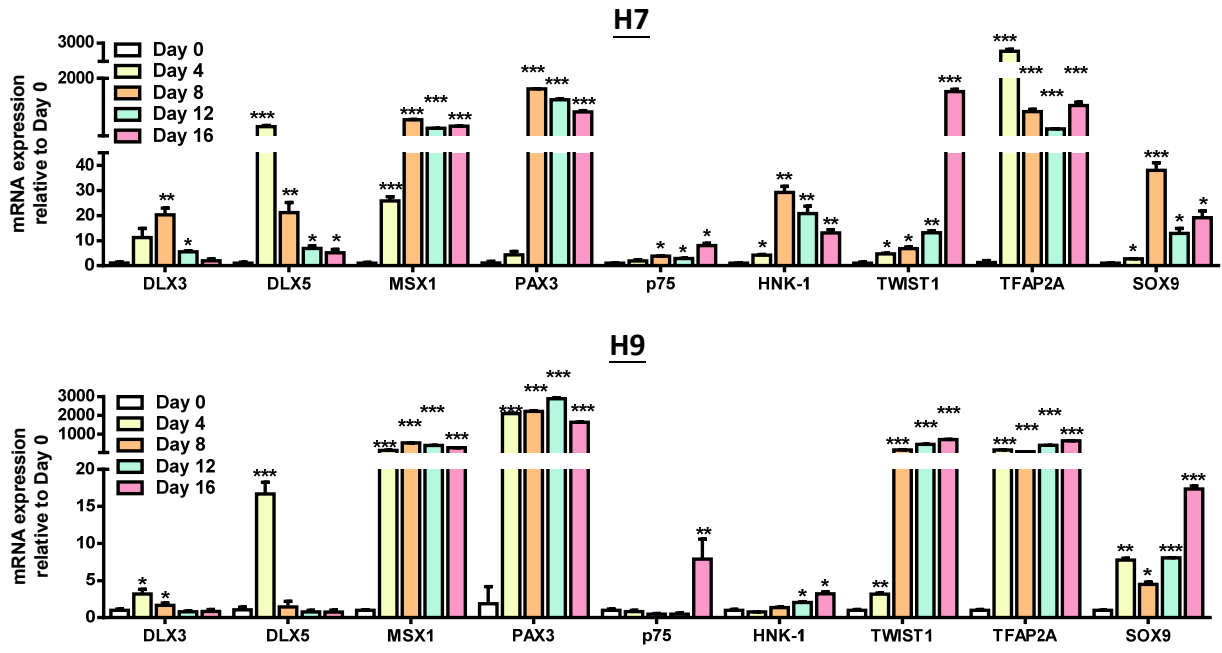

B

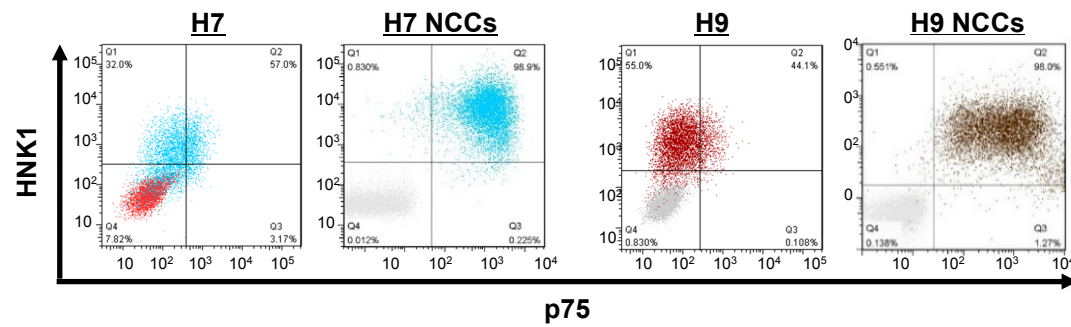

C

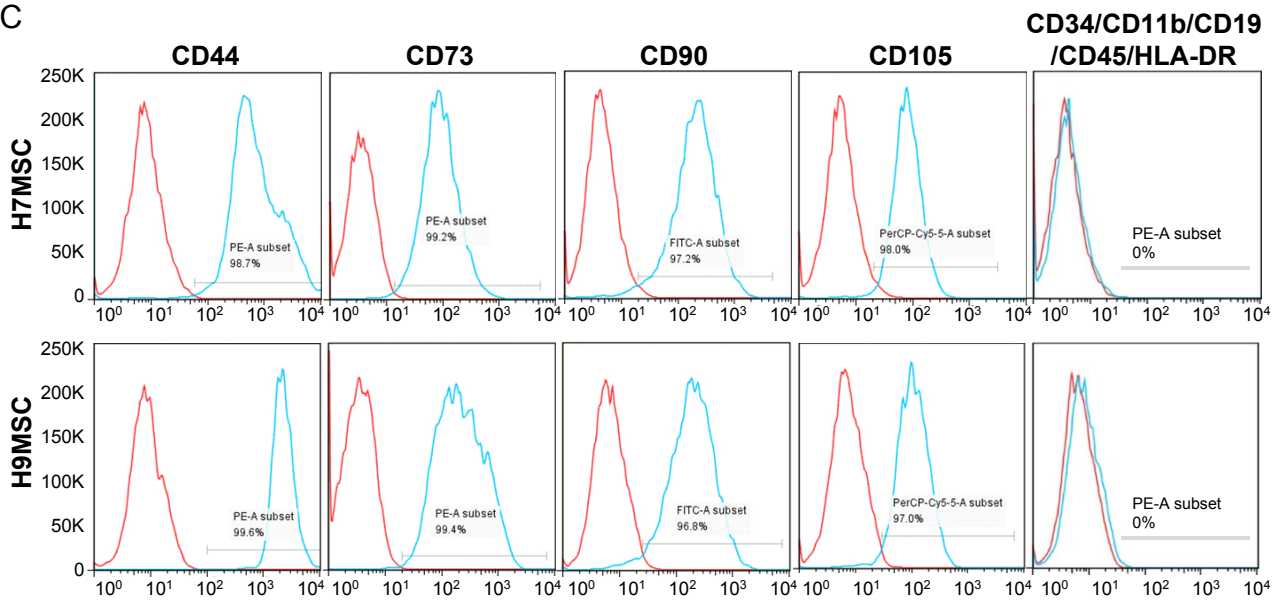

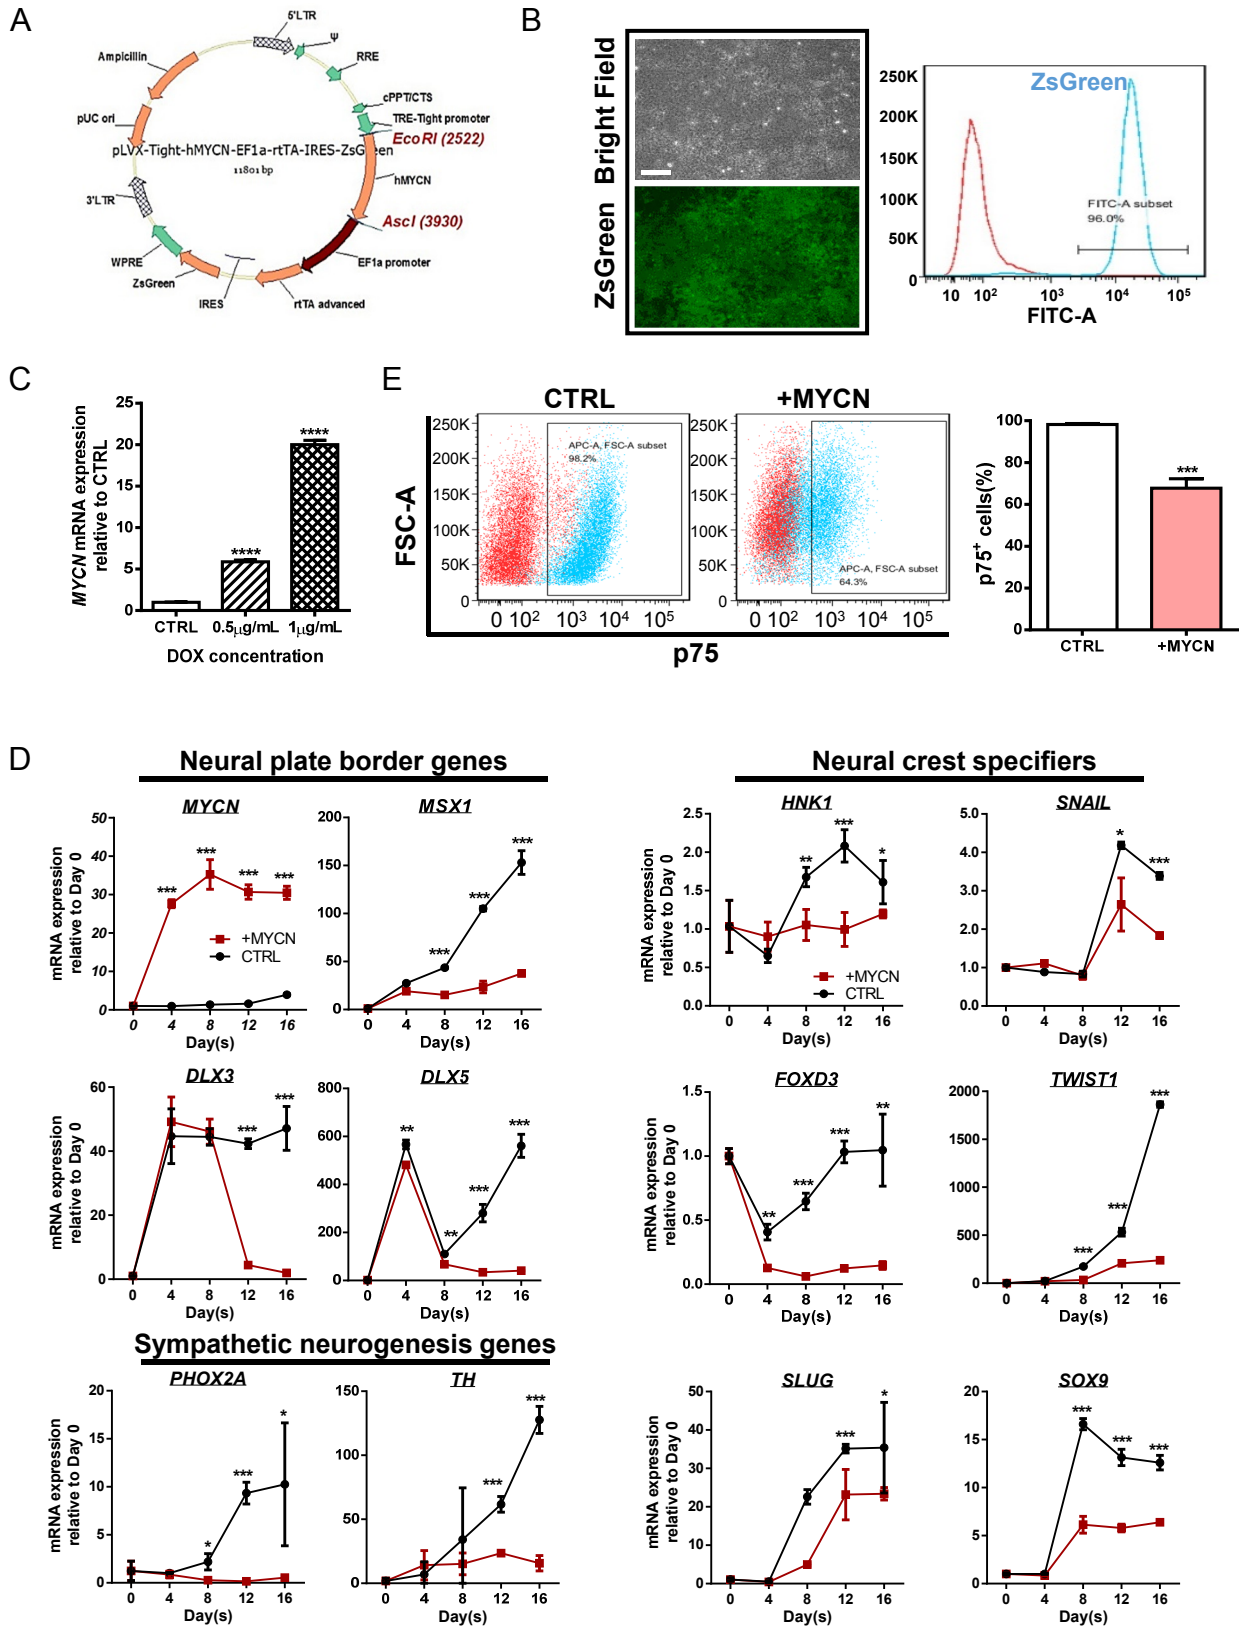

A

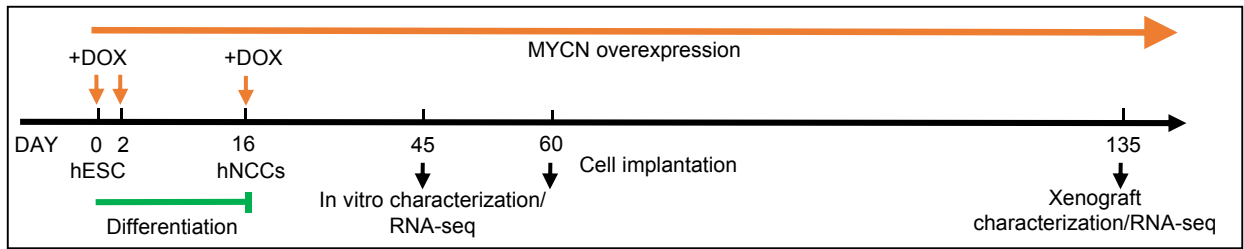

B

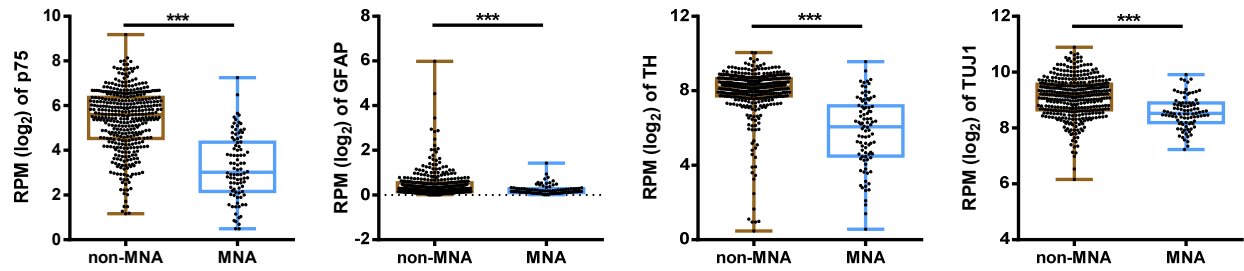

C

**Development**

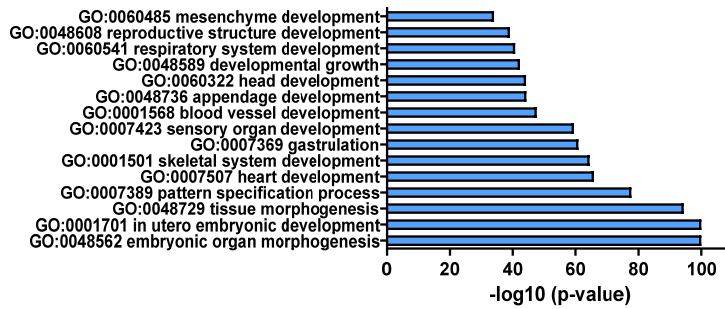

D

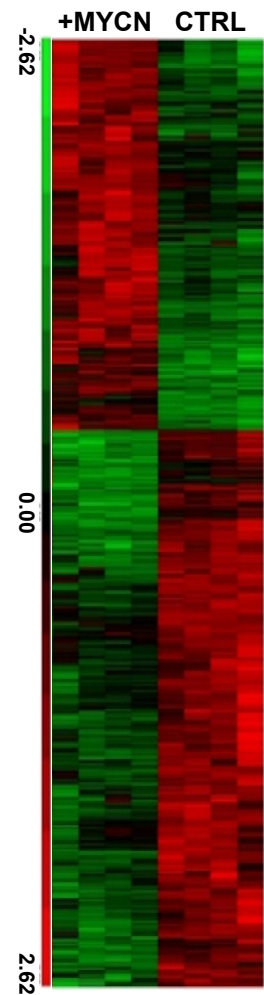

E

**1585 DEGs**

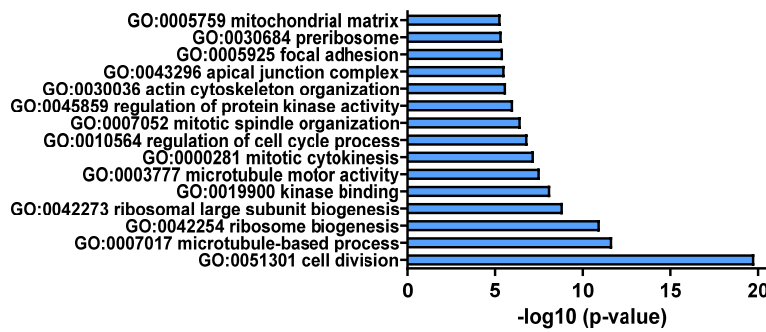

F

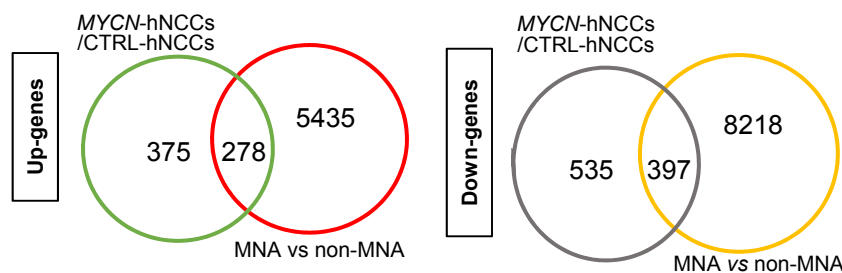

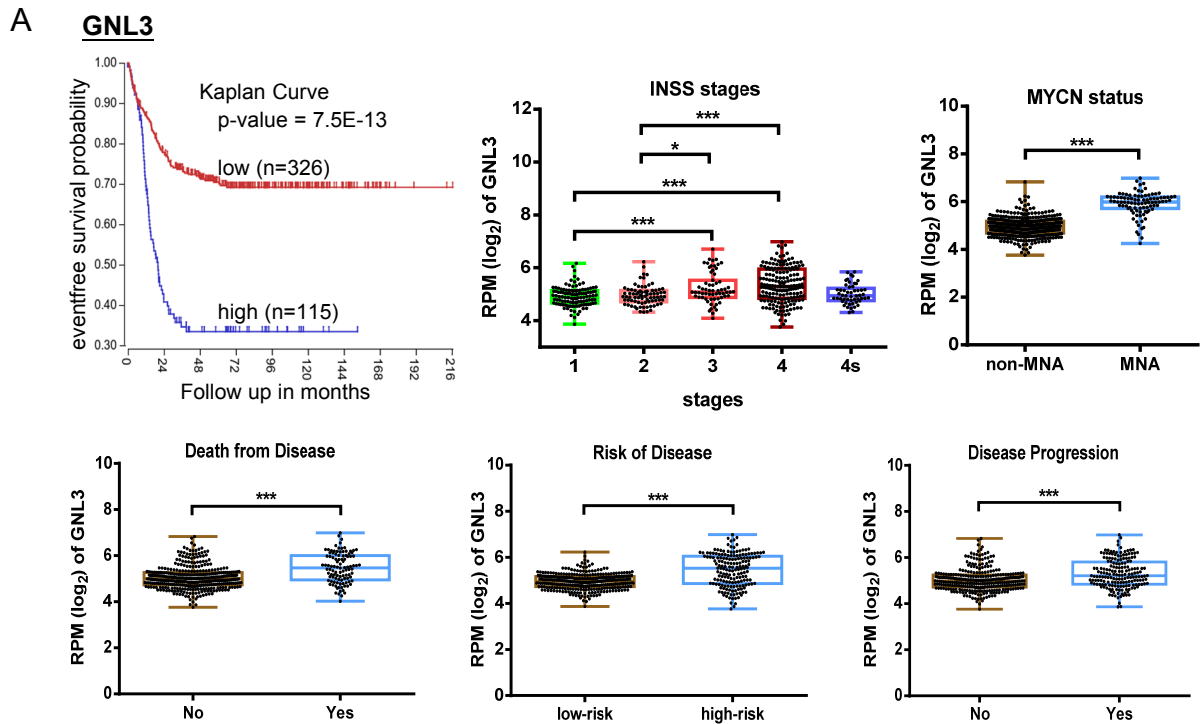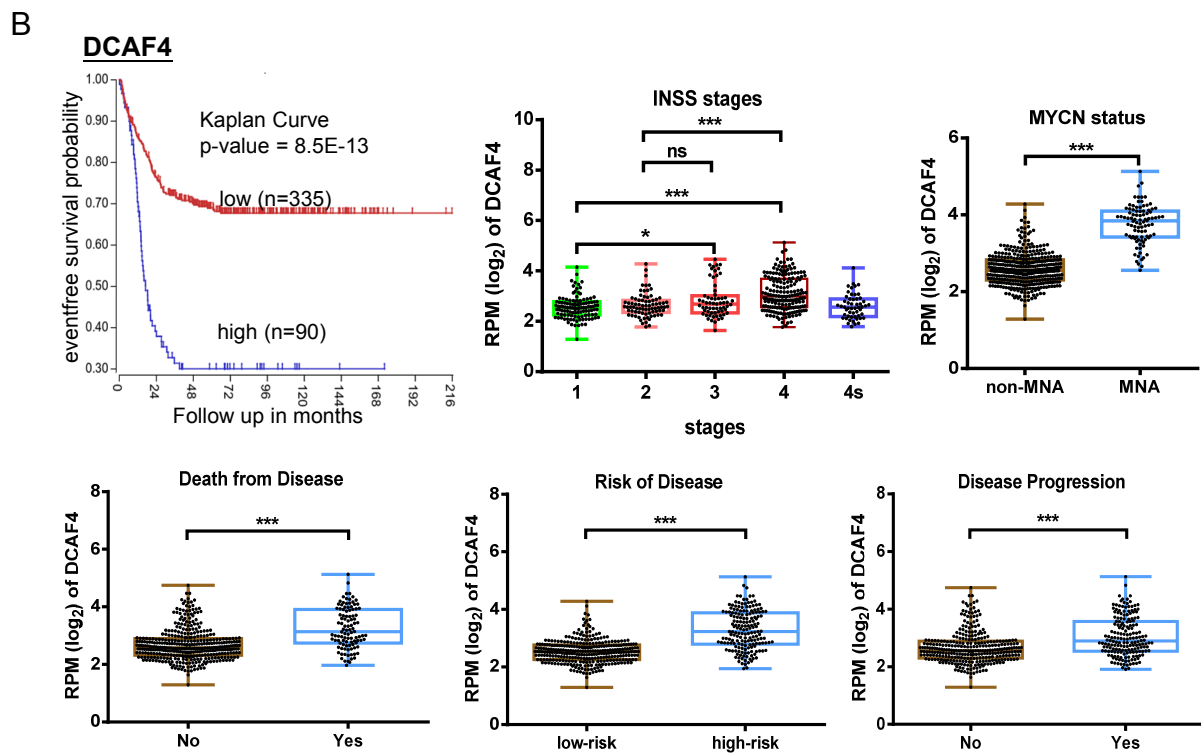

**C**

|                                                                          |                                                                           |
|--------------------------------------------------------------------------|---------------------------------------------------------------------------|
| Surface protein-encoding genes positively correlated with MYCN in MNA-NB | CD55, SLC6A6, QSOX2, LPAR3, SLC19A2, ABCC4, SCARB1, JAG2, SLC7A5, SLC43A1 |
| Surface protein-encoding genes negatively correlated with MYCN in MNA-NB | ERBB2, ACP2, TMEM8A, SLC9A1                                               |

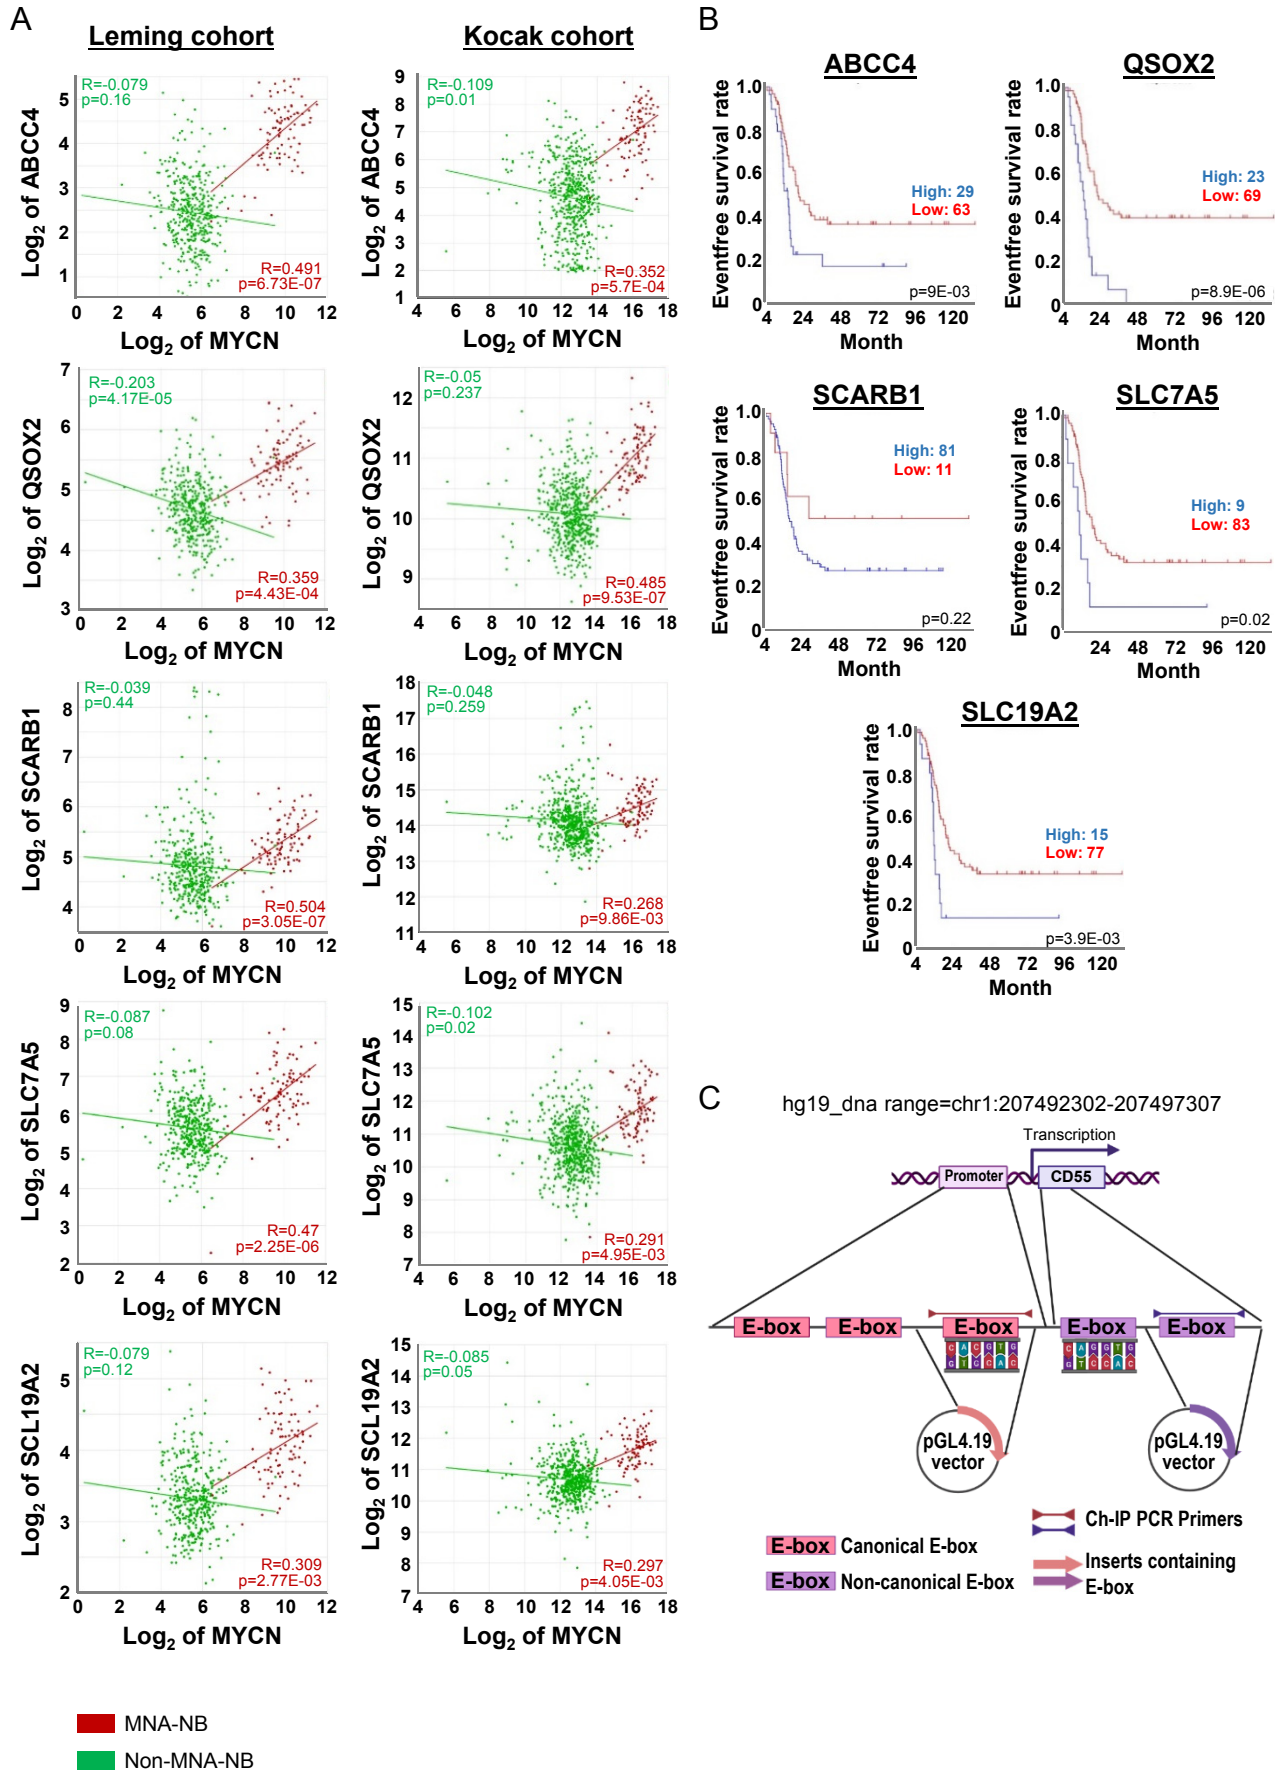

A

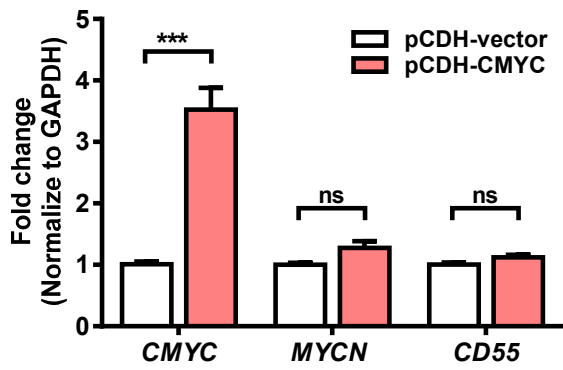

B

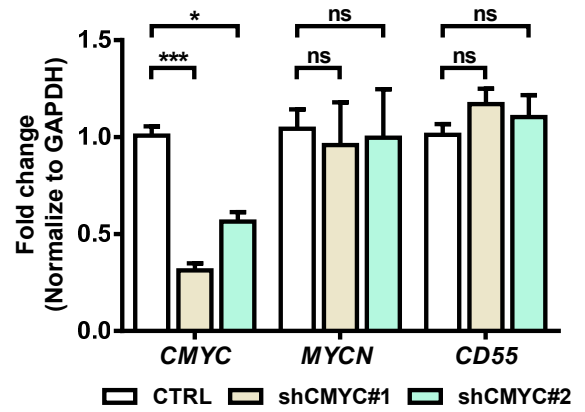

C

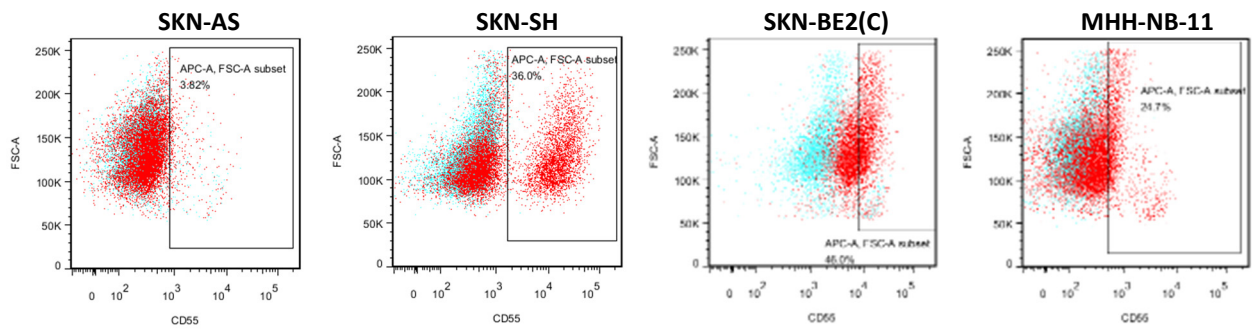

D

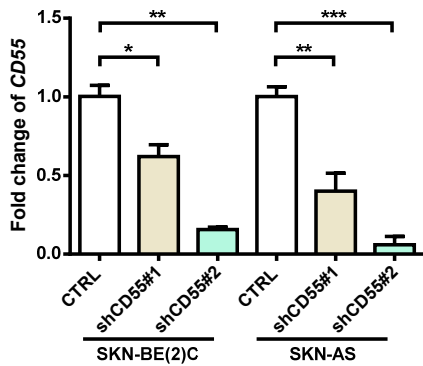

E

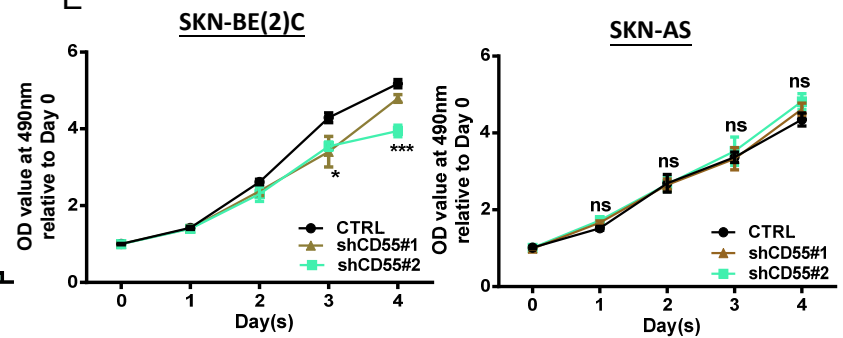

F

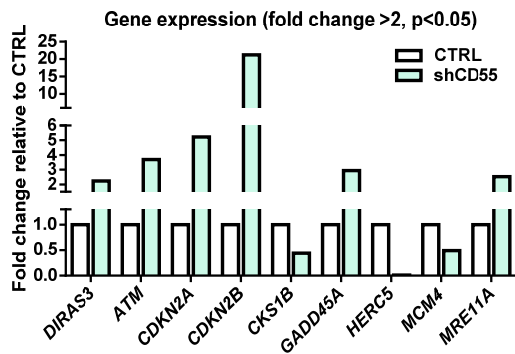

G

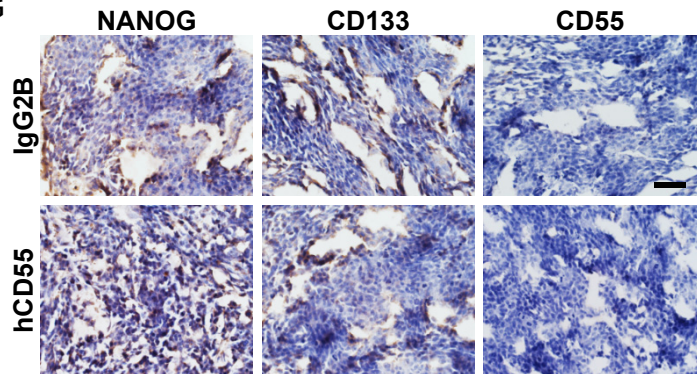

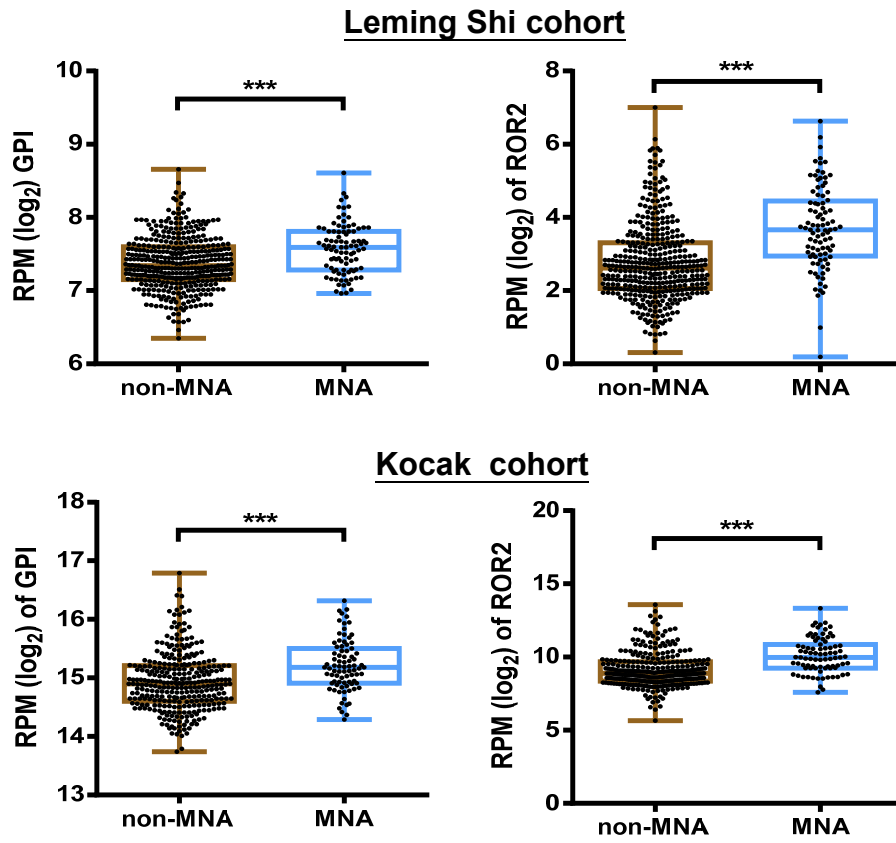

Supplement: noab241_suppl_supplementary_figures.pdf [file noab241_suppl_supplementary_figures.pdf]
