# Supplementary material for: Human embryonic stem cell-derived neural crest model unveils CD55 as a cancer stem cell regulator for therapeutic targeting in MYCN-amplified neuroblastoma
Source: PubMed Central journal article supplement — Neuro Oncol. 2021 Oct 16;24(6):872–85. doi: 10.1093/neuonc/noab241 (PMC9159429; doi:10.1093/neuonc/noab241), 2021-10-16
Supplement: noab241_suppl_supplementary_tables.pdf [file noab241_suppl_supplementary_tables.pdf]

**Supplementary Table 1: Primers used in this study****qPCR primers**

| <b>Name</b>                   | <b>Forward primer (5' to 3')</b> | <b>Reverse primer (5' to 3')</b> |
|-------------------------------|----------------------------------|----------------------------------|
| HNK-1                         | CTGGAGTCTGAGAAGGGGTC             | CGGAGACGCTCCGGACT                |
| NTRK1                         | TCAACAAAATGTGGACGGAGA            | GTGGTGAACACAGGCATCAC             |
| TH                            | CACGAAGTACTCCAGGTGGG             | CGAGCTGTGAAGGTGTTTGA             |
| MYCN<br>3 transcript variants | CTTCGGTCCAGCTTTCTCAC             | GTCCGAGCGTGTTC AATTTT            |
| MYCN<br>2 transcript variants | CACAGTGACCACGTCGATT              | CACAAGGCCCTCAGTACCTC             |
| SOX10                         | CTTTCTTGTGCTGCATACGG             | AGCTCAGCAAGACGCTGG               |
| SNAIL                         | TTTACCTTCCAGCAGCCCTA             | CCCCTGTCTCATCTGACA               |
| C-MYC                         | GCGTCCTGGGAAGGGAGATCCGGAGC       | TTGAGGGGCATCGTCGCGGGAGGCTG       |
| PHOX2 $\alpha$                | CTTCCAATACAGCCCCCTG              | ATGGCTCTGGGAAGA AACTTG           |
| PHOX2 $\beta$                 | CTTCGCGGAGACTCACTACC             | GTCGTCCCTGGAAGAGTCAG             |
| CCND1                         | TCCTCTCCAAAATGCCAGAG             | GGCGGATTGGAAATGAACTT             |
| BMI1                          | TTCATTGATGCCACAACCAT             | CATTTTTGAAAAGCCCTGGA             |
| HAND2                         | CAGCAACGACAAGAAAACCA             | GGATGATTCCAAATGCAAGG             |
| GATA3                         | CTCATTAAGCCCAAGCGAAG             | TTTTTCGGTTTCTGGTCTGG             |
| EZH2                          | TTGTCAATGTAGTTCAGAG              | GTAGCACGGGCACTGCTTG              |
| MASH1                         | CGGCCAACAAGAAGATGAGT             | CCGACGAGTAGGATGAGACC             |
| Peripherin (PRPH)             | AAGACGACTGTGCCTGAGGT             | ATGCAGAGGGAGAGGAGACA             |
| NGFR (P75)                    | ACCTCATCCCTGTCTATTGCTCC          | GCTGTTGGCTCCTTGCTTGTT            |
| CDKN2 $\alpha$                | CTTCCTGGACACGCTGGT               | CATGGTTACTGCCTCTGGTG             |
| CDKN2 $\beta$                 | GGGGACTAGTGGAGAAGGTG             | GGTGAGAGTGGCAGGGTC               |
| P21                           | CGACTGTGATGCGCTAATGG             | CTGCCTCCTCCCAACTCATC             |
| Tuj1 (TUBB3)                  | CCAGCTGCAAGTCCGAGT               | CGCCCAGTATGAGGGAGAT              |
| MAP2                          | GCCTTGTTATTTCTCCTGCAA            | GAGGAAGCATTGATTGGGAG             |
| $\alpha$ -SMA                 | AGGAAGGACCTCTATGCTAACAAT         | AACACATAGGTAACGAGTCAGAGC         |
| GAPDH                         | AGGGTCATCATCTCTGCC               | CCATCACGCCACAGTTTC               |
| CD55                          | GCAAGCCCATGGTTACTAGC             | CCCCAAATAAAGGAAGTGGA             |
| OCT4                          | CTCACCTGGGGTTCTATT               | CTCCAGGTTGCCTCTCACTC             |
| NANOG                         | GATTTGTGGGCCTGAAGAAA             | AAGTGGGTTGTTTGCCTTTG             |
| DLX3                          | CGGTTCTGGAACCAGATTTT             | CTTCCAGAAGGCCCAGTACC             |

|        |                        |                      |
|--------|------------------------|----------------------|
| DLX5   | TTTGCCATTCACCATTCTCA   | CGCTAGCTCCTACCACCAGT |
| PAX3   | CTTCATCTGATTGGGGTGCT   | GACTTGGAGAGGAAGGAGGC |
| TWIST1 | TCCATTTTCTCCTTCTCTGGAA | GTCCGCGTCCCCTAGC     |
| TFAPA  | ATTGACCTACAGTGCCCAGC   | ATGCTTTGGAAATTGACGGA |
| SOX9   | TCCACGAAGGGTCTCTTCTC   | AGGAAGCTGGCAGACCAGTA |
| ZIC1   | CACGTGCATGTGCTTCTTG    | AAGATCCACAAAAGGACGCA |
| GBX2   | TTGACTCGTCTTTCCTTGC    | AAAGGCTTCCTGGCCAAAG  |
| FOXD3  | GACGACGGGCTGGAAGAGAA   | GCCTCCTTGGGCAATGTCA  |
| SLUG   | TGTTGCAGTGAGGGCAAGAA   | GACCCTGGTTGCTTCAAGGA |
| SNAIL  | ACCACTATGCCGCGCTCTT    | GGTCGTAGGGCTGCTGGAA  |

CHIP-qPCR primers

| <b>Name</b>         | <b>Forward primer (5' to 3')</b> | <b>Reverse primer (5' to 3')</b> |
|---------------------|----------------------------------|----------------------------------|
| Canonical E-box     | GGATGCTCCGCTTAGACGAA             | AAACGGGGTGTAACGGGAG              |
| Non-canonical E-box | TCACACGATGCTGCAAACCT             | TTTTCAAGACACAAGCCCCCT            |

**Supplementary Table 2: Antibodies used in this study*****Primary Antibodies***

| <b>Name</b>                                       | <b>Manufacture</b> | <b>Catalog number</b> |
|---------------------------------------------------|--------------------|-----------------------|
| Anti-human-MYCN                                   | Abcam              | ab16898               |
| Anti-human-CD55                                   | Santa Cruz         | sc-51733              |
| Anti-human-CD55 neutralizing                      | R&D Systems        | MAB2009               |
| Anti-human-CD57-FIT-C (HNK-1)                     | Biologend          | 359604                |
| Anti-human-CD57-PB (HNK-1)                        | Biologend          | 359608                |
| Anti-human-CD271-APC (p75)                        | Biologend          | 345108                |
| Anti-human-GFAP                                   | R&D Systems        | MAB2594               |
| Anti-human-JNK                                    | Santa Cruz         | sc-7345               |
| Anti-human-MAP2                                   | Millipore          | AB5622                |
| Anti-human-NANOG                                  | Millipore          | AB9220                |
| Anti-human-OCT4                                   | Santa Cruz         | sc-8628               |
| Anti-human-p15                                    | Santa Cruz         | sc-612                |
| Anti-human-PCNA                                   | Santa Cruz         | sc-56                 |
| Anti-human-p-JNK                                  | Santa Cruz         | sc-6254               |
| Anti-p75                                          | Abcam              | ab-52987              |
| Anti-PHOX-2B                                      | Abcam              | ab-183741             |
| Anti-TUJ1                                         | Abcam              | ab-18207              |
| Anti-c-MYC                                        | Santa Cruz         | sc-40                 |
| Anti-human-SYP                                    | Sigma              | S5768                 |
| Anti-human-TH                                     | Sigma              | T2928                 |
| Anti-human-TRK                                    | Santa Cruz         | sc-7268               |
| Anti-human- $\beta$ -actin                        | ImmunoWay          | YM3028                |
| IgG2B Isotype Control                             | R&D Systems        | MAB004                |
| FITC Mouse IgM, $\kappa$ Isotype                  | Biologend          | #401606               |
| Pacific Blue™ Mouse IgM, $\kappa$ Isotype Ctrl Ab | Biologend          | #401619               |
| APC Mouse IgG1, $\kappa$ Isotype Ctrl             | Biologend          | #400122               |

***Secondary Antibodies***

| <b>Name</b>                             | <b>Manufacture</b> | <b>Catalog number</b> |
|-----------------------------------------|--------------------|-----------------------|
| Goat anti-Mouse IgG1                    | Invitrogen         | A-21121               |
| Goat Anti-Rabbit IgG(H+L) HRP Conjugate | Bio-rad            | #1706515              |
| Goat anti-Mouse IgG (H+L) HRP Conjugate | Invitrogen         | #31430                |
| IgG2B Isotype Control                   | R&D Systems        | MAB004                |
| FITC Mouse IgM, $\kappa$ Isotype        | Biologend          | #401606               |

Supplementary Table 3: Gene list of differentially expressed genes between control- and MYCN-hNCCs.

|    | Probeset ID   | Gene Symbol   | p-value(Attribute) | p-value(NC+MYCN vs. NC-CTRL) | MeanRatio(NC+MYCN N vs. NC-CTRL) | FoldChange(NC+MYCN N vs. NC-CTRL) | FoldChange(NC+MYCN vs. NC-CTRL) (Description) | F(Attribute) | SS(Attribute) | SS(Error)   | F(Error) |
|----|---------------|---------------|--------------------|------------------------------|----------------------------------|-----------------------------------|-----------------------------------------------|--------------|---------------|-------------|----------|
| 1  | RP4-680D5.8   | RP4-680D5.8   | 0.00668711         | 0.0086641                    | 0.00225055                       | -444.337                          | NC+MYCN down vs NC-CTRL                       | 8.71314      | 0.0387319     | 0.011854    | 1        |
| 2  | MYC           | MYC           | 4.98E-08           | 0.00546451                   | 0.024469                         | -40.868                           | NC+MYCN down vs NC-CTRL                       | 220.672      | 517.666       | 6.25565     | 1        |
| 3  | TMEFF2        | TMEFF2        | 0.0159125          | 0.00307372                   | 0.0262134                        | -38.1485                          | NC+MYCN down vs NC-CTRL                       | 6.42711      | 0.137194      | 0.0569229   | 1        |
| 4  | VIT           | VIT           | 0.0002413          | 8.39E-05                     | 0.031099                         | -32.1554                          | NC+MYCN down vs NC-CTRL                       | 23.8517      | 0.375487      | 0.0419801   | 1        |
| 5  | POSTN         | POSTN         | 0.0028426          | 0.000917224                  | 0.0593573                        | -16.8471                          | NC+MYCN down vs NC-CTRL                       | 11.5057      | 2633.46       | 610.357     | 1        |
| 6  | NQO1          | NQO1          | 0.00130886         | 0.000437423                  | 0.0684471                        | -14.6098                          | NC+MYCN down vs NC-CTRL                       | 14.6057      | 25890.7       | 4727.03     | 1        |
| 7  | RP11-115D19.1 | RP11-115D19.1 | 0.000225425        | 6.88E-05                     | 0.0721234                        | -13.8651                          | NC+MYCN down vs NC-CTRL                       | 24.3118      | 0.0441399     | 0.00484154  | 1        |
| 8  | AL592494.5    | AL592494.5    | 0.00280926         | 0.000944181                  | 0.0726976                        | -13.7556                          | NC+MYCN down vs NC-CTRL                       | 11.5485      | 0.0625646     | 0.0144468   | 1        |
| 9  | IL1RAPL2      | IL1RAPL2      | 4.75E-05           | 2.20E-05                     | 0.0735406                        | -13.5979                          | NC+MYCN down vs NC-CTRL                       | 37.2803      | 2.28756       | 0.16363     | 1        |
| 10 | CEACAM21      | CEACAM21      | 0.00940819         | 0.00393905                   | 0.0762414                        | -13.1162                          | NC+MYCN down vs NC-CTRL                       | 7.75401      | 0.361862      | 0.124447    | 1        |
| 11 | COL28A1       | COL28A1       | 0.00453671         | 0.00171713                   | 0.0775853                        | -12.889                           | NC+MYCN down vs NC-CTRL                       | 9.90641      | 1.50374       | 0.404786    | 1        |
| 12 | ADCY2         | ADCY2         | 0.000360218        | 0.000143849                  | 0.0812453                        | -12.3084                          | NC+MYCN down vs NC-CTRL                       | 21.296       | 0.289971      | 0.03631     | 1        |
| 13 | DLX2          | DLX2          | 0.00718929         | 0.00311768                   | 0.0839473                        | -11.9122                          | NC+MYCN down vs NC-CTRL                       | 8.50288      | 522.763       | 163.949     | 1        |
| 14 | ST13P10       | ST13P10       | 3.16E-05           | 0.0010886                    | 0.0856052                        | -11.6815                          | NC+MYCN down vs NC-CTRL                       | 41.5948      | 0.25347       | 0.0162501   | 1        |
| 15 | RP11-243A14.1 | RP11-243A14.1 | 0.000945955        | 0.000328124                  | 0.0859911                        | -11.6291                          | NC+MYCN down vs NC-CTRL                       | 16.0925      | 0.00138181    | 0.000228978 | 1        |
| 16 | RP11-17A1.3   | RP11-17A1.3   | 0.00897541         | 0.0040691                    | 0.0978589                        | -10.2188                          | NC+MYCN down vs NC-CTRL                       | 7.88154      | 0.00519116    | 0.00175639  | 1        |
| 17 | DLX1          | DLX1          | 0.00268007         | 0.00127241                   | 0.0990682                        | -10.0941                          | NC+MYCN down vs NC-CTRL                       | 11.7206      | 1364.54       | 310.461     | 1        |
| 18 | NMBR          | NMBR          | 0.0117806          | 0.00533536                   | 0.10048                          | -9.9522                           | NC+MYCN down vs NC-CTRL                       | 7.16509      | 0.0116536     | 0.00433719  | 1        |
| 19 | LPAL2         | LPAL2         | 0.0017403          | 0.000620656                  | 0.100565                         | -9.94385                          | NC+MYCN down vs NC-CTRL                       | 13.3968      | 0.0398916     | 0.00794053  | 1        |
| 20 | HAPLN1        | HAPLN1        | 0.00119214         | 0.00058504                   | 0.101067                         | -9.89438                          | NC+MYCN down vs NC-CTRL                       | 15.0211      | 107.848       | 19.146      | 1        |
| 21 | AC104801.1    | AC104801.1    | 0.00057009         | 0.000291014                  | 0.104579                         | -9.56216                          | NC+MYCN down vs NC-CTRL                       | 18.6653      | 0.270496      | 0.0386451   | 1        |
| 22 | ENPP7P1       | ENPP7P1       | 0.0130026          | 0.011047                     | 0.10781                          | -9.27559                          | NC+MYCN down vs NC-CTRL                       | 6.91677      | 0.0335025     | 0.0129164   | 1        |
| 23 | RP5-973M2.2   | RP5-973M2.2   | 0.00346389         | 0.00132436                   | 0.115419                         | -8.66408                          | NC+MYCN down vs NC-CTRL                       | 10.8067      | 0.260732      | 0.0643384   | 1        |
| 24 | ABCG2         | ABCG2         | 0.000637573        | 0.000341821                  | 0.116517                         | -8.58247                          | NC+MYCN down vs NC-CTRL                       | 18.0686      | 248.089       | 36.6143     | 1        |
| 25 | FREM1         | FREM1         | 0.000238739        | 6.26E-05                     | 0.128807                         | -7.76358                          | NC+MYCN down vs NC-CTRL                       | 23.9234      | 193.171       | 21.5322     | 1        |
| 26 | RP4-625H18.2  | RP4-625H18.2  | 0.0222719          | 0.00482234                   | 0.131669                         | -7.59481                          | NC+MYCN down vs NC-CTRL                       | 5.66401      | 0.0206525     | 0.00972338  | 1        |
| 27 | MUC19         | MUC19         | 0.016128           | 0.0117997                    | 0.133323                         | -7.50056                          | NC+MYCN down vs NC-CTRL                       | 6.39535      | 0.00175685    | 0.000732552 | 1        |
| 28 | AC123886.2    | AC123886.2    | 0.018857           | 0.00671687                   | 0.135854                         | -7.36086                          | NC+MYCN down vs NC-CTRL                       | 6.03389      | 0.395573      | 0.174823    | 1        |
| 29 | HIST1H4E      | HIST1H4E      | 0.0100497          | 0.00296455                   | 0.139436                         | -7.17174                          | NC+MYCN down vs NC-CTRL                       | 7.57786      | 0.149778      | 0.0527073   | 1        |
| 30 | RN7SL526P     | RN7SL526P     | 0.00188266         | 0.00110656                   | 0.143693                         | -6.9593                           | NC+MYCN down vs NC-CTRL                       | 13.078       | 0.187         | 0.0381303   | 1        |
| 31 | GCNT4         | GCNT4         | 0.0205575          | 0.0091883                    | 0.146626                         | -6.82007                          | NC+MYCN down vs NC-CTRL                       | 5.84013      | 0.420543      | 0.192025    | 1        |
| 32 | RP11-63L7.5   | RP11-63L7.5   | 0.00237447         | 0.00140431                   | 0.147266                         | -6.79043                          | NC+MYCN down vs NC-CTRL                       | 12.1726      | 0.053944      | 0.0118176   | 1        |
| 33 | RP11-160E2.16 | RP11-160E2.16 | 0.0155878          | 0.00578217                   | 0.149316                         | -6.69721                          | NC+MYCN down vs NC-CTRL                       | 6.47598      | 0.0519345     | 0.0213855   | 1        |
| 34 | MECOM         | MECOM         | 4.33E-06           | 3.01E-06                     | 0.149412                         | -6.69289                          | NC+MYCN down vs NC-CTRL                       | 70.2761      | 134.907       | 5.11911     | 1        |
| 35 | ERP27         | ERP27         | 0.0208354          | 0.00728556                   | 0.150023                         | -6.66565                          | NC+MYCN down vs NC-CTRL                       | 5.81037      | 0.0161645     | 0.0074187   | 1        |
| 36 | RP11-460E7.8  | RP11-460E7.8  | 0.000272649        | 0.000150427                  | 0.151783                         | -6.58836                          | NC+MYCN down vs NC-CTRL                       | 23.0454      | 17.7603       | 2.05512     | 1        |
| 37 | C12orf39      | C12orf39      | 0.013141           | 0.00680106                   | 0.152679                         | -6.54967                          | NC+MYCN down vs NC-CTRL                       | 6.8905       | 0.0127132     | 0.00492009  | 1        |
| 38 | ZBBX          | ZBBX          | 0.00051195         | 0.000221181                  | 0.154107                         | -6.48898                          | NC+MYCN down vs NC-CTRL                       | 19.2549      | 0.0328408     | 0.00454821  | 1        |
| 39 | SLC22A3       | SLC22A3       | 0.00566399         | 0.00335591                   | 0.157706                         | -6.34093                          | NC+MYCN down vs NC-CTRL                       | 9.20983      | 0.0337841     | 0.00978205  | 1        |
| 40 | RP11-798K3.2  | RP11-798K3.2  | 0.00041898         | 0.000277084                  | 0.157839                         | -6.33555                          | NC+MYCN down vs NC-CTRL                       | 20.3966      | 0.0526298     | 0.00688087  | 1        |
| 41 | RP11-147L13.7 | RP11-147L13.7 | 0.0111492          | 0.00282257                   | 0.15849                          | -6.30954                          | NC+MYCN down vs NC-CTRL                       | 7.30635      | 0.104343      | 0.0380832   | 1        |
| 42 | RP11-686D22.3 | RP11-686D22.3 | 2.93E-06           | 2.30E-06                     | 0.165645                         | -6.03702                          | NC+MYCN down vs NC-CTRL                       | 77.759       | 2.47502       | 0.0848785   | 1        |
| 43 | PCDP1         | PCDP1         | 0.0213677          | 0.00469258                   | 0.167219                         | -5.98017                          | NC+MYCN down vs NC-CTRL                       | 5.75471      | 0.012539      | 0.00581043  | 1        |

|    | Probeset ID   | Gene Symbol   | p-value(Attribute) | p-value(NC+MYCN vs. NC-CTRL) | MeanRatio(NC+MYCN N vs. NC-CTRL) | FoldChange(NC+MYCN N vs. NC-CTRL) | FoldChange(NC+MYCN vs. NC-CTRL) (Description) | F(Attribute) | SS(Attribute) | SS(Error)  | F(Error) |
|----|---------------|---------------|--------------------|------------------------------|----------------------------------|-----------------------------------|-----------------------------------------------|--------------|---------------|------------|----------|
| 44 | RP11-159F24.6 | RP11-159F24.6 | 0.00175545         | 0.000832642                  | 0.169576                         | -5.89707                          | NC+MYCN down vs NC-CTRL                       | 13.3613      | 0.10815       | 0.0215847  | 1        |
| 45 | ZNF703        | ZNF703        | 0.00979458         | 0.00367263                   | 0.173151                         | -5.77531                          | NC+MYCN down vs NC-CTRL                       | 7.64618      | 437.657       | 152.636    | 1        |
| 46 | RCAN2         | RCAN2         | 0.00435942         | 0.00286296                   | 0.176337                         | -5.67097                          | NC+MYCN down vs NC-CTRL                       | 10.0357      | 0.0231045     | 0.00613933 | 1        |
| 47 | ST6GALNAC5    | ST6GALNAC5    | 0.00427219         | 0.00840382                   | 0.179923                         | -5.55792                          | NC+MYCN down vs NC-CTRL                       | 10.1017      | 131.86        | 34.8088    | 1        |
| 48 | SLC25A36P1    | SLC25A36P1    | 0.0239908          | 0.00571684                   | 0.180452                         | -5.54164                          | NC+MYCN down vs NC-CTRL                       | 5.50361      | 0.253669      | 0.12291    | 1        |
| 49 | SLC25A34      | SLC25A34      | 0.00192104         | 0.000308343                  | 0.181416                         | -5.5122                           | NC+MYCN down vs NC-CTRL                       | 12.9972      | 1.09153       | 0.223952   | 1        |
| 50 | AC073342.12   | AC073342.12   | 0.0155682          | 0.00392542                   | 0.182049                         | -5.49304                          | NC+MYCN down vs NC-CTRL                       | 6.47898      | 0.0698395     | 0.0287451  | 1        |
| 51 | RP11-35J10.4  | RP11-35J10.4  | 0.0189886          | 0.0115162                    | 0.182748                         | -5.47201                          | NC+MYCN down vs NC-CTRL                       | 6.01813      | 0.112615      | 0.0499002  | 1        |
| 52 | AF196972.9    | AF196972.9    | 0.00548832         | 0.00266025                   | 0.184629                         | -5.41627                          | NC+MYCN down vs NC-CTRL                       | 9.3064       | 0.0686973     | 0.0196846  | 1        |
| 53 | ID4           | ID4           | 0.000908167        | 0.000624089                  | 0.187068                         | -5.34566                          | NC+MYCN down vs NC-CTRL                       | 16.2878      | 768.471       | 125.815    | 1        |
| 54 | CTD-2616J11.3 | CTD-2616J11.3 | 0.0131128          | 0.00569213                   | 0.187687                         | -5.32801                          | NC+MYCN down vs NC-CTRL                       | 6.89581      | 0.252633      | 0.0976953  | 1        |
| 55 | VMO1          | VMO1          | 0.00201962         | 0.000825393                  | 0.189394                         | -5.28001                          | NC+MYCN down vs NC-CTRL                       | 12.7985      | 0.0890982     | 0.0185643  | 1        |
| 56 | RP1-151B14.6  | RP1-151B14.6  | 0.0132377          | 0.00866928                   | 0.193555                         | -5.16649                          | NC+MYCN down vs NC-CTRL                       | 6.87233      | 0.0343028     | 0.0133105  | 1        |
| 57 | RP11-696D21.2 | RP11-696D21.2 | 0.00265294         | 0.00174407                   | 0.194222                         | -5.14875                          | NC+MYCN down vs NC-CTRL                       | 11.758       | 0.435421      | 0.0987513  | 1        |
| 58 | WHAMMP2       | WHAMMP2       | 0.0168217          | 0.00496208                   | 0.195907                         | -5.10447                          | NC+MYCN down vs NC-CTRL                       | 6.29661      | 2.56739       | 1.08731    | 1        |
| 59 | RBMXP4        | RBMXP4        | 0.0113473          | 0.00262146                   | 0.196922                         | -5.07814                          | NC+MYCN down vs NC-CTRL                       | 7.26097      | 0.158412      | 0.0581783  | 1        |
| 60 | FLI1          | FLI1          | 0.00722734         | 0.00493821                   | 0.19693                          | -5.07795                          | NC+MYCN down vs NC-CTRL                       | 8.4877       | 39.0495       | 12.2686    | 1        |
| 61 | RN7SL324P     | RN7SL324P     | 0.0159681          | 0.0105658                    | 0.199605                         | -5.0099                           | NC+MYCN down vs NC-CTRL                       | 6.41887      | 0.0969723     | 0.0402863  | 1        |
| 62 | NAP1L3        | NAP1L3        | 0.00207316         | 0.000696293                  | 0.199718                         | -5.00707                          | NC+MYCN down vs NC-CTRL                       | 12.6956      | 298.463       | 62.6912    | 1        |
| 63 | RP11-434D11.4 | RP11-434D11.4 | 0.00338349         | 0.000946386                  | 0.200474                         | -4.98819                          | NC+MYCN down vs NC-CTRL                       | 10.8879      | 0.05211       | 0.0127628  | 1        |
| 64 | ARSD-AS1      | ARSD-AS1      | 0.0022397          | 0.00207179                   | 0.200607                         | -4.98488                          | NC+MYCN down vs NC-CTRL                       | 12.3956      | 1.15954       | 0.249452   | 1        |
| 65 | RP11-172F10.1 | RP11-172F10.1 | 0.0168919          | 0.0111858                    | 0.200954                         | -4.97627                          | NC+MYCN down vs NC-CTRL                       | 6.2869       | 0.016773      | 0.00711449 | 1        |
| 66 | RP11-285G1.14 | RP11-285G1.14 | 0.010205           | 0.00323472                   | 0.201876                         | -4.95353                          | NC+MYCN down vs NC-CTRL                       | 7.53731      | 0.154551      | 0.0546796  | 1        |
| 67 | SIGLEC10      | SIGLEC10      | 0.00798132         | 0.00254739                   | 0.204171                         | -4.89786                          | NC+MYCN down vs NC-CTRL                       | 8.20597      | 0.0234686     | 0.00762651 | 1        |
| 68 | ZNF135        | ZNF135        | 0.00397336         | 0.00168276                   | 0.20615                          | -4.85083                          | NC+MYCN down vs NC-CTRL                       | 10.3413      | 2.26834       | 0.584928   | 1        |
| 69 | RP11-297A16.2 | RP11-297A16.2 | 0.0146223          | 0.00699655                   | 0.2063                           | -4.84732                          | NC+MYCN down vs NC-CTRL                       | 6.62916      | 0.0114615     | 0.00461053 | 1        |
| 70 | RP11-552F3.4  | RP11-552F3.4  | 0.000234521        | 0.00226526                   | 0.207588                         | -4.81724                          | NC+MYCN down vs NC-CTRL                       | 24.0434      | 1.68109       | 0.186451   | 1        |
| 71 | MOXD1         | MOXD1         | 0.0173032          | 0.00783347                   | 0.211165                         | -4.73564                          | NC+MYCN down vs NC-CTRL                       | 6.231        | 1024.88       | 438.616    | 1        |
| 72 | RP11-293M10.6 | RP11-293M10.6 | 0.00188696         | 0.00336006                   | 0.211973                         | -4.71757                          | NC+MYCN down vs NC-CTRL                       | 13.0688      | 0.0388238     | 0.0079219  | 1        |
| 73 | ARHGAP5-AS1   | ARHGAP5-AS1   | 5.70E-06           | 3.78E-06                     | 0.212637                         | -4.70284                          | NC+MYCN down vs NC-CTRL                       | 65.4228      | 534.218       | 21.775     | 1        |
| 74 | RP11-806L2.5  | RP11-806L2.5  | 0.00271683         | 0.00134383                   | 0.213216                         | -4.69008                          | NC+MYCN down vs NC-CTRL                       | 11.6706      | 1.12286       | 0.256567   | 1        |
| 75 | MIA           | MIA           | 4.30E-05           | 3.38E-05                     | 0.213621                         | -4.68118                          | NC+MYCN down vs NC-CTRL                       | 38.3023      | 13.3409       | 0.928813   | 1        |
| 76 | NKX3-2        | NKX3-2        | 8.76E-06           | 9.25E-06                     | 0.213796                         | -4.67736                          | NC+MYCN down vs NC-CTRL                       | 58.4591      | 9.31416       | 0.424874   | 1        |
| 77 | FN1           | FN1           | 0.000484127        | 0.000184497                  | 0.217297                         | -4.60199                          | NC+MYCN down vs NC-CTRL                       | 19.5676      | 759.331       | 103.482    | 1        |
| 78 | JDP2          | JDP2          | 0.00607096         | 0.00173013                   | 0.220777                         | -4.52946                          | NC+MYCN down vs NC-CTRL                       | 8.99979      | 1.48199       | 0.439119   | 1        |
| 79 | IGSF5         | IGSF5         | 0.013196           | 0.00903396                   | 0.226875                         | -4.40772                          | NC+MYCN down vs NC-CTRL                       | 6.88015      | 0.203833      | 0.0790035  | 1        |
| 80 | USP27X-AS1    | USP27X-AS1    | 0.000828589        | 0.00025386                   | 0.229404                         | -4.35912                          | NC+MYCN down vs NC-CTRL                       | 16.7345      | 0.330891      | 0.0527281  | 1        |
| 81 | RP11-686D22.4 | RP11-686D22.4 | 0.020278           | 0.0115972                    | 0.230189                         | -4.34426                          | NC+MYCN down vs NC-CTRL                       | 5.87057      | 15.2465       | 6.92562    | 1        |
| 82 | RPL13P5       | RPL13P5       | 0.0215937          | 0.00926796                   | 0.230705                         | -4.33454                          | NC+MYCN down vs NC-CTRL                       | 5.7316       | 3.17971       | 1.47938    | 1        |
| 83 | RPL36P4       | RPL36P4       | 0.011855           | 0.00454723                   | 0.23392                          | -4.27497                          | NC+MYCN down vs NC-CTRL                       | 7.14906      | 1.18484       | 0.441957   | 1        |
| 84 | SHBG          | SHBG          | 0.00170913         | 0.00122498                   | 0.234233                         | -4.26926                          | NC+MYCN down vs NC-CTRL                       | 13.471       | 0.160939      | 0.031859   | 1        |
| 85 | GPC3          | GPC3          | 0.00451089         | 0.00342293                   | 0.238145                         | -4.19913                          | NC+MYCN down vs NC-CTRL                       | 9.92483      | 64098.1       | 17222.3    | 1        |
| 86 | PRR5L         | PRR5L         | 0.018202           | 0.0108275                    | 0.241472                         | -4.14126                          | NC+MYCN down vs NC-CTRL                       | 6.11442      | 0.69495       | 0.303087   | 1        |

|     | Probeset ID   | Gene Symbol   | p-value(Attribute) | p-value(NC+MYCN vs. NC-CTRL) | MeanRatio(NC+MYCN N vs. NC-CTRL) | FoldChange(NC+MYCN N vs. NC-CTRL) | FoldChange(NC+MYCN vs. NC-CTRL) (Description) | F(Attribute) | SS(Attribute) | SS(Error)   | F(Error) |
|-----|---------------|---------------|--------------------|------------------------------|----------------------------------|-----------------------------------|-----------------------------------------------|--------------|---------------|-------------|----------|
| 87  | AC009299.2    | AC009299.2    | 0.00919028         | 0.00552732                   | 0.245268                         | -4.07717                          | NC+MYCN down vs NC-CTRL                       | 7.81728      | 0.0134111     | 0.00457486  | 1        |
| 88  | FLRT2         | FLRT2         | 0.0180401          | 0.0110683                    | 0.245286                         | -4.07688                          | NC+MYCN down vs NC-CTRL                       | 6.13489      | 406.433       | 176.665     | 1        |
| 89  | CTC-756D1.3   | CTC-756D1.3   | 0.00977567         | 0.00399984                   | 0.245336                         | -4.07605                          | NC+MYCN down vs NC-CTRL                       | 7.65133      | 0.416944      | 0.145315    | 1        |
| 90  | RP1-37N7.3    | RP1-37N7.3    | 0.00544139         | 0.00232863                   | 0.246058                         | -4.06408                          | NC+MYCN down vs NC-CTRL                       | 9.33285      | 1.88524       | 0.538669    | 1        |
| 91  | RP11-419M24.4 | RP11-419M24.4 | 0.0128699          | 0.00369817                   | 0.247199                         | -4.04532                          | NC+MYCN down vs NC-CTRL                       | 6.9423       | 0.182561      | 0.0701252   | 1        |
| 92  | RP11-903H12.3 | RP11-903H12.3 | 0.000263985        | 0.000312578                  | 0.248089                         | -4.03081                          | NC+MYCN down vs NC-CTRL                       | 23.2562      | 0.0709919     | 0.00814028  | 1        |
| 93  | YPEL4         | YPEL4         | 0.0213976          | 0.00454379                   | 0.248939                         | -4.01705                          | NC+MYCN down vs NC-CTRL                       | 5.75163      | 4.12791       | 1.91385     | 1        |
| 94  | AC006129.2    | AC006129.2    | 0.00794795         | 0.00656817                   | 0.249813                         | -4.003                            | NC+MYCN down vs NC-CTRL                       | 8.21773      | 0.28842       | 0.0935928   | 1        |
| 95  | QRICH2        | QRICH2        | 0.00110642         | 0.000149248                  | 0.250105                         | -3.99831                          | NC+MYCN down vs NC-CTRL                       | 15.36        | 7.93767       | 1.37806     | 1        |
| 96  | CXCL5         | CXCL5         | 0.00980275         | 0.00872336                   | 0.25081                          | -3.98708                          | NC+MYCN down vs NC-CTRL                       | 7.64396      | 0.000643889   | 0.000224627 | 1        |
| 97  | AC007966.1    | AC007966.1    | 0.00855058         | 0.00554555                   | 0.251035                         | -3.9835                           | NC+MYCN down vs NC-CTRL                       | 8.01441      | 0.0611563     | 0.0203488   | 1        |
| 98  | RHOJ          | RHOJ          | 0.000175178        | 0.00021537                   | 0.252718                         | -3.95698                          | NC+MYCN down vs NC-CTRL                       | 26.0865      | 256.917       | 26.2631     | 1        |
| 99  | RP1-93H18.1   | RP1-93H18.1   | 0.00101568         | 0.000570362                  | 0.252721                         | -3.95694                          | NC+MYCN down vs NC-CTRL                       | 15.7565      | 1.09323       | 0.185022    | 1        |
| 100 | AC020915.2    | AC020915.2    | 0.0116422          | 0.0105352                    | 0.257959                         | -3.87658                          | NC+MYCN down vs NC-CTRL                       | 7.19523      | 0.00444384    | 0.00164696  | 1        |
| 101 | TUBA3FP       | TUBA3FP       | 0.00113504         | 0.000188535                  | 0.259886                         | -3.84784                          | NC+MYCN down vs NC-CTRL                       | 15.2433      | 9.191         | 1.60787     | 1        |
| 102 | CTD-2589H19.6 | CTD-2589H19.6 | 0.0137615          | 0.00255127                   | 0.26307                          | -3.80126                          | NC+MYCN down vs NC-CTRL                       | 6.77677      | 1.08627       | 0.42745     | 1        |
| 103 | RP11-480N24.4 | RP11-480N24.4 | 0.00732865         | 0.00261403                   | 0.263662                         | -3.79273                          | NC+MYCN down vs NC-CTRL                       | 8.44776      | 0.802371      | 0.253281    | 1        |
| 104 | CTC-359D24.3  | CTC-359D24.3  | 0.00173907         | 0.00236714                   | 0.264048                         | -3.7872                           | NC+MYCN down vs NC-CTRL                       | 13.3997      | 10.858        | 2.16085     | 1        |
| 105 | ACTA2         | ACTA2         | 0.00167539         | 0.0014974                    | 0.264483                         | -3.78096                          | NC+MYCN down vs NC-CTRL                       | 13.5532      | 40.5637       | 7.98114     | 1        |
| 106 | RP11-411B10.8 | RP11-411B10.8 | 0.00454487         | 0.00281942                   | 0.265223                         | -3.77042                          | NC+MYCN down vs NC-CTRL                       | 9.90061      | 0.117018      | 0.0315181   | 1        |
| 107 | PRELP         | PRELP         | 0.00219963         | 0.00250005                   | 0.267155                         | -3.74314                          | NC+MYCN down vs NC-CTRL                       | 12.4652      | 495.406       | 105.982     | 1        |
| 108 | DNAH9         | DNAH9         | 0.000849573        | 0.000618848                  | 0.267172                         | -3.7429                           | NC+MYCN down vs NC-CTRL                       | 16.6116      | 0.11801       | 0.0189441   | 1        |
| 109 | KIAA1683      | KIAA1683      | 2.16E-05           | 0.000380414                  | 0.267537                         | -3.7378                           | NC+MYCN down vs NC-CTRL                       | 46.0727      | 2.13585       | 0.123622    | 1        |
| 110 | JUN           | JUN           | 0.00157791         | 0.008917                     | 0.269445                         | -3.71133                          | NC+MYCN down vs NC-CTRL                       | 13.8028      | 457.604       | 88.4078     | 1        |
| 111 | RP11-454F8.2  | RP11-454F8.2  | 0.0158344          | 0.0037739                    | 0.270929                         | -3.69101                          | NC+MYCN down vs NC-CTRL                       | 6.43875      | 0.0854566     | 0.0353926   | 1        |
| 112 | DLGAP1-AS2    | DLGAP1-AS2    | 0.000251513        | 0.00025883                   | 0.273562                         | -3.65548                          | NC+MYCN down vs NC-CTRL                       | 23.5753      | 0.98994       | 0.111975    | 1        |
| 113 | AL079342.1    | AL079342.1    | 0.00728492         | 0.00214998                   | 0.274088                         | -3.64847                          | NC+MYCN down vs NC-CTRL                       | 8.46491      | 0.013226      | 0.00416652  | 1        |
| 114 | RP11-62F24.2  | RP11-62F24.2  | 0.00174912         | 0.00077508                   | 0.274447                         | -3.6437                           | NC+MYCN down vs NC-CTRL                       | 13.3761      | 0.48568       | 0.0968254   | 1        |
| 115 | HMGA2         | HMGA2         | 3.87E-07           | 6.65E-07                     | 0.275525                         | -3.62943                          | NC+MYCN down vs NC-CTRL                       | 130.959      | 12121.1       | 246.818     | 1        |
| 116 | RP11-635N19.1 | RP11-635N19.1 | 0.0108418          | 0.00452021                   | 0.276267                         | -3.61968                          | NC+MYCN down vs NC-CTRL                       | 7.37876      | 4.01439       | 1.45079     | 1        |
| 117 | MAGEL2        | MAGEL2        | 0.00767356         | 0.00811006                   | 0.276983                         | -3.61033                          | NC+MYCN down vs NC-CTRL                       | 8.31678      | 1.59149       | 0.510291    | 1        |
| 118 | TMEM37        | TMEM37        | 0.00011638         | 0.000147026                  | 0.277595                         | -3.60236                          | NC+MYCN down vs NC-CTRL                       | 29.2128      | 2.33598       | 0.213238    | 1        |
| 119 | RP11-923I11.7 | RP11-923I11.7 | 0.000486215        | 0.000555349                  | 0.27761                          | -3.60218                          | NC+MYCN down vs NC-CTRL                       | 19.5433      | 386.89        | 52.7908     | 1        |
| 120 | CTD-2555K7.4  | CTD-2555K7.4  | 0.00114756         | 0.000546071                  | 0.279192                         | -3.58177                          | NC+MYCN down vs NC-CTRL                       | 15.1934      | 0.0217638     | 0.00381986  | 1        |
| 121 | RP11-141B14.1 | RP11-141B14.1 | 0.0195867          | 0.0046597                    | 0.280716                         | -3.56232                          | NC+MYCN down vs NC-CTRL                       | 5.94819      | 0.579771      | 0.25992     | 1        |
| 122 | PVRL3-AS1     | PVRL3-AS1     | 0.0109604          | 0.0103009                    | 0.282986                         | -3.53374                          | NC+MYCN down vs NC-CTRL                       | 7.35053      | 0.161452      | 0.0585724   | 1        |
| 123 | STARD8        | STARD8        | 0.0136146          | 0.0108355                    | 0.284167                         | -3.51905                          | NC+MYCN down vs NC-CTRL                       | 6.8031       | 22.5101       | 8.82345     | 1        |
| 124 | S1PR3         | S1PR3         | 0.00524917         | 0.00163808                   | 0.286384                         | -3.49182                          | NC+MYCN down vs NC-CTRL                       | 9.44425      | 43.7305       | 12.3477     | 1        |
| 125 | RP3-525L6.2   | RP3-525L6.2   | 0.019331           | 0.0118884                    | 0.287146                         | -3.48255                          | NC+MYCN down vs NC-CTRL                       | 5.97776      | 0.0785594     | 0.0350452   | 1        |
| 126 | C1QTNF4       | C1QTNF4       | 0.0129093          | 0.00677195                   | 0.287276                         | -3.48098                          | NC+MYCN down vs NC-CTRL                       | 6.93468      | 40.9543       | 15.7486     | 1        |
| 127 | RP11-923I11.4 | RP11-923I11.4 | 0.0217475          | 0.00748198                   | 0.288208                         | -3.46971                          | NC+MYCN down vs NC-CTRL                       | 5.71604      | 0.122734      | 0.0572584   | 1        |
| 128 | PEAR1         | PEAR1         | 0.000275849        | 0.00017374                   | 0.288493                         | -3.46629                          | NC+MYCN down vs NC-CTRL                       | 22.9696      | 88.0254       | 10.2194     | 1        |
| 129 | RP11-403I13.8 | RP11-403I13.8 | 0.0114001          | 0.00687884                   | 0.290087                         | -3.44724                          | NC+MYCN down vs NC-CTRL                       | 7.24903      | 7.97414       | 2.93341     | 1        |

|     | Probeset ID      | Gene Symbol      | p-value(Attribute) | p-value(NC+MYCN vs. NC-CTRL) | MeanRatio(NC+MYCN N vs. NC-CTRL) | FoldChange(NC+MYCN N vs. NC-CTRL) | FoldChange(NC+MYCN vs. NC-CTRL) (Description) | F(Attribute) | SS(Attribute) | SS(Error)   | F(Error) |
|-----|------------------|------------------|--------------------|------------------------------|----------------------------------|-----------------------------------|-----------------------------------------------|--------------|---------------|-------------|----------|
| 130 | GNG11            | GNG11            | 0.00276225         | 0.00417141                   | 0.291597                         | -3.42939                          | NC+MYCN down vs NC-CTRL                       | 11.6099      | 114.345       | 26.2637     | 1        |
| 131 | EBF2             | EBF2             | 0.00794158         | 0.00806035                   | 0.293234                         | -3.41025                          | NC+MYCN down vs NC-CTRL                       | 8.21998      | 42.1639       | 13.6785     | 1        |
| 132 | DIRAS3           | DIRAS3           | 0.00104868         | 0.000365118                  | 0.293337                         | -3.40905                          | NC+MYCN down vs NC-CTRL                       | 15.6074      | 1.22786       | 0.209791    | 1        |
| 133 | AC008088.4       | AC008088.4       | 1.74E-06           | 2.08E-06                     | 0.29408                          | -3.40043                          | NC+MYCN down vs NC-CTRL                       | 89.0366      | 22.465        | 0.672831    | 1        |
| 134 | FILIP1L          | FILIP1L          | 0.0207717          | 0.0109044                    | 0.295524                         | -3.38382                          | NC+MYCN down vs NC-CTRL                       | 5.81714      | 8.76943       | 4.02004     | 1        |
| 135 | RP11-346C20.4    | RP11-346C20.4    | 0.00309999         | 0.0011301                    | 0.296416                         | -3.37363                          | NC+MYCN down vs NC-CTRL                       | 11.1949      | 5.32566       | 1.26859     | 1        |
| 136 | WNT5B            | WNT5B            | 0.0112             | 0.00455475                   | 0.297057                         | -3.36636                          | NC+MYCN down vs NC-CTRL                       | 7.29461      | 6.87417       | 2.51297     | 1        |
| 137 | LINC01011        | LINC01011        | 1.65E-05           | 2.23E-06                     | 0.298475                         | -3.35036                          | NC+MYCN down vs NC-CTRL                       | 49.4883      | 0.788273      | 0.0424759   | 1        |
| 138 | GRAMD1C          | GRAMD1C          | 0.00180354         | 0.00148847                   | 0.300407                         | -3.32882                          | NC+MYCN down vs NC-CTRL                       | 13.2513      | 0.942926      | 0.189753    | 1        |
| 139 | AC002519.8       | AC002519.8       | 0.00349155         | 0.00280627                   | 0.300652                         | -3.3261                           | NC+MYCN down vs NC-CTRL                       | 10.7793      | 0.0433097     | 0.0107143   | 1        |
| 140 | HOTAIRM1         | HOTAIRM1         | 0.00265603         | 0.00371989                   | 0.301473                         | -3.31704                          | NC+MYCN down vs NC-CTRL                       | 11.7538      | 137.363       | 31.1646     | 1        |
| 141 | MAGED4B          | MAGED4B          | 0.00586435         | 0.00104473                   | 0.302528                         | -3.30548                          | NC+MYCN down vs NC-CTRL                       | 9.10415      | 290.962       | 85.2248     | 1        |
| 142 | MMP14            | MMP14            | 0.000628137        | 0.000392068                  | 0.304245                         | -3.28682                          | NC+MYCN down vs NC-CTRL                       | 18.1472      | 1418.57       | 208.453     | 1        |
| 143 | VWASA            | VWASA            | 0.00627382         | 0.00426982                   | 0.305271                         | -3.27578                          | NC+MYCN down vs NC-CTRL                       | 8.90155      | 2.30721       | 0.691177    | 1        |
| 144 | NXPH3            | NXPH3            | 0.000572465        | 0.000748391                  | 0.305723                         | -3.27093                          | NC+MYCN down vs NC-CTRL                       | 18.6428      | 2.95884       | 0.423232    | 1        |
| 145 | JMJD1C-AS1       | JMJD1C-AS1       | 0.0194873          | 0.00491065                   | 0.306458                         | -3.26309                          | NC+MYCN down vs NC-CTRL                       | 5.95962      | 1.16529       | 0.521418    | 1        |
| 146 | TNRC6C-AS1       | TNRC6C-AS1       | 0.00971466         | 0.00403031                   | 0.308561                         | -3.24085                          | NC+MYCN down vs NC-CTRL                       | 7.66804      | 6.00133       | 2.08705     | 1        |
| 147 | AP000662.4       | AP000662.4       | 0.0126832          | 0.00626444                   | 0.30858                          | -3.24065                          | NC+MYCN down vs NC-CTRL                       | 6.97878      | 4.81801       | 1.84101     | 1        |
| 148 | RP11-379K17.4    | RP11-379K17.4    | 0.00900273         | 0.0018168                    | 0.308705                         | -3.23934                          | NC+MYCN down vs NC-CTRL                       | 7.87326      | 0.0201919     | 0.00683899  | 1        |
| 149 | AC002519.6       | AC002519.6       | 4.83E-05           | 0.00524943                   | 0.309948                         | -3.22635                          | NC+MYCN down vs NC-CTRL                       | 37.1126      | 0.0702743     | 0.00504945  | 1        |
| 150 | CCDC80           | CCDC80           | 0.00501375         | 0.002057                     | 0.311555                         | -3.20971                          | NC+MYCN down vs NC-CTRL                       | 9.58783      | 198.483       | 55.2042     | 1        |
| 151 | RP11-264F23.3    | RP11-264F23.3    | 0.00229973         | 0.00352681                   | 0.312342                         | -3.20162                          | NC+MYCN down vs NC-CTRL                       | 12.2942      | 6.74691       | 1.46343     | 1        |
| 152 | AC087380.14      | AC087380.14      | 0.00147975         | 0.00239742                   | 0.312777                         | -3.19717                          | NC+MYCN down vs NC-CTRL                       | 14.0745      | 0.231624      | 0.0438853   | 1        |
| 153 | NCKAP1L          | NCKAP1L          | 0.00396402         | 0.00572934                   | 0.314024                         | -3.18447                          | NC+MYCN down vs NC-CTRL                       | 10.3491      | 0.00160948    | 0.000414717 | 1        |
| 154 | SH3RF2           | SH3RF2           | 0.000642514        | 0.000599568                  | 0.314795                         | -3.17667                          | NC+MYCN down vs NC-CTRL                       | 18.0281      | 0.159082      | 0.023531    | 1        |
| 155 | RP11-214N9.1     | RP11-214N9.1     | 0.00762865         | 0.00176592                   | 0.316116                         | -3.16339                          | NC+MYCN down vs NC-CTRL                       | 8.33342      | 1.9007        | 0.608218    | 1        |
| 156 | RP11-10C24.3     | RP11-10C24.3     | 0.0200562          | 0.00997489                   | 0.317399                         | -3.15061                          | NC+MYCN down vs NC-CTRL                       | 5.89512      | 0.690424      | 0.312314    | 1        |
| 157 | AC093673.5       | AC093673.5       | 9.33E-05           | 0.00589689                   | 0.317748                         | -3.14715                          | NC+MYCN down vs NC-CTRL                       | 31.0394      | 25.0684       | 2.15369     | 1        |
| 158 | AC005013.1       | AC005013.1       | 0.00737579         | 0.00499156                   | 0.317972                         | -3.14494                          | NC+MYCN down vs NC-CTRL                       | 8.42941      | 429.737       | 135.948     | 1        |
| 159 | SLC39A5          | SLC39A5          | 0.0111616          | 0.00812555                   | 0.318957                         | -3.13522                          | NC+MYCN down vs NC-CTRL                       | 7.30348      | 0.00855814    | 0.00312477  | 1        |
| 160 | CTTNBP2          | CTTNBP2          | 0.000521312        | 0.00100796                   | 0.321903                         | -3.10653                          | NC+MYCN down vs NC-CTRL                       | 19.1545      | 116.381       | 16.2025     | 1        |
| 161 | MIR145           | MIR145           | 0.0186589          | 0.00766201                   | 0.323288                         | -3.09321                          | NC+MYCN down vs NC-CTRL                       | 6.05788      | 9.70027       | 4.27004     | 1        |
| 162 | RSPH6A           | RSPH6A           | 9.31E-06           | 2.37E-05                     | 0.324108                         | -3.08539                          | NC+MYCN down vs NC-CTRL                       | 57.5206      | 0.0369432     | 0.00171269  | 1        |
| 163 | RP11-90B9.2      | RP11-90B9.2      | 0.0177469          | 0.00544114                   | 0.325581                         | -3.07143                          | NC+MYCN down vs NC-CTRL                       | 6.17254      | 0.661864      | 0.285939    | 1        |
| 164 | AC092415.1       | AC092415.1       | 0.0196477          | 0.0108437                    | 0.325871                         | -3.0687                           | NC+MYCN down vs NC-CTRL                       | 5.9412       | 0.153506      | 0.0689002   | 1        |
| 165 | SCUBE3           | SCUBE3           | 0.000896493        | 0.00101292                   | 0.327455                         | -3.05386                          | NC+MYCN down vs NC-CTRL                       | 16.3502      | 27.2573       | 4.44559     | 1        |
| 166 | DAB2             | DAB2             | 8.43E-05           | 0.000196057                  | 0.327886                         | -3.04984                          | NC+MYCN down vs NC-CTRL                       | 31.9111      | 31.6486       | 2.64473     | 1        |
| 167 | SSR4P1           | SSR4P1           | 0.0157897          | 0.00486222                   | 0.329615                         | -3.03385                          | NC+MYCN down vs NC-CTRL                       | 6.44545      | 0.505515      | 0.209146    | 1        |
| 168 | SOCS1            | SOCS1            | 0.00236228         | 0.00178722                   | 0.330481                         | -3.02589                          | NC+MYCN down vs NC-CTRL                       | 12.1921      | 5.67172       | 1.24053     | 1        |
| 169 | RP11-923I11.6    | RP11-923I11.6    | 0.00130508         | 0.00195291                   | 0.333109                         | -3.00202                          | NC+MYCN down vs NC-CTRL                       | 14.6184      | 2156.91       | 393.459     | 1        |
| 170 | XXbac-B562F10.11 | XXbac-B562F10.11 | 0.000626263        | 8.13E-05                     | 0.334559                         | -2.98901                          | NC+MYCN down vs NC-CTRL                       | 18.163       | 6.1251        | 0.89928     | 1        |
| 171 | RP11-375N15.2    | RP11-375N15.2    | 0.00616563         | 0.00286391                   | 0.334769                         | -2.98714                          | NC+MYCN down vs NC-CTRL                       | 8.95344      | 0.514518      | 0.153243    | 1        |
| 172 | RP11-406A9.2     | RP11-406A9.2     | 0.00121395         | 0.00227572                   | 0.336388                         | -2.97275                          | NC+MYCN down vs NC-CTRL                       | 14.9398      | 0.980492      | 0.175013    | 1        |

|     | Probeset ID    | Gene Symbol    | p-value(Attribute) | p-value(NC+MYCN vs. NC-CTRL) | MeanRatio(NC+MYCN N vs. NC-CTRL) | FoldChange(NC+MYCN N vs. NC-CTRL) | FoldChange(NC+MYCN vs. NC-CTRL) (Description) | F(Attribute) | SS(Attribute) | SS(Error)  | F(Error) |
|-----|----------------|----------------|--------------------|------------------------------|----------------------------------|-----------------------------------|-----------------------------------------------|--------------|---------------|------------|----------|
| 173 | KEL            | KEL            | 0.000750969        | 0.00048737                   | 0.336607                         | -2.97082                          | NC+MYCN down vs NC-CTRL                       | 17.225       | 0.122699      | 0.0189954  | 1        |
| 174 | WFIKKN1        | WFIKKN1        | 0.00948492         | 0.00746865                   | 0.337812                         | -2.96023                          | NC+MYCN down vs NC-CTRL                       | 7.73216      | 3.25278       | 1.12182    | 1        |
| 175 | AC093620.5     | AC093620.5     | 0.00105984         | 0.00141354                   | 0.337911                         | -2.95936                          | NC+MYCN down vs NC-CTRL                       | 15.5582      | 4.62427       | 0.792596   | 1        |
| 176 | RP11-1008C21.2 | RP11-1008C21.2 | 0.00964995         | 0.00459534                   | 0.337917                         | -2.9593                           | NC+MYCN down vs NC-CTRL                       | 7.68591      | 0.430405      | 0.149331   | 1        |
| 177 | CTC-338M12.5   | CTC-338M12.5   | 0.00261466         | 0.0100896                    | 0.338688                         | -2.95257                          | NC+MYCN down vs NC-CTRL                       | 11.8117      | 0.14381       | 0.0324672  | 1        |
| 178 | UBQLNL         | UBQLNL         | 0.000144681        | 0.000346145                  | 0.341046                         | -2.93216                          | NC+MYCN down vs NC-CTRL                       | 27.509       | 0.571948      | 0.0554434  | 1        |
| 179 | LDB2           | LDB2           | 2.55E-05           | 5.62E-05                     | 0.341299                         | -2.92998                          | NC+MYCN down vs NC-CTRL                       | 44.0523      | 259.858       | 15.7303    | 1        |
| 180 | MIR503HG       | MIR503HG       | 0.00255261         | 0.00124674                   | 0.34208                          | -2.92329                          | NC+MYCN down vs NC-CTRL                       | 11.9008      | 96.4553       | 21.6131    | 1        |
| 181 | RP11-75C9.1    | RP11-75C9.1    | 0.00486446         | 0.0037597                    | 0.342726                         | -2.91778                          | NC+MYCN down vs NC-CTRL                       | 9.68332      | 1.86388       | 0.513291   | 1        |
| 182 | RP11-368I23.3  | RP11-368I23.3  | 0.000109002        | 0.000214948                  | 0.343082                         | -2.91475                          | NC+MYCN down vs NC-CTRL                       | 29.7438      | 1.92524       | 0.172606   | 1        |
| 183 | AC006445.8     | AC006445.8     | 0.00486212         | 0.00832131                   | 0.344025                         | -2.90676                          | NC+MYCN down vs NC-CTRL                       | 9.68484      | 2.36107       | 0.650106   | 1        |
| 184 | YAP1P1         | YAP1P1         | 6.39E-06           | 1.24E-05                     | 0.344994                         | -2.8986                           | NC+MYCN down vs NC-CTRL                       | 63.4969      | 8.6309        | 0.36247    | 1        |
| 185 | RP11-288I21.1  | RP11-288I21.1  | 0.0206091          | 0.00488487                   | 0.344999                         | -2.89856                          | NC+MYCN down vs NC-CTRL                       | 5.83457      | 1.56385       | 0.714751   | 1        |
| 186 | PMP22          | PMP22          | 0.0130393          | 0.00238254                   | 0.346681                         | -2.8845                           | NC+MYCN down vs NC-CTRL                       | 6.90977      | 108.13        | 41.7302    | 1        |
| 187 | ZNF418         | ZNF418         | 0.000910216        | 0.00105919                   | 0.349333                         | -2.8626                           | NC+MYCN down vs NC-CTRL                       | 16.2769      | 14.2579       | 2.33589    | 1        |
| 188 | AC010642.2     | AC010642.2     | 0.0104852          | 0.00406897                   | 0.351892                         | -2.84178                          | NC+MYCN down vs NC-CTRL                       | 7.46606      | 0.178639      | 0.0638048  | 1        |
| 189 | SPG20OS        | SPG20OS        | 0.00431707         | 0.0014168                    | 0.351904                         | -2.84169                          | NC+MYCN down vs NC-CTRL                       | 10.0675      | 1.26174       | 0.334207   | 1        |
| 190 | PRKCQ          | PRKCQ          | 2.18E-05           | 2.68E-05                     | 0.352658                         | -2.83561                          | NC+MYCN down vs NC-CTRL                       | 45.9258      | 2.13268       | 0.123833   | 1        |
| 191 | COL26A1        | COL26A1        | 0.000879922        | 0.00198252                   | 0.353181                         | -2.83141                          | NC+MYCN down vs NC-CTRL                       | 16.4405      | 1153.48       | 187.096    | 1        |
| 192 | C5orf27        | C5orf27        | 0.00965165         | 0.00806638                   | 0.353224                         | -2.83107                          | NC+MYCN down vs NC-CTRL                       | 7.68544      | 0.0192773     | 0.00668877 | 1        |
| 193 | PCDHGB1        | PCDHGB1        | 0.00516817         | 0.00213683                   | 0.353291                         | -2.83053                          | NC+MYCN down vs NC-CTRL                       | 9.49273      | 0.72477       | 0.2036     | 1        |
| 194 | OSGIN1         | OSGIN1         | 0.00338223         | 0.00456011                   | 0.354407                         | -2.82162                          | NC+MYCN down vs NC-CTRL                       | 10.8892      | 4.04605       | 0.990838   | 1        |
| 195 | RP11-227D13.1  | RP11-227D13.1  | 0.000926575        | 0.000855602                  | 0.35485                          | -2.81809                          | NC+MYCN down vs NC-CTRL                       | 16.1914      | 0.398892      | 0.0656962  | 1        |
| 196 | RCBTB2         | RCBTB2         | 3.90E-05           | 5.61E-05                     | 0.356695                         | -2.80351                          | NC+MYCN down vs NC-CTRL                       | 39.3282      | 289.452       | 19.6264    | 1        |
| 197 | U91328.22      | U91328.22      | 0.00615673         | 0.00575975                   | 0.356807                         | -2.80263                          | NC+MYCN down vs NC-CTRL                       | 8.95776      | 0.206995      | 0.061621   | 1        |
| 198 | DNASE1         | DNASE1         | 0.000923327        | 0.000142695                  | 0.357126                         | -2.80013                          | NC+MYCN down vs NC-CTRL                       | 16.2082      | 13.0183       | 2.14185    | 1        |
| 199 | ITGA5          | ITGA5          | 0.00163917         | 0.00169794                   | 0.357266                         | -2.79903                          | NC+MYCN down vs NC-CTRL                       | 13.6438      | 88.549        | 17.3069    | 1        |
| 200 | RP11-799D4.4   | RP11-799D4.4   | 0.000757113        | 0.00171908                   | 0.358311                         | -2.79087                          | NC+MYCN down vs NC-CTRL                       | 17.1839      | 0.11573       | 0.0179595  | 1        |
| 201 | ST8SIA1        | ST8SIA1        | 0.0137796          | 0.009917                     | 0.358649                         | -2.78824                          | NC+MYCN down vs NC-CTRL                       | 6.77354      | 2.03076       | 0.799486   | 1        |
| 202 | RN7SL113P      | RN7SL113P      | 0.0187606          | 0.00375005                   | 0.362488                         | -2.75871                          | NC+MYCN down vs NC-CTRL                       | 6.04552      | 0.240087      | 0.105902   | 1        |
| 203 | RP11-546J1.1   | RP11-546J1.1   | 0.00949944         | 0.00516083                   | 0.363229                         | -2.75308                          | NC+MYCN down vs NC-CTRL                       | 7.72805      | 0.125043      | 0.0431476  | 1        |
| 204 | ZNF547         | ZNF547         | 0.00343501         | 0.00072961                   | 0.363938                         | -2.74772                          | NC+MYCN down vs NC-CTRL                       | 10.8356      | 0.493039      | 0.121338   | 1        |
| 205 | ZNF625-ZNF20   | ZNF625-ZNF20   | 0.000400359        | 0.000100139                  | 0.365085                         | -2.73909                          | NC+MYCN down vs NC-CTRL                       | 20.6636      | 4.07209       | 0.525508   | 1        |
| 206 | DKKL1          | DKKL1          | 0.00363164         | 0.00574633                   | 0.365356                         | -2.73705                          | NC+MYCN down vs NC-CTRL                       | 10.6445      | 2.93947       | 0.736399   | 1        |
| 207 | MIR22HG        | MIR22HG        | 0.00143069         | 0.00170685                   | 0.36771                          | -2.71954                          | NC+MYCN down vs NC-CTRL                       | 14.2188      | 2.77742       | 0.520891   | 1        |
| 208 | PAPSS2         | PAPSS2         | 0.0150502          | 0.00459663                   | 0.369325                         | -2.70764                          | NC+MYCN down vs NC-CTRL                       | 6.55977      | 15.5307       | 6.31352    | 1        |
| 209 | RP11-89K10.2   | RP11-89K10.2   | 0.0146501          | 0.00765779                   | 0.369993                         | -2.70275                          | NC+MYCN down vs NC-CTRL                       | 6.62458      | 1.78456       | 0.718358   | 1        |
| 210 | IDI2-AS1       | IDI2-AS1       | 0.00140959         | 0.00116945                   | 0.371041                         | -2.69512                          | NC+MYCN down vs NC-CTRL                       | 14.2828      | 1.24344       | 0.232156   | 1        |
| 211 | RP11-522I20.3  | RP11-522I20.3  | 0.000606177        | 0.000385436                  | 0.371402                         | -2.6925                           | NC+MYCN down vs NC-CTRL                       | 18.3359      | 4.54211       | 0.660579   | 1        |
| 212 | DKFZP779L1853  | DKFZP779L1853  | 0.00765792         | 0.00622591                   | 0.37188                          | -2.68904                          | NC+MYCN down vs NC-CTRL                       | 8.32256      | 0.031586      | 0.0101206  | 1        |
| 213 | KRBA2          | KRBA2          | 0.0198575          | 0.00354871                   | 0.375261                         | -2.66481                          | NC+MYCN down vs NC-CTRL                       | 5.91739      | 3.32248       | 1.49727    | 1        |
| 214 | IQGAP3         | IQGAP3         | 0.00780697         | 0.00216754                   | 0.377727                         | -2.64742                          | NC+MYCN down vs NC-CTRL                       | 8.26808      | 300.918       | 97.0536    | 1        |
| 215 | LBH            | LBH            | 0.0188503          | 0.00994901                   | 0.377744                         | -2.6473                           | NC+MYCN down vs NC-CTRL                       | 6.0347       | 232.883       | 102.908    | 1        |



|     | Probeset ID   | Gene Symbol   | p-value(Attribute) | p-value(NC+MYCN vs. NC-CTRL) | MeanRatio(NC+MYCN N vs. NC-CTRL) | FoldChange(NC+MYCN N vs. NC-CTRL) | FoldChange(NC+MYCN vs. NC-CTRL) (Description) | F(Attribute) | SS(Attribute) | SS(Error)  | F(Error) |
|-----|---------------|---------------|--------------------|------------------------------|----------------------------------|-----------------------------------|-----------------------------------------------|--------------|---------------|------------|----------|
| 216 | WDR63         | WDR63         | 0.000465676        | 0.00138068                   | 0.378253                         | -2.64374                          | NC+MYCN down vs NC-CTRL                       | 19.7875      | 0.82145       | 0.110703   | 1        |
| 217 | RP11-500G22.2 | RP11-500G22.2 | 0.000161475        | 0.000142108                  | 0.378747                         | -2.64028                          | NC+MYCN down vs NC-CTRL                       | 26.684       | 4.18814       | 0.418543   | 1        |
| 218 | C1orf51       | C1orf51       | 0.000784433        | 0.0108393                    | 0.379648                         | -2.63402                          | NC+MYCN down vs NC-CTRL                       | 17.0061      | 11.2715       | 1.76745    | 1        |
| 219 | RP3-428L16.2  | RP3-428L16.2  | 0.00159807         | 0.00118952                   | 0.382159                         | -2.61671                          | NC+MYCN down vs NC-CTRL                       | 13.7496      | 8.31968       | 1.61356    | 1        |
| 220 | ADAM19        | ADAM19        | 0.00222556         | 0.00311991                   | 0.382458                         | -2.61467                          | NC+MYCN down vs NC-CTRL                       | 12.42        | 20.3495       | 4.36919    | 1        |
| 221 | RP11-369G6.2  | RP11-369G6.2  | 0.00654251         | 0.00211676                   | 0.383707                         | -2.60615                          | NC+MYCN down vs NC-CTRL                       | 8.77737      | 0.421476      | 0.128049   | 1        |
| 222 | RAG1          | RAG1          | 0.00791002         | 0.00391361                   | 0.383765                         | -2.60576                          | NC+MYCN down vs NC-CTRL                       | 8.23117      | 0.353415      | 0.114497   | 1        |
| 223 | FAM110B       | FAM110B       | 0.000133359        | 0.000265818                  | 0.384142                         | -2.60321                          | NC+MYCN down vs NC-CTRL                       | 28.136       | 62.4571       | 5.91953    | 1        |
| 224 | L1TD1         | L1TD1         | 0.00167548         | 0.00461291                   | 0.384642                         | -2.59982                          | NC+MYCN down vs NC-CTRL                       | 13.553       | 696.297       | 137.003    | 1        |
| 225 | SLC7A3        | SLC7A3        | 0.00545238         | 0.0100678                    | 0.384841                         | -2.59848                          | NC+MYCN down vs NC-CTRL                       | 9.32663      | 18.6351       | 5.32815    | 1        |
| 226 | SIPA1         | SIPA1         | 0.00277951         | 0.00123745                   | 0.384952                         | -2.59772                          | NC+MYCN down vs NC-CTRL                       | 11.5872      | 23.8805       | 5.49582    | 1        |
| 227 | TMEM200C      | TMEM200C      | 0.00123795         | 0.00205641                   | 0.386553                         | -2.58697                          | NC+MYCN down vs NC-CTRL                       | 14.8523      | 8.89623       | 1.59728    | 1        |
| 228 | COL23A1       | COL23A1       | 0.000807962        | 0.00200051                   | 0.386967                         | -2.5842                           | NC+MYCN down vs NC-CTRL                       | 16.859       | 85.709        | 13.557     | 1        |
| 229 | SYDE1         | SYDE1         | 0.00211707         | 0.000827441                  | 0.387277                         | -2.58213                          | NC+MYCN down vs NC-CTRL                       | 12.6136      | 36.7248       | 7.76404    | 1        |
| 230 | C1GALT1       | C1GALT1       | 0.000304323        | 6.84E-05                     | 0.388213                         | -2.5759                           | NC+MYCN down vs NC-CTRL                       | 22.3405      | 84.0742       | 10.0355    | 1        |
| 231 | COL25A1       | COL25A1       | 0.000838363        | 0.00169609                   | 0.389565                         | -2.56697                          | NC+MYCN down vs NC-CTRL                       | 16.6768      | 450.054       | 71.9651    | 1        |
| 232 | ZBTB16        | ZBTB16        | 0.00220145         | 0.00586509                   | 0.38974                          | -2.56581                          | NC+MYCN down vs NC-CTRL                       | 12.462       | 3.75344       | 0.803176   | 1        |
| 233 | SEC24B-AS1    | SEC24B-AS1    | 0.000842323        | 0.000583133                  | 0.393364                         | -2.54217                          | NC+MYCN down vs NC-CTRL                       | 16.6536      | 0.555964      | 0.0890239  | 1        |
| 234 | PARVA         | PARVA         | 0.00793043         | 0.00490293                   | 0.393526                         | -2.54113                          | NC+MYCN down vs NC-CTRL                       | 8.22392      | 50.7931       | 16.47      | 1        |
| 235 | C6orf226      | C6orf226      | 0.0162492          | 0.00316335                   | 0.393629                         | -2.54046                          | NC+MYCN down vs NC-CTRL                       | 6.37772      | 4.26247       | 1.78223    | 1        |
| 236 | NDUFAF4P3     | NDUFAF4P3     | 0.00824608         | 0.00762995                   | 0.395293                         | -2.52977                          | NC+MYCN down vs NC-CTRL                       | 8.11483      | 1.95704       | 0.643114   | 1        |
| 237 | KITLG         | KITLG         | 0.0120073          | 0.0100822                    | 0.395605                         | -2.52777                          | NC+MYCN down vs NC-CTRL                       | 7.11665      | 159.26        | 59.6761    | 1        |
| 238 | RP6-206I17.3  | RP6-206I17.3  | 0.00128835         | 0.0040576                    | 0.395727                         | -2.52699                          | NC+MYCN down vs NC-CTRL                       | 14.6753      | 49.9815       | 9.08218    | 1        |
| 239 | C1orf106      | C1orf106      | 1.03E-05           | 4.22E-05                     | 0.397676                         | -2.51461                          | NC+MYCN down vs NC-CTRL                       | 56.0209      | 118.517       | 5.64154    | 1        |
| 240 | GCNT1         | GCNT1         | 0.00134061         | 0.00397302                   | 0.398866                         | -2.50711                          | NC+MYCN down vs NC-CTRL                       | 14.5007      | 36.1719       | 6.65198    | 1        |
| 241 | RP11-155O18.6 | RP11-155O18.6 | 0.0016307          | 0.000754807                  | 0.401797                         | -2.48882                          | NC+MYCN down vs NC-CTRL                       | 13.6653      | 2.59894       | 0.50716    | 1        |
| 242 | RP11-100G15.7 | RP11-100G15.7 | 0.00498732         | 0.00300073                   | 0.404133                         | -2.47443                          | NC+MYCN down vs NC-CTRL                       | 9.60447      | 0.0241496     | 0.00670511 | 1        |
| 243 | ZNF214        | ZNF214        | 1.99E-05           | 2.41E-05                     | 0.404489                         | -2.47226                          | NC+MYCN down vs NC-CTRL                       | 47.0391      | 10.0628       | 0.570468   | 1        |
| 244 | RP11-25H12.1  | RP11-25H12.1  | 0.00174495         | 0.00470014                   | 0.406059                         | -2.46269                          | NC+MYCN down vs NC-CTRL                       | 13.3859      | 3.01922       | 0.601473   | 1        |
| 245 | RP11-708J19.1 | RP11-708J19.1 | 0.0208622          | 0.00428811                   | 0.407493                         | -2.45403                          | NC+MYCN down vs NC-CTRL                       | 5.80752      | 0.820091      | 0.376565   | 1        |
| 246 | ZNF136        | ZNF136        | 0.00706054         | 0.00125861                   | 0.407801                         | -2.45218                          | NC+MYCN down vs NC-CTRL                       | 8.555        | 3.19312       | 0.995324   | 1        |
| 247 | TRIL          | TRIL          | 0.000583878        | 0.00138832                   | 0.40977                          | -2.44039                          | NC+MYCN down vs NC-CTRL                       | 18.5364      | 649.122       | 93.3832    | 1        |
| 248 | PLEKHG1       | PLEKHG1       | 6.20E-06           | 3.71E-05                     | 0.41048                          | -2.43617                          | NC+MYCN down vs NC-CTRL                       | 63.9866      | 16.5651       | 0.690355   | 1        |
| 249 | AJUBA         | AJUBA         | 0.0111438          | 0.00948249                   | 0.412006                         | -2.42715                          | NC+MYCN down vs NC-CTRL                       | 7.30758      | 16.0804       | 5.86801    | 1        |
| 250 | ZNF137P       | ZNF137P       | 0.00154114         | 0.000339809                  | 0.412699                         | -2.42307                          | NC+MYCN down vs NC-CTRL                       | 13.9021      | 3.21164       | 0.616052   | 1        |
| 251 | CTC-428G20.6  | CTC-428G20.6  | 0.0086776          | 0.00873668                   | 0.412762                         | -2.4227                           | NC+MYCN down vs NC-CTRL                       | 7.97384      | 0.136658      | 0.0457021  | 1        |
| 252 | RP11-108M12.3 | RP11-108M12.3 | 0.000786658        | 0.00194624                   | 0.413367                         | -2.41916                          | NC+MYCN down vs NC-CTRL                       | 16.992       | 0.259575      | 0.040737   | 1        |
| 253 | AC069277.2    | AC069277.2    | 0.00346021         | 0.00773372                   | 0.415879                         | -2.40454                          | NC+MYCN down vs NC-CTRL                       | 10.8103      | 0.124165      | 0.0306288  | 1        |
| 254 | ERBB2         | ERBB2         | 0.000391917        | 0.00134381                   | 0.417715                         | -2.39397                          | NC+MYCN down vs NC-CTRL                       | 20.7898      | 85.9742       | 11.0277    | 1        |
| 255 | LINC00324     | LINC00324     | 0.0107519          | 0.00579793                   | 0.419663                         | -2.38287                          | NC+MYCN down vs NC-CTRL                       | 7.40043      | 0.209407      | 0.0754577  | 1        |
| 256 | KIF4B         | KIF4B         | 0.0131903          | 0.00293898                   | 0.420587                         | -2.37763                          | NC+MYCN down vs NC-CTRL                       | 6.88121      | 0.972137      | 0.376731   | 1        |
| 257 | TMEM47        | TMEM47        | 3.07E-05           | 0.000195767                  | 0.421786                         | -2.37087                          | NC+MYCN down vs NC-CTRL                       | 41.9216      | 42.1242       | 2.67956    | 1        |
| 258 | HS1BP3        | HS1BP3        | 0.000105242        | 3.56E-05                     | 0.422003                         | -2.36965                          | NC+MYCN down vs NC-CTRL                       | 30.0321      | 6.00821       | 0.533493   | 1        |

|     | Probeset ID   | Gene Symbol   | p-value(Attribute) | p-value(NC+MYCN vs. NC-CTRL) | MeanRatio(NC+MYCN N vs. NC-CTRL) | FoldChange(NC+MYCN N vs. NC-CTRL) | FoldChange(NC+MYCN vs. NC-CTRL) (Description) | F(Attribute) | SS(Attribute) | SS(Error) | F(Error) |
|-----|---------------|---------------|--------------------|------------------------------|----------------------------------|-----------------------------------|-----------------------------------------------|--------------|---------------|-----------|----------|
| 259 | RP11-512M8.3  | RP11-512M8.3  | 0.0136119          | 0.00780011                   | 0.422267                         | -2.36817                          | NC+MYCN down vs NC-CTRL                       | 6.80359      | 4.51882       | 1.77115   | 1        |
| 260 | UBXN7-AS1     | UBXN7-AS1     | 0.0189631          | 0.00772022                   | 0.422489                         | -2.36692                          | NC+MYCN down vs NC-CTRL                       | 6.02117      | 0.0746256     | 0.0330503 | 1        |
| 261 | IFIT1         | IFIT1         | 0.00140017         | 0.00211746                   | 0.422603                         | -2.36628                          | NC+MYCN down vs NC-CTRL                       | 14.3118      | 11.5419       | 2.15056   | 1        |
| 262 | SESN2         | SESN2         | 5.81E-05           | 9.50E-05                     | 0.423287                         | -2.36246                          | NC+MYCN down vs NC-CTRL                       | 35.313       | 161.705       | 12.2112   | 1        |
| 263 | LASP1         | LASP1         | 0.00396715         | 0.00122353                   | 0.424279                         | -2.35694                          | NC+MYCN down vs NC-CTRL                       | 10.3465      | 450.715       | 116.165   | 1        |
| 264 | STAT6         | STAT6         | 0.00143317         | 0.00322306                   | 0.425507                         | -2.35014                          | NC+MYCN down vs NC-CTRL                       | 14.2114      | 242.168       | 45.4412   | 1        |
| 265 | RP11-474G23.3 | RP11-474G23.3 | 1.46E-06           | 1.47E-06                     | 0.425912                         | -2.3479                           | NC+MYCN down vs NC-CTRL                       | 93.1497      | 1.64105       | 0.0469795 | 1        |
| 266 | ARL6IP1       | ARL6IP1       | 0.00577146         | 0.000839466                  | 0.426433                         | -2.34503                          | NC+MYCN down vs NC-CTRL                       | 9.15257      | 6142.51       | 1789.67   | 1        |
| 267 | TSPAN10       | TSPAN10       | 0.00101968         | 0.00259141                   | 0.427479                         | -2.3393                           | NC+MYCN down vs NC-CTRL                       | 15.7381      | 0.128207      | 0.0217234 | 1        |
| 268 | RP4-730K3.3   | RP4-730K3.3   | 0.000650286        | 0.000258514                  | 0.427973                         | -2.33659                          | NC+MYCN down vs NC-CTRL                       | 17.965       | 3.16045       | 0.469126  | 1        |
| 269 | FTL           | FTL           | 0.0122901          | 0.00481285                   | 0.429711                         | -2.32715                          | NC+MYCN down vs NC-CTRL                       | 7.05783      | 764279        | 288768    | 1        |
| 270 | AP000347.4    | AP000347.4    | 0.00480435         | 0.00384382                   | 0.430045                         | -2.32534                          | NC+MYCN down vs NC-CTRL                       | 9.7228       | 3.6215        | 0.993268  | 1        |
| 271 | HIST1H2AG     | HIST1H2AG     | 0.000245076        | 3.45E-05                     | 0.433025                         | -2.30934                          | NC+MYCN down vs NC-CTRL                       | 23.7478      | 0.921869      | 0.103518  | 1        |
| 272 | TESK1         | TESK1         | 0.0058868          | 0.00101218                   | 0.433198                         | -2.30842                          | NC+MYCN down vs NC-CTRL                       | 9.09259      | 27.1594       | 7.9653    | 1        |
| 273 | ZNF211        | ZNF211        | 0.000108362        | 1.99E-05                     | 0.43326                          | -2.30809                          | NC+MYCN down vs NC-CTRL                       | 29.792       | 25.007        | 2.23836   | 1        |
| 274 | MAGEE1        | MAGEE1        | 0.000898483        | 0.000192669                  | 0.434899                         | -2.29939                          | NC+MYCN down vs NC-CTRL                       | 16.3395      | 3.9182        | 0.639465  | 1        |
| 275 | C19orf57      | C19orf57      | 0.00929805         | 0.00551418                   | 0.437619                         | -2.28509                          | NC+MYCN down vs NC-CTRL                       | 7.78576      | 3.07756       | 1.05408   | 1        |
| 276 | KIAA1841      | KIAA1841      | 0.000133978        | 2.59E-05                     | 0.438212                         | -2.282                            | NC+MYCN down vs NC-CTRL                       | 28.1001      | 15.4875       | 1.46974   | 1        |
| 277 | AFAP1L2       | AFAP1L2       | 0.00294873         | 0.00895814                   | 0.439354                         | -2.27607                          | NC+MYCN down vs NC-CTRL                       | 11.3734      | 43.9622       | 10.3076   | 1        |
| 278 | RP11-266L9.6  | RP11-266L9.6  | 0.00705404         | 0.0062851                    | 0.439685                         | -2.27436                          | NC+MYCN down vs NC-CTRL                       | 8.55766      | 0.477073      | 0.148661  | 1        |
| 279 | ATF5          | ATF5          | 0.00474347         | 0.0038457                    | 0.439811                         | -2.2737                           | NC+MYCN down vs NC-CTRL                       | 9.76342      | 17.2314       | 4.70639   | 1        |
| 280 | ZNF784        | ZNF784        | 6.81E-05           | 1.10E-05                     | 0.440029                         | -2.27258                          | NC+MYCN down vs NC-CTRL                       | 33.8231      | 6.94726       | 0.547733  | 1        |
| 281 | SLC16A13      | SLC16A13      | 0.00590037         | 0.00704435                   | 0.441171                         | -2.26669                          | NC+MYCN down vs NC-CTRL                       | 9.08562      | 5.69031       | 1.67013   | 1        |
| 282 | ZCWPW1        | ZCWPW1        | 0.00411329         | 0.00204534                   | 0.441635                         | -2.26431                          | NC+MYCN down vs NC-CTRL                       | 10.2264      | 0.699404      | 0.182379  | 1        |
| 283 | AP003068.18   | AP003068.18   | 7.14E-05           | 0.00881914                   | 0.443368                         | -2.25546                          | NC+MYCN down vs NC-CTRL                       | 33.386       | 1.12652       | 0.0899791 | 1        |
| 284 | TNFRSF19      | TNFRSF19      | 0.000316007        | 0.00136633                   | 0.444098                         | -2.25176                          | NC+MYCN down vs NC-CTRL                       | 22.1033      | 3650.31       | 440.393   | 1        |
| 285 | PLS3          | PLS3          | 0.00145158         | 0.00452211                   | 0.444111                         | -2.25169                          | NC+MYCN down vs NC-CTRL                       | 14.1566      | 24900.3       | 4690.44   | 1        |
| 286 | C6ORF50       | C6ORF50       | 0.00050502         | 0.000452679                  | 0.444486                         | -2.24979                          | NC+MYCN down vs NC-CTRL                       | 19.3308      | 6.32005       | 0.871846  | 1        |
| 287 | ZNF730        | ZNF730        | 0.000209221        | 0.000273104                  | 0.445428                         | -2.24503                          | NC+MYCN down vs NC-CTRL                       | 24.8252      | 54.5192       | 5.85633   | 1        |
| 288 | ZNF83         | ZNF83         | 0.00718174         | 0.00607469                   | 0.445555                         | -2.24439                          | NC+MYCN down vs NC-CTRL                       | 8.5059       | 21.7501       | 6.81882   | 1        |
| 289 | CCNG2         | CCNG2         | 0.0181563          | 0.00542136                   | 0.445916                         | -2.24258                          | NC+MYCN down vs NC-CTRL                       | 6.12017      | 80.251        | 34.9668   | 1        |
| 290 | LPP-AS2       | LPP-AS2       | 3.15E-05           | 9.88E-05                     | 0.446971                         | -2.23728                          | NC+MYCN down vs NC-CTRL                       | 41.6487      | 2.37356       | 0.151973  | 1        |
| 291 | BCL7C         | BCL7C         | 1.11E-05           | 3.77E-06                     | 0.447687                         | -2.2337                           | NC+MYCN down vs NC-CTRL                       | 54.8804      | 46.6434       | 2.26643   | 1        |
| 292 | CTD-2369P2.2  | CTD-2369P2.2  | 0.00389883         | 0.0016248                    | 0.448487                         | -2.22972                          | NC+MYCN down vs NC-CTRL                       | 10.4046      | 28.8878       | 7.40389   | 1        |
| 293 | FAM212A       | FAM212A       | 2.60E-06           | 1.63E-05                     | 0.449218                         | -2.22609                          | NC+MYCN down vs NC-CTRL                       | 80.2787      | 154.046       | 5.11705   | 1        |
| 294 | NDE1          | NDE1          | 0.00286573         | 0.000490886                  | 0.449596                         | -2.22422                          | NC+MYCN down vs NC-CTRL                       | 11.4763      | 15.1047       | 3.50977   | 1        |
| 295 | AKAP3         | AKAP3         | 0.00147748         | 0.00449886                   | 0.449984                         | -2.2223                           | NC+MYCN down vs NC-CTRL                       | 14.081       | 0.120556      | 0.0228309 | 1        |
| 296 | RP11-461M2.2  | RP11-461M2.2  | 0.00223508         | 0.00756397                   | 0.450943                         | -2.21757                          | NC+MYCN down vs NC-CTRL                       | 12.4035      | 0.30765       | 0.0661424 | 1        |
| 297 | RNF224        | RNF224        | 0.00458291         | 0.00414007                   | 0.45282                          | -2.20838                          | NC+MYCN down vs NC-CTRL                       | 9.87376      | 0.528687      | 0.142786  | 1        |
| 298 | ZYX           | ZYX           | 5.26E-05           | 0.00393027                   | 0.453418                         | -2.20547                          | NC+MYCN down vs NC-CTRL                       | 36.2721      | 1610.51       | 118.402   | 1        |
| 299 | CRISPLD1      | CRISPLD1      | 0.0175343          | 0.0108144                    | 0.453425                         | -2.20543                          | NC+MYCN down vs NC-CTRL                       | 6.20032      | 161.021       | 69.2527   | 1        |
| 300 | TNFRSF1A      | TNFRSF1A      | 0.00767233         | 0.00593622                   | 0.454268                         | -2.20134                          | NC+MYCN down vs NC-CTRL                       | 8.31724      | 101.531       | 32.5527   | 1        |
| 301 | ARMC7         | ARMC7         | 0.00219585         | 0.00953897                   | 0.454397                         | -2.20072                          | NC+MYCN down vs NC-CTRL                       | 12.4718      | 19.1567       | 4.096     | 1        |

|     | Probeset ID   | Gene Symbol   | p-value(Attribute) | p-value(NC+MYCN vs. NC-CTRL) | MeanRatio(NC+MYCN N vs. NC-CTRL) | FoldChange(NC+MYCN N vs. NC-CTRL) | FoldChange(NC+MYCN vs. NC-CTRL) (Description) | F(Attribute) | SS(Attribute) | SS(Error)  | F(Error) |
|-----|---------------|---------------|--------------------|------------------------------|----------------------------------|-----------------------------------|-----------------------------------------------|--------------|---------------|------------|----------|
| 302 | CYTH2         | CYTH2         | 0.0185144          | 0.00478509                   | 0.454597                         | -2.19975                          | NC+MYCN down vs NC-CTRL                       | 6.07557      | 166.446       | 73.0559    | 1        |
| 303 | IGDCC3        | IGDCC3        | 0.000135401        | 0.00090512                   | 0.455169                         | -2.19699                          | NC+MYCN down vs NC-CTRL                       | 28.0181      | 5586.63       | 531.716    | 1        |
| 304 | MYL6          | MYL6          | 0.000284294        | 4.24E-05                     | 0.455239                         | -2.19665                          | NC+MYCN down vs NC-CTRL                       | 22.7749      | 1060.97       | 124.227    | 1        |
| 305 | ZNF530        | ZNF530        | 0.00309698         | 0.0071392                    | 0.455513                         | -2.19533                          | NC+MYCN down vs NC-CTRL                       | 11.1984      | 3.72905       | 0.887998   | 1        |
| 306 | RAB15         | RAB15         | 0.0118437          | 0.00244038                   | 0.456157                         | -2.19223                          | NC+MYCN down vs NC-CTRL                       | 7.15148      | 25.5082       | 9.51158    | 1        |
| 307 | AC007228.11   | AC007228.11   | 0.0023648          | 0.0010782                    | 0.456238                         | -2.19184                          | NC+MYCN down vs NC-CTRL                       | 12.188       | 1.1937        | 0.261174   | 1        |
| 308 | RP11-82L2.1   | RP11-82L2.1   | 0.00391688         | 0.00630458                   | 0.457178                         | -2.18733                          | NC+MYCN down vs NC-CTRL                       | 10.3891      | 0.0198509     | 0.00509533 | 1        |
| 309 | TRIM68        | TRIM68        | 0.000889379        | 0.000312753                  | 0.458113                         | -2.18287                          | NC+MYCN down vs NC-CTRL                       | 16.3887      | 4.84311       | 0.78804    | 1        |
| 310 | NR2F1-AS1     | NR2F1-AS1     | 0.00018114         | 0.000692915                  | 0.458469                         | -2.18117                          | NC+MYCN down vs NC-CTRL                       | 25.8445      | 27.4599       | 2.83335    | 1        |
| 311 | RP11-529H20.6 | RP11-529H20.6 | 0.000509132        | 0.000746385                  | 0.45863                          | -2.18041                          | NC+MYCN down vs NC-CTRL                       | 19.2856      | 1.70254       | 0.235414   | 1        |
| 312 | ZNF189        | ZNF189        | 0.000650611        | 0.000110539                  | 0.458983                         | -2.17873                          | NC+MYCN down vs NC-CTRL                       | 17.9624      | 63.2838       | 9.39499    | 1        |
| 313 | PLEKHG2       | PLEKHG2       | 0.00888944         | 0.00228101                   | 0.459202                         | -2.17769                          | NC+MYCN down vs NC-CTRL                       | 7.90778      | 137.583       | 46.3957    | 1        |
| 314 | RP11-398E10.1 | RP11-398E10.1 | 0.000174883        | 0.00107271                   | 0.459244                         | -2.17749                          | NC+MYCN down vs NC-CTRL                       | 26.0987      | 0.154469      | 0.0157831  | 1        |
| 315 | SERPINH1      | SERPINH1      | 0.00220054         | 0.0031321                    | 0.460654                         | -2.17083                          | NC+MYCN down vs NC-CTRL                       | 12.4636      | 1757.47       | 376.024    | 1        |
| 316 | ZNF79         | ZNF79         | 0.00143195         | 0.000487737                  | 0.460791                         | -2.17018                          | NC+MYCN down vs NC-CTRL                       | 14.215       | 4.04808       | 0.759399   | 1        |
| 317 | GPR137        | GPR137        | 0.0210755          | 0.0114441                    | 0.460867                         | -2.16983                          | NC+MYCN down vs NC-CTRL                       | 5.78504      | 29.6737       | 13.6784    | 1        |
| 318 | ADH6          | ADH6          | 0.00258515         | 0.00525137                   | 0.460882                         | -2.16975                          | NC+MYCN down vs NC-CTRL                       | 11.8538      | 0.168155      | 0.0378288  | 1        |
| 319 | GPX8          | GPX8          | 7.00E-06           | 7.25E-05                     | 0.461511                         | -2.1668                           | NC+MYCN down vs NC-CTRL                       | 62.006       | 833.034       | 35.8259    | 1        |
| 320 | RP11-7F18.2   | RP11-7F18.2   | 0.00449459         | 0.00835331                   | 0.462731                         | -2.16108                          | NC+MYCN down vs NC-CTRL                       | 9.93654      | 2.06018       | 0.55289    | 1        |
| 321 | SMTN          | SMTN          | 0.00561502         | 0.00344602                   | 0.462922                         | -2.16019                          | NC+MYCN down vs NC-CTRL                       | 9.23637      | 15.251        | 4.40318    | 1        |
| 322 | CCDC121       | CCDC121       | 0.00903142         | 0.00202865                   | 0.462997                         | -2.15984                          | NC+MYCN down vs NC-CTRL                       | 7.8646       | 5.23036       | 1.77347    | 1        |
| 323 | KDM8          | KDM8          | 0.000892953        | 0.000172789                  | 0.464291                         | -2.15382                          | NC+MYCN down vs NC-CTRL                       | 16.3693      | 1.12049       | 0.182534   | 1        |
| 324 | CTD-2623N2.3  | CTD-2623N2.3  | 0.00137148         | 0.00163397                   | 0.464743                         | -2.15173                          | NC+MYCN down vs NC-CTRL                       | 14.4015      | 4.14391       | 0.767311   | 1        |
| 325 | CASC5         | CASC5         | 3.46E-05           | 8.59E-06                     | 0.465962                         | -2.1461                           | NC+MYCN down vs NC-CTRL                       | 40.6095      | 129.404       | 8.49746    | 1        |
| 326 | GPCPD1        | GPCPD1        | 0.000564414        | 0.000704316                  | 0.466715                         | -2.14263                          | NC+MYCN down vs NC-CTRL                       | 18.7195      | 39.6709       | 5.65128    | 1        |
| 327 | NEXN          | NEXN          | 0.00082138         | 0.00355439                   | 0.466867                         | -2.14194                          | NC+MYCN down vs NC-CTRL                       | 16.7776      | 8.1446        | 1.29452    | 1        |
| 328 | ZNF404        | ZNF404        | 0.00885326         | 0.0024504                    | 0.466923                         | -2.14168                          | NC+MYCN down vs NC-CTRL                       | 7.91892      | 3.44269       | 1.15931    | 1        |
| 329 | FBXO43        | FBXO43        | 8.18E-05           | 0.000385926                  | 0.467271                         | -2.14009                          | NC+MYCN down vs NC-CTRL                       | 32.1777      | 3.91089       | 0.324108   | 1        |
| 330 | MANEA-AS1     | MANEA-AS1     | 0.00608414         | 0.00369318                   | 0.467799                         | -2.13767                          | NC+MYCN down vs NC-CTRL                       | 8.99328      | 0.751162      | 0.222733   | 1        |
| 331 | SMPD1         | SMPD1         | 0.00047783         | 0.00656391                   | 0.468469                         | -2.13461                          | NC+MYCN down vs NC-CTRL                       | 19.6414      | 32.386        | 4.39697    | 1        |
| 332 | ABHD4         | ABHD4         | 3.93E-05           | 0.000167948                  | 0.468522                         | -2.13437                          | NC+MYCN down vs NC-CTRL                       | 39.243       | 128.213       | 8.7124     | 1        |
| 333 | APLF          | APLF          | 3.77E-06           | 4.18E-06                     | 0.468933                         | -2.1325                           | NC+MYCN down vs NC-CTRL                       | 72.8442      | 2.3724        | 0.0868483  | 1        |
| 334 | RP11-81N13.1  | RP11-81N13.1  | 0.00050245         | 0.00529011                   | 0.469831                         | -2.12842                          | NC+MYCN down vs NC-CTRL                       | 19.3592      | 0.0495856     | 0.00683023 | 1        |
| 335 | AMOTL2        | AMOTL2        | 0.00660457         | 0.00760738                   | 0.469915                         | -2.12804                          | NC+MYCN down vs NC-CTRL                       | 8.74959      | 69.2159       | 21.0954    | 1        |
| 336 | FAM102A       | FAM102A       | 0.00467014         | 0.00145196                   | 0.471582                         | -2.12052                          | NC+MYCN down vs NC-CTRL                       | 9.81323      | 14.6894       | 3.99172    | 1        |
| 337 | CMTM3         | CMTM3         | 1.90E-05           | 2.60E-05                     | 0.472069                         | -2.11833                          | NC+MYCN down vs NC-CTRL                       | 47.6489      | 433.095       | 24.2381    | 1        |
| 338 | PHLDB1        | PHLDB1        | 0.00338067         | 0.00258828                   | 0.472586                         | -2.11602                          | NC+MYCN down vs NC-CTRL                       | 10.8908      | 34.746        | 8.50771    | 1        |
| 339 | BRPF3         | BRPF3         | 0.0145475          | 0.00255598                   | 0.472779                         | -2.11515                          | NC+MYCN down vs NC-CTRL                       | 6.64155      | 89.8819       | 36.0887    | 1        |
| 340 | ZNF701        | ZNF701        | 0.00613327         | 0.000962041                  | 0.473539                         | -2.11176                          | NC+MYCN down vs NC-CTRL                       | 8.96918      | 0.956089      | 0.284259   | 1        |
| 341 | PIR           | PIR           | 0.00689824         | 0.00433161                   | 0.474913                         | -2.10565                          | NC+MYCN down vs NC-CTRL                       | 8.62242      | 437.216       | 135.218    | 1        |
| 342 | IRF7          | IRF7          | 0.00492819         | 0.00341483                   | 0.475086                         | -2.10488                          | NC+MYCN down vs NC-CTRL                       | 9.64211      | 1.28797       | 0.356207   | 1        |
| 343 | SPRY3         | SPRY3         | 0.0141743          | 0.00947901                   | 0.475091                         | -2.10486                          | NC+MYCN down vs NC-CTRL                       | 6.70459      | 0.146894      | 0.0584254  | 1        |
| 344 | XKR5          | XKR5          | 0.000126472        | 3.94E-05                     | 0.475896                         | -2.1013                           | NC+MYCN down vs NC-CTRL                       | 28.5509      | 18.3683       | 1.7156     | 1        |

|     | Probeset ID   | Gene Symbol   | p-value(Attribute) | p-value(NC+MYCN vs. NC-CTRL) | MeanRatio(NC+MYCN N vs. NC-CTRL) | FoldChange(NC+MYCN N vs. NC-CTRL) | FoldChange(NC+MYCN vs. NC-CTRL) (Description) | F(Attribute) | SS(Attribute) | SS(Error)   | F(Error) |
|-----|---------------|---------------|--------------------|------------------------------|----------------------------------|-----------------------------------|-----------------------------------------------|--------------|---------------|-------------|----------|
| 345 | ZNF329        | ZNF329        | 0.00225427         | 0.000401201                  | 0.476204                         | -2.09994                          | NC+MYCN down vs NC-CTRL                       | 12.3707      | 4.76872       | 1.02796     | 1        |
| 346 | MTTP          | MTTP          | 0.0134565          | 0.00970813                   | 0.476772                         | -2.09744                          | NC+MYCN down vs NC-CTRL                       | 6.83185      | 0.00145743    | 0.000568877 | 1        |
| 347 | C9orf170      | C9orf170      | 0.00248856         | 0.0072272                    | 0.477413                         | -2.09462                          | NC+MYCN down vs NC-CTRL                       | 11.9957      | 0.0201519     | 0.0044798   | 1        |
| 348 | RP11-696N14.1 | RP11-696N14.1 | 1.58E-06           | 4.90E-06                     | 0.477633                         | -2.09366                          | NC+MYCN down vs NC-CTRL                       | 91.2281      | 2.11462       | 0.0618118   | 1        |
| 349 | RNU6-312P     | RNU6-312P     | 0.0230856          | 0.00725756                   | 0.477741                         | -2.09318                          | NC+MYCN down vs NC-CTRL                       | 5.58623      | 10.7839       | 5.14786     | 1        |
| 350 | NDC80         | NDC80         | 9.50E-05           | 4.11E-05                     | 0.477964                         | -2.09221                          | NC+MYCN down vs NC-CTRL                       | 30.8839      | 222.905       | 19.2467     | 1        |
| 351 | YAP1          | YAP1          | 1.73E-06           | 1.99E-05                     | 0.478082                         | -2.09169                          | NC+MYCN down vs NC-CTRL                       | 89.1186      | 3517.73       | 105.26      | 1        |
| 352 | TP53TG1       | TP53TG1       | 0.00202619         | 0.00164172                   | 0.478607                         | -2.0894                           | NC+MYCN down vs NC-CTRL                       | 12.7857      | 55.2569       | 11.5248     | 1        |
| 353 | H2AFX         | H2AFX         | 0.0153114          | 0.00308361                   | 0.479014                         | -2.08762                          | NC+MYCN down vs NC-CTRL                       | 6.5186       | 3676.63       | 1504.05     | 1        |
| 354 | GS1-24F4.2    | GS1-24F4.2    | 0.00628795         | 0.0117391                    | 0.479498                         | -2.08551                          | NC+MYCN down vs NC-CTRL                       | 8.89485      | 3.39963       | 1.0192      | 1        |
| 355 | CHST2         | CHST2         | 0.00636798         | 0.00801302                   | 0.481401                         | -2.07727                          | NC+MYCN down vs NC-CTRL                       | 8.85729      | 76.9362       | 23.1632     | 1        |
| 356 | HMGB2         | HMGB2         | 0.000578932        | 0.000350755                  | 0.482059                         | -2.07443                          | NC+MYCN down vs NC-CTRL                       | 18.5822      | 7894.44       | 1132.9      | 1        |
| 357 | SNN           | SNN           | 0.000991227        | 0.00053501                   | 0.482229                         | -2.0737                           | NC+MYCN down vs NC-CTRL                       | 15.871       | 433.596       | 72.8536     | 1        |
| 358 | PPCDC         | PPCDC         | 0.000820951        | 0.000152332                  | 0.482819                         | -2.07117                          | NC+MYCN down vs NC-CTRL                       | 16.7801      | 1.08785       | 0.17288     | 1        |
| 359 | DNAJB4        | DNAJB4        | 0.000264319        | 0.000497918                  | 0.483557                         | -2.06801                          | NC+MYCN down vs NC-CTRL                       | 23.2479      | 181.902       | 20.8652     | 1        |
| 360 | HMG2          | HMG2          | 0.00386555         | 0.00291789                   | 0.483817                         | -2.0669                           | NC+MYCN down vs NC-CTRL                       | 10.4333      | 15574.1       | 3980.61     | 1        |
| 361 | SPSB2         | SPSB2         | 0.0221332          | 0.010108                     | 0.483846                         | -2.06677                          | NC+MYCN down vs NC-CTRL                       | 5.67762      | 3.41689       | 1.60485     | 1        |
| 362 | AC079807.2    | AC079807.2    | 0.00135602         | 0.00122655                   | 0.484747                         | -2.06293                          | NC+MYCN down vs NC-CTRL                       | 14.4508      | 1.51502       | 0.279573    | 1        |
| 363 | KIFC1         | KIFC1         | 0.0018226          | 0.000432435                  | 0.485172                         | -2.06112                          | NC+MYCN down vs NC-CTRL                       | 13.2087      | 1105.54       | 223.195     | 1        |
| 364 | RIPK1         | RIPK1         | 0.000256109        | 0.00231253                   | 0.48589                          | -2.05808                          | NC+MYCN down vs NC-CTRL                       | 23.4554      | 42.4534       | 4.82657     | 1        |
| 365 | RWDD3         | RWDD3         | 6.20E-05           | 1.41E-05                     | 0.486011                         | -2.05757                          | NC+MYCN down vs NC-CTRL                       | 34.6921      | 31.2885       | 2.40505     | 1        |
| 366 | AC004158.2    | AC004158.2    | 0.00803836         | 0.00705512                   | 0.486373                         | -2.05603                          | NC+MYCN down vs NC-CTRL                       | 8.18602      | 2.97395       | 0.968791    | 1        |
| 367 | TYMS          | TYMS          | 0.00463523         | 0.000647052                  | 0.487072                         | -2.05308                          | NC+MYCN down vs NC-CTRL                       | 9.83728      | 1790.19       | 485.281     | 1        |
| 368 | ZNF548        | ZNF548        | 3.51E-05           | 0.000126184                  | 0.487291                         | -2.05216                          | NC+MYCN down vs NC-CTRL                       | 40.4655      | 10.1742       | 0.670479    | 1        |
| 369 | PCDHB15       | PCDHB15       | 0.000193157        | 0.000410114                  | 0.487418                         | -2.05163                          | NC+MYCN down vs NC-CTRL                       | 25.3857      | 12.772        | 1.34165     | 1        |
| 370 | RSPH9         | RSPH9         | 0.000738514        | 0.00016209                   | 0.487432                         | -2.05157                          | NC+MYCN down vs NC-CTRL                       | 17.3096      | 0.122358      | 0.0188501   | 1        |
| 371 | SAMD15        | SAMD15        | 0.00552503         | 0.0117538                    | 0.488002                         | -2.04917                          | NC+MYCN down vs NC-CTRL                       | 9.2859       | 1.72124       | 0.494295    | 1        |
| 372 | FZR1          | FZR1          | 0.0122105          | 0.00307551                   | 0.488256                         | -2.04811                          | NC+MYCN down vs NC-CTRL                       | 7.07421      | 62.8771       | 23.7019     | 1        |
| 373 | PHYHD1        | PHYHD1        | 9.34E-06           | 0.000134955                  | 0.4887                           | -2.04625                          | NC+MYCN down vs NC-CTRL                       | 57.4712      | 7.1914        | 0.333681    | 1        |
| 374 | RP11-611E13.2 | RP11-611E13.2 | 0.00376446         | 0.000841165                  | 0.488951                         | -2.0452                           | NC+MYCN down vs NC-CTRL                       | 10.5226      | 2.03075       | 0.514641    | 1        |
| 375 | RP11-327J17.1 | RP11-327J17.1 | 0.000241816        | 0.00227724                   | 0.489179                         | -2.04424                          | NC+MYCN down vs NC-CTRL                       | 23.8374      | 3.87764       | 0.433787    | 1        |
| 376 | CDCA2         | CDCA2         | 9.65E-05           | 2.26E-05                     | 0.48942                          | -2.04324                          | NC+MYCN down vs NC-CTRL                       | 30.7586      | 111.058       | 9.62838     | 1        |
| 377 | CTD-2574D22.2 | CTD-2574D22.2 | 0.000619088        | 0.000243769                  | 0.489614                         | -2.04243                          | NC+MYCN down vs NC-CTRL                       | 18.2239      | 1.57817       | 0.23093     | 1        |
| 378 | RP11-188D8.1  | RP11-188D8.1  | 0.00222585         | 0.00557776                   | 0.48968                          | -2.04215                          | NC+MYCN down vs NC-CTRL                       | 12.4195      | 2.87931       | 0.618236    | 1        |
| 379 | MAGED2        | MAGED2        | 4.17E-07           | 2.26E-06                     | 0.489733                         | -2.04193                          | NC+MYCN down vs NC-CTRL                       | 128.467      | 17092.6       | 354.802     | 1        |
| 380 | RP11-337C18.8 | RP11-337C18.8 | 0.000895256        | 0.00671013                   | 0.489971                         | -2.04094                          | NC+MYCN down vs NC-CTRL                       | 16.3569      | 0.502854      | 0.0819805   | 1        |
| 381 | KIF20A        | KIF20A        | 0.000216848        | 7.33E-05                     | 0.490194                         | -2.04001                          | NC+MYCN down vs NC-CTRL                       | 24.5775      | 1446.22       | 156.915     | 1        |
| 382 | PLAUR         | PLAUR         | 0.00104102         | 0.000199348                  | 0.490561                         | -2.03848                          | NC+MYCN down vs NC-CTRL                       | 15.6414      | 9.89473       | 1.68693     | 1        |
| 383 | FTLP3         | FTLP3         | 0.00408628         | 0.00309355                   | 0.490957                         | -2.03684                          | NC+MYCN down vs NC-CTRL                       | 10.2482      | 4685          | 1219.08     | 1        |
| 384 | RBCK1         | RBCK1         | 0.0146674          | 0.00442694                   | 0.491211                         | -2.03579                          | NC+MYCN down vs NC-CTRL                       | 6.62173      | 88.5301       | 35.6523     | 1        |
| 385 | ZNF564        | ZNF564        | 0.0161068          | 0.00355115                   | 0.49135                          | -2.03521                          | NC+MYCN down vs NC-CTRL                       | 6.39845      | 2.32061       | 0.967157    | 1        |
| 386 | RP3-486I3.7   | RP3-486I3.7   | 0.0140471          | 0.00641118                   | 0.491615                         | -2.03411                          | NC+MYCN down vs NC-CTRL                       | 6.72654      | 0.161773      | 0.064133    | 1        |
| 387 | FSTL1         | FSTL1         | 0.0023192          | 0.00445461                   | 0.49214                          | -2.03194                          | NC+MYCN down vs NC-CTRL                       | 12.2621      | 2186.58       | 475.521     | 1        |

|     | Probeset ID    | Gene Symbol    | p-value(Attribute) | p-value(NC+MYCN vs. NC-CTRL) | MeanRatio(NC+MYCN N vs. NC-CTRL) | FoldChange(NC+MYCN N vs. NC-CTRL) | FoldChange(NC+MYCN vs. NC-CTRL) (Description) | F(Attribute) | SS(Attribute) | SS(Error)  | F(Error) |
|-----|----------------|----------------|--------------------|------------------------------|----------------------------------|-----------------------------------|-----------------------------------------------|--------------|---------------|------------|----------|
| 388 | SALL2          | SALL2          | 0.000149397        | 3.39E-05                     | 0.492292                         | -2.03132                          | NC+MYCN down vs NC-CTRL                       | 27.2657      | 147.177       | 14.3943    | 1        |
| 389 | LRP1           | LRP1           | 0.0185905          | 0.00968447                   | 0.492323                         | -2.03119                          | NC+MYCN down vs NC-CTRL                       | 6.06623      | 147.635       | 64.8991    | 1        |
| 390 | ARHGAP5        | ARHGAP5        | 1.65E-05           | 3.37E-05                     | 0.492464                         | -2.0306                           | NC+MYCN down vs NC-CTRL                       | 49.4757      | 895.017       | 48.2401    | 1        |
| 391 | CMC4           | CMC4           | 0.0097105          | 0.00589436                   | 0.492578                         | -2.03014                          | NC+MYCN down vs NC-CTRL                       | 7.66918      | 6.84631       | 2.38054    | 1        |
| 392 | RP4-694A7.2    | RP4-694A7.2    | 0.0178684          | 0.00653275                   | 0.492614                         | -2.02999                          | NC+MYCN down vs NC-CTRL                       | 6.15684      | 5.07231       | 2.19693    | 1        |
| 393 | ZKSCAN3        | ZKSCAN3        | 0.00177819         | 0.000380738                  | 0.492962                         | -2.02856                          | NC+MYCN down vs NC-CTRL                       | 13.3089      | 4.0932        | 0.820147   | 1        |
| 394 | UBAC2-AS1      | UBAC2-AS1      | 0.0232794          | 0.00938224                   | 0.493498                         | -2.02635                          | NC+MYCN down vs NC-CTRL                       | 5.56821      | 0.44146       | 0.211419   | 1        |
| 395 | ZNF223         | ZNF223         | 6.78E-05           | 2.29E-05                     | 0.493936                         | -2.02455                          | NC+MYCN down vs NC-CTRL                       | 33.8618      | 1.37644       | 0.108397   | 1        |
| 396 | FRMD6          | FRMD6          | 0.0070936          | 0.00382505                   | 0.494167                         | -2.02361                          | NC+MYCN down vs NC-CTRL                       | 8.5415       | 47.3139       | 14.7715    | 1        |
| 397 | RP1-279N11.1   | RP1-279N11.1   | 0.000960241        | 0.00800282                   | 0.494208                         | -2.02344                          | NC+MYCN down vs NC-CTRL                       | 16.0212      | 2.90687       | 0.483838   | 1        |
| 398 | TMSB15A        | TMSB15A        | 0.0236428          | 0.0103839                    | 0.496057                         | -2.0159                           | NC+MYCN down vs NC-CTRL                       | 5.53491      | 3638.81       | 1753.14    | 1        |
| 399 | ZNF225         | ZNF225         | 0.0128377          | 0.00394357                   | 0.498008                         | -2.008                            | NC+MYCN down vs NC-CTRL                       | 6.94854      | 1.03986       | 0.399072   | 1        |
| 400 | NEK10          | NEK10          | 0.00440581         | 0.00367948                   | 0.49867                          | -2.00534                          | NC+MYCN down vs NC-CTRL                       | 10.0012      | 0.00535767    | 0.00142854 | 1        |
| 401 | SUOX           | SUOX           | 0.00157058         | 0.00143114                   | 0.498683                         | -2.00528                          | NC+MYCN down vs NC-CTRL                       | 13.8224      | 3.2798        | 6.32752    | 1        |
| 402 | ZNF738         | ZNF738         | 0.0120059          | 0.00549647                   | 0.499139                         | -2.00345                          | NC+MYCN down vs NC-CTRL                       | 7.11696      | 113.964       | 42.7013    | 1        |
| 403 | NUTM2D         | NUTM2D         | 0.0177904          | 0.0077556                    | 0.499141                         | -2.00344                          | NC+MYCN down vs NC-CTRL                       | 6.16689      | 4.78414       | 2.06874    | 1        |
| 404 | GINS4          | GINS4          | 0.000348089        | 9.63E-05                     | 0.49917                          | -2.00332                          | NC+MYCN down vs NC-CTRL                       | 21.5046      | 37.8817       | 4.6975     | 1        |
| 405 | RP11-350D17.3  | RP11-350D17.3  | 0.000572077        | 0.00573996                   | 0.500515                         | -1.99794                          | NC+MYCN down vs NC-CTRL                       | 18.6465      | 12.2926       | 1.75799    | 1        |
| 406 | FAM214B        | FAM214B        | 0.0182141          | 0.0102145                    | 0.500654                         | -1.99739                          | NC+MYCN down vs NC-CTRL                       | 6.1129       | 5.98324       | 2.6101     | 1        |
| 407 | AC026740.1     | AC026740.1     | 0.00277533         | 0.00702884                   | 0.500657                         | -1.99738                          | NC+MYCN down vs NC-CTRL                       | 11.5927      | 5.4987        | 1.26486    | 1        |
| 408 | GBAP1          | GBAP1          | 1.60E-05           | 2.74E-06                     | 0.500723                         | -1.99711                          | NC+MYCN down vs NC-CTRL                       | 49.8652      | 27.9801       | 1.49631    | 1        |
| 409 | TGFBR2         | TGFBR2         | 1.34E-05           | 5.14E-05                     | 0.501936                         | -1.99229                          | NC+MYCN down vs NC-CTRL                       | 52.2156      | 44.2564       | 2.26019    | 1        |
| 410 | LATS2          | LATS2          | 0.000146162        | 0.00116966                   | 0.502828                         | -1.98875                          | NC+MYCN down vs NC-CTRL                       | 27.4316      | 30.4869       | 2.96368    | 1        |
| 411 | DZIP1L         | DZIP1L         | 0.000119641        | 0.000135095                  | 0.502912                         | -1.98842                          | NC+MYCN down vs NC-CTRL                       | 28.9913      | 12.1728       | 1.11968    | 1        |
| 412 | SKA1           | SKA1           | 0.000252708        | 5.79E-05                     | 0.503584                         | -1.98577                          | NC+MYCN down vs NC-CTRL                       | 23.5439      | 48.7547       | 5.52213    | 1        |
| 413 | CKAP2L         | CKAP2L         | 4.14E-06           | 4.83E-07                     | 0.504368                         | -1.98268                          | NC+MYCN down vs NC-CTRL                       | 71.107       | 94.7423       | 3.55304    | 1        |
| 414 | AC092171.2     | AC092171.2     | 0.00572257         | 0.011663                     | 0.504476                         | -1.98225                          | NC+MYCN down vs NC-CTRL                       | 9.17845      | 1.51377       | 0.439804   | 1        |
| 415 | NID2           | NID2           | 1.27E-05           | 0.00015802                   | 0.505577                         | -1.97794                          | NC+MYCN down vs NC-CTRL                       | 52.9783      | 1150.63       | 57.9171    | 1        |
| 416 | ADCY6          | ADCY6          | 0.000741824        | 0.000583886                  | 0.50583                          | -1.97695                          | NC+MYCN down vs NC-CTRL                       | 17.287       | 192.717       | 29.7283    | 1        |
| 417 | CENPI          | CENPI          | 5.67E-06           | 2.30E-06                     | 0.506084                         | -1.97596                          | NC+MYCN down vs NC-CTRL                       | 65.4984      | 55.8503       | 2.27386    | 1        |
| 418 | ZNF821         | ZNF821         | 0.00984272         | 0.00529284                   | 0.506739                         | -1.9734                           | NC+MYCN down vs NC-CTRL                       | 7.63312      | 16.1475       | 5.64121    | 1        |
| 419 | C17orf49       | C17orf49       | 0.0002741          | 0.00088304                   | 0.506843                         | -1.973                            | NC+MYCN down vs NC-CTRL                       | 23.0109      | 385.082       | 44.626     | 1        |
| 420 | CDC20          | CDC20          | 0.00723269         | 0.00497946                   | 0.507822                         | -1.9692                           | NC+MYCN down vs NC-CTRL                       | 8.48557      | 3116.49       | 979.385    | 1        |
| 421 | WBP5           | WBP5           | 3.79E-05           | 0.000229672                  | 0.508263                         | -1.96748                          | NC+MYCN down vs NC-CTRL                       | 39.638       | 13096.2       | 881.055    | 1        |
| 422 | LINC00648      | LINC00648      | 3.61E-06           | 7.32E-05                     | 0.50827                          | -1.96746                          | NC+MYCN down vs NC-CTRL                       | 73.664       | 74.7967       | 2.70767    | 1        |
| 423 | ADD1           | ADD1           | 0.00312603         | 0.000455498                  | 0.508988                         | -1.96468                          | NC+MYCN down vs NC-CTRL                       | 11.1653      | 142.792       | 34.1038    | 1        |
| 424 | C18orf54       | C18orf54       | 8.44E-06           | 8.74E-06                     | 0.509138                         | -1.9641                           | NC+MYCN down vs NC-CTRL                       | 59.0207      | 86.0925       | 3.88982    | 1        |
| 425 | CC2D1B         | CC2D1B         | 0.000176872        | 2.45E-05                     | 0.509249                         | -1.96367                          | NC+MYCN down vs NC-CTRL                       | 26.0167      | 10.3103       | 1.05679    | 1        |
| 426 | DSTNP1         | DSTNP1         | 0.0133118          | 0.00333205                   | 0.509812                         | -1.96151                          | NC+MYCN down vs NC-CTRL                       | 6.85852      | 34.3592       | 13.3592    | 1        |
| 427 | RP11-288H12.3  | RP11-288H12.3  | 7.76E-05           | 0.000149136                  | 0.509846                         | -1.96138                          | NC+MYCN down vs NC-CTRL                       | 32.645       | 5.97602       | 0.488162   | 1        |
| 428 | RAB11B-AS1     | RAB11B-AS1     | 0.0114903          | 0.0035176                    | 0.510008                         | -1.96075                          | NC+MYCN down vs NC-CTRL                       | 7.22883      | 1.59725       | 0.589213   | 1        |
| 429 | RP11-351I21.11 | RP11-351I21.11 | 0.00862072         | 0.00503678                   | 0.510209                         | -1.95998                          | NC+MYCN down vs NC-CTRL                       | 7.99191      | 1.89827       | 0.633398   | 1        |
| 430 | FOXM1          | FOXM1          | 0.000227917        | 0.000572119                  | 0.510433                         | -1.95912                          | NC+MYCN down vs NC-CTRL                       | 24.237       | 1395.79       | 153.572    | 1        |

|     | Probeset ID | Gene Symbol | p-value(Attribute) | p-value(NC+MYCN vs. NC-CTRL) | MeanRatio(NC+MYCN N vs. NC-CTRL) | FoldChange(NC+MYCN N vs. NC-CTRL) | FoldChange(NC+MYCN vs. NC-CTRL) (Description) | F(Attribute) | SS(Attribute) | SS(Error) | F(Error) |
|-----|-------------|-------------|--------------------|------------------------------|----------------------------------|-----------------------------------|-----------------------------------------------|--------------|---------------|-----------|----------|
| 431 | GNRH1       | GNRH1       | 0.00479576         | 0.00265125                   | 0.510943                         | -1.95717                          | NC+MYCN down vs NC-CTRL                       | 9.72849      | 7.32121       | 2.00681   | 1        |
| 432 | IER5L       | IER5L       | 0.00501097         | 0.00648849                   | 0.51119                          | -1.95622                          | NC+MYCN down vs NC-CTRL                       | 9.58957      | 70.6842       | 19.6558   | 1        |
| 433 | MVD         | MVD         | 0.000218956        | 0.00161046                   | 0.511772                         | -1.954                            | NC+MYCN down vs NC-CTRL                       | 24.511       | 858.489       | 93.3989   | 1        |
| 434 | THAP8       | THAP8       | 0.000303482        | 6.94E-05                     | 0.511912                         | -1.95346                          | NC+MYCN down vs NC-CTRL                       | 22.358       | 8.12073       | 0.968568  | 1        |
| 435 | ZNF304      | ZNF304      | 0.000301318        | 0.000133113                  | 0.512343                         | -1.95182                          | NC+MYCN down vs NC-CTRL                       | 22.4034      | 7.11405       | 0.846784  | 1        |
| 436 | ZNF101      | ZNF101      | 0.0130591          | 0.00249511                   | 0.512658                         | -1.95062                          | NC+MYCN down vs NC-CTRL                       | 6.906        | 1.23586       | 0.477213  | 1        |
| 437 | ZNF160      | ZNF160      | 0.000517413        | 0.00106898                   | 0.512663                         | -1.9506                           | NC+MYCN down vs NC-CTRL                       | 19.1961      | 12.6964       | 1.76375   | 1        |
| 438 | NFKBIZ      | NFKBIZ      | 0.00750385         | 0.00913573                   | 0.512847                         | -1.9499                           | NC+MYCN down vs NC-CTRL                       | 8.38029      | 1.81801       | 0.578504  | 1        |
| 439 | KIF4A       | KIF4A       | 0.00295768         | 0.0011716                    | 0.514047                         | -1.94535                          | NC+MYCN down vs NC-CTRL                       | 11.3626      | 300.103       | 70.4309   | 1        |
| 440 | TMEM8A      | TMEM8A      | 0.0220709          | 0.00630218                   | 0.514205                         | -1.94475                          | NC+MYCN down vs NC-CTRL                       | 5.68377      | 27.5649       | 12.9327   | 1        |
| 441 | ZNF846      | ZNF846      | 0.000285064        | 0.000351871                  | 0.515085                         | -1.94143                          | NC+MYCN down vs NC-CTRL                       | 22.7574      | 3.6605        | 0.42893   | 1        |
| 442 | RHOC        | RHOC        | 0.00592202         | 0.00487653                   | 0.515225                         | -1.9409                           | NC+MYCN down vs NC-CTRL                       | 9.07456      | 267.966       | 78.7449   | 1        |
| 443 | AL358813.2  | AL358813.2  | 0.00246112         | 0.0113398                    | 0.515576                         | -1.93958                          | NC+MYCN down vs NC-CTRL                       | 12.0373      | 3.19522       | 0.707849  | 1        |
| 444 | ZNF606      | ZNF606      | 0.00260289         | 0.000585165                  | 0.516047                         | -1.93781                          | NC+MYCN down vs NC-CTRL                       | 11.8284      | 5.40207       | 1.21788   | 1        |
| 445 | CCNF        | CCNF        | 0.00215443         | 0.000324856                  | 0.516102                         | -1.9376                           | NC+MYCN down vs NC-CTRL                       | 12.5456      | 59.1782       | 12.5788   | 1        |
| 446 | TNKS2-AS1   | TNKS2-AS1   | 0.00349715         | 0.00917239                   | 0.516961                         | -1.93438                          | NC+MYCN down vs NC-CTRL                       | 10.7738      | 0.642025      | 0.158911  | 1        |
| 447 | C8orf58     | C8orf58     | 0.0222474          | 0.00724244                   | 0.517564                         | -1.93213                          | NC+MYCN down vs NC-CTRL                       | 5.66641      | 8.27749       | 3.89547   | 1        |
| 448 | C22orf46    | C22orf46    | 0.00748455         | 0.00203559                   | 0.517746                         | -1.93145                          | NC+MYCN down vs NC-CTRL                       | 8.38762      | 14.0533       | 4.46793   | 1        |
| 449 | OAF         | OAF         | 0.00283397         | 0.0109549                    | 0.517954                         | -1.93067                          | NC+MYCN down vs NC-CTRL                       | 11.5167      | 729.414       | 168.894   | 1        |
| 450 | CMYA5       | CMYA5       | 0.00434752         | 0.0115588                    | 0.518696                         | -1.92791                          | NC+MYCN down vs NC-CTRL                       | 10.0446      | 0.0676172     | 0.0179513 | 1        |
| 451 | WBP1L       | WBP1L       | 0.000945265        | 0.00112398                   | 0.519197                         | -1.92605                          | NC+MYCN down vs NC-CTRL                       | 16.096       | 39.0434       | 6.46843   | 1        |
| 452 | ILK         | ILK         | 0.000268346        | 0.000395205                  | 0.52027                          | -1.92208                          | NC+MYCN down vs NC-CTRL                       | 23.149       | 523.273       | 60.2789   | 1        |
| 453 | KIF2C       | KIF2C       | 0.00307819         | 0.00122043                   | 0.520279                         | -1.92205                          | NC+MYCN down vs NC-CTRL                       | 11.22        | 970.534       | 230.668   | 1        |
| 454 | UTRN        | UTRN        | 4.06E-07           | 9.08E-06                     | 0.520323                         | -1.92188                          | NC+MYCN down vs NC-CTRL                       | 129.415      | 334.383       | 6.89014   | 1        |
| 455 | MESDC1      | MESDC1      | 6.73E-06           | 3.94E-06                     | 0.52073                          | -1.92038                          | NC+MYCN down vs NC-CTRL                       | 62.6462      | 446.023       | 18.9859   | 1        |
| 456 | GALNT10     | GALNT10     | 0.00153555         | 0.00208192                   | 0.520777                         | -1.92021                          | NC+MYCN down vs NC-CTRL                       | 13.9174      | 8.2264        | 1.57623   | 1        |
| 457 | RGPD6       | RGPD6       | 0.00225127         | 0.0013477                    | 0.521529                         | -1.91744                          | NC+MYCN down vs NC-CTRL                       | 12.3758      | 29.5425       | 6.36565   | 1        |
| 458 | UBE2C       | UBE2C       | 0.000972           | 0.000158614                  | 0.521574                         | -1.91727                          | NC+MYCN down vs NC-CTRL                       | 15.9635      | 2201.14       | 367.696   | 1        |
| 459 | FLNA        | FLNA        | 0.00710476         | 0.00396156                   | 0.522474                         | -1.91397                          | NC+MYCN down vs NC-CTRL                       | 8.53697      | 4060.06       | 1268.23   | 1        |
| 460 | LINC00115   | LINC00115   | 0.00765379         | 0.00935472                   | 0.522609                         | -1.91348                          | NC+MYCN down vs NC-CTRL                       | 8.32409      | 1.70416       | 0.545938  | 1        |
| 461 | RP1-257A7.4 | RP1-257A7.4 | 0.00899142         | 0.00199891                   | 0.52356                          | -1.91                             | NC+MYCN down vs NC-CTRL                       | 7.87668      | 0.613718      | 0.207775  | 1        |
| 462 | NPHP3       | NPHP3       | 0.00265479         | 0.00155898                   | 0.523741                         | -1.90934                          | NC+MYCN down vs NC-CTRL                       | 11.7555      | 17.6361       | 4.00066   | 1        |
| 463 | LMNB1       | LMNB1       | 4.01E-05           | 2.55E-05                     | 0.524182                         | -1.90774                          | NC+MYCN down vs NC-CTRL                       | 39.0328      | 3865.64       | 264.096   | 1        |
| 464 | ZNF14       | ZNF14       | 0.000429451        | 0.000122782                  | 0.524227                         | -1.90757                          | NC+MYCN down vs NC-CTRL                       | 20.2529      | 3.42113       | 0.450455  | 1        |
| 465 | PSRC1       | PSRC1       | 0.00305176         | 0.00309272                   | 0.524298                         | -1.90731                          | NC+MYCN down vs NC-CTRL                       | 11.2506      | 623.589       | 147.805   | 1        |
| 466 | C9orf169    | C9orf169    | 0.00250012         | 0.00501097                   | 0.524542                         | -1.90642                          | NC+MYCN down vs NC-CTRL                       | 11.9784      | 2.06405       | 0.459506  | 1        |
| 467 | RP3-368A4.6 | RP3-368A4.6 | 0.013768           | 0.0042873                    | 0.52455                          | -1.90639                          | NC+MYCN down vs NC-CTRL                       | 6.77561      | 32.7866       | 12.9038   | 1        |
| 468 | PLEKHO1     | PLEKHO1     | 6.33E-05           | 3.09E-05                     | 0.524657                         | -1.90601                          | NC+MYCN down vs NC-CTRL                       | 34.4983      | 59.4626       | 4.59637   | 1        |
| 469 | SASH1       | SASH1       | 0.00129412         | 0.0108073                    | 0.524848                         | -1.90531                          | NC+MYCN down vs NC-CTRL                       | 14.6556      | 568.536       | 103.448   | 1        |
| 470 | ARHGAP1     | ARHGAP1     | 1.62E-05           | 0.000957882                  | 0.524939                         | -1.90498                          | NC+MYCN down vs NC-CTRL                       | 49.7364      | 65.8225       | 3.52914   | 1        |
| 471 | FAM109A     | FAM109A     | 0.0151986          | 0.0119125                    | 0.525315                         | -1.90362                          | NC+MYCN down vs NC-CTRL                       | 6.53628      | 17.9112       | 7.30739   | 1        |
| 472 | AC092295.7  | AC092295.7  | 0.0109083          | 0.00182163                   | 0.525579                         | -1.90266                          | NC+MYCN down vs NC-CTRL                       | 7.36289      | 0.729341      | 0.26415   | 1        |
| 473 | ZNF517      | ZNF517      | 0.0160069          | 0.00400424                   | 0.525945                         | -1.90134                          | NC+MYCN down vs NC-CTRL                       | 6.41313      | 3.04071       | 1.26437   | 1        |

|     | Probeset ID   | Gene Symbol   | p-value(Attribute) | p-value(NC+MYCN vs. NC-CTRL) | MeanRatio(NC+MYCN N vs. NC-CTRL) | FoldChange(NC+MYCN N vs. NC-CTRL) | FoldChange(NC+MYCN vs. NC-CTRL) (Description) | F(Attribute) | SS(Attribute) | SS(Error)  | F(Error) |
|-----|---------------|---------------|--------------------|------------------------------|----------------------------------|-----------------------------------|-----------------------------------------------|--------------|---------------|------------|----------|
| 474 | LRRC66        | LRRC66        | 0.00213764         | 0.00627864                   | 0.526982                         | -1.8976                           | NC+MYCN down vs NC-CTRL                       | 12.576       | 0.293101      | 0.0621503  | 1        |
| 475 | SPC24         | SPC24         | 0.000207812        | 0.000979183                  | 0.527274                         | -1.89655                          | NC+MYCN down vs NC-CTRL                       | 24.8721      | 38.4547       | 4.12292    | 1        |
| 476 | SALL4         | SALL4         | 0.00396926         | 0.00939567                   | 0.527473                         | -1.89583                          | NC+MYCN down vs NC-CTRL                       | 10.3447      | 159.407       | 41.0919    | 1        |
| 477 | TPM4          | TPM4          | 0.00108425         | 0.000466036                  | 0.527682                         | -1.89508                          | NC+MYCN down vs NC-CTRL                       | 15.453       | 4460.22       | 769.683    | 1        |
| 478 | ZNF428        | ZNF428        | 0.000205144        | 0.00019765                   | 0.528692                         | -1.89146                          | NC+MYCN down vs NC-CTRL                       | 24.9622      | 1023.77       | 109.367    | 1        |
| 479 | ZNF112        | ZNF112        | 3.16E-05           | 4.27E-06                     | 0.528724                         | -1.89135                          | NC+MYCN down vs NC-CTRL                       | 41.5894      | 7.40119       | 0.474556   | 1        |
| 480 | ZNF776        | ZNF776        | 0.00123165         | 0.000160259                  | 0.529139                         | -1.88986                          | NC+MYCN down vs NC-CTRL                       | 14.8751      | 13.505        | 2.42105    | 1        |
| 481 | LINC01004     | LINC01004     | 0.00178205         | 0.00246972                   | 0.529243                         | -1.88949                          | NC+MYCN down vs NC-CTRL                       | 13.3         | 4.31904       | 0.865971   | 1        |
| 482 | CLUHP3        | CLUHP3        | 0.0106455          | 0.00648215                   | 0.529505                         | -1.88856                          | NC+MYCN down vs NC-CTRL                       | 7.42637      | 1.79825       | 0.645718   | 1        |
| 483 | CTC-273B12.8  | CTC-273B12.8  | 0.00603739         | 0.00792295                   | 0.529754                         | -1.88767                          | NC+MYCN down vs NC-CTRL                       | 9.01644      | 145.96        | 43.1685    | 1        |
| 484 | ZNF274        | ZNF274        | 0.00142505         | 0.000499943                  | 0.529959                         | -1.88694                          | NC+MYCN down vs NC-CTRL                       | 14.2358      | 5.76839       | 1.08054    | 1        |
| 485 | CETN2         | CETN2         | 0.000312501        | 0.00036068                   | 0.53026                          | -1.88587                          | NC+MYCN down vs NC-CTRL                       | 22.1733      | 846.662       | 101.824    | 1        |
| 486 | HOMER3        | HOMER3        | 0.000129959        | 0.000341704                  | 0.530298                         | -1.88573                          | NC+MYCN down vs NC-CTRL                       | 28.3375      | 183.807       | 17.297     | 1        |
| 487 | C21orf58      | C21orf58      | 0.0121113          | 0.00678272                   | 0.530772                         | -1.88405                          | NC+MYCN down vs NC-CTRL                       | 7.09483      | 115.153       | 43.2815    | 1        |
| 488 | RHNO1         | RHNO1         | 0.000677229        | 0.000149576                  | 0.531556                         | -1.88127                          | NC+MYCN down vs NC-CTRL                       | 17.7536      | 253.859       | 38.1306    | 1        |
| 489 | SMOX          | SMOX          | 5.63E-05           | 0.000312844                  | 0.531813                         | -1.88036                          | NC+MYCN down vs NC-CTRL                       | 35.6121      | 15.6061       | 1.1686     | 1        |
| 490 | GSPT2         | GSPT2         | 4.33E-05           | 3.09E-05                     | 0.532137                         | -1.87922                          | NC+MYCN down vs NC-CTRL                       | 38.2243      | 51.0664       | 3.56258    | 1        |
| 491 | NUDT16L1      | NUDT16L1      | 0.0142483          | 0.00298503                   | 0.534153                         | -1.87212                          | NC+MYCN down vs NC-CTRL                       | 6.69193      | 14.8294       | 5.90938    | 1        |
| 492 | ANKRD23       | ANKRD23       | 0.00163991         | 0.00254864                   | 0.534482                         | -1.87097                          | NC+MYCN down vs NC-CTRL                       | 13.6419      | 1.89125       | 0.369695   | 1        |
| 493 | CLK1          | CLK1          | 0.000255349        | 6.26E-05                     | 0.53453                          | -1.8708                           | NC+MYCN down vs NC-CTRL                       | 23.4751      | 113.849       | 12.9328    | 1        |
| 494 | ZNF432        | ZNF432        | 0.00307701         | 0.000452673                  | 0.535                            | -1.86916                          | NC+MYCN down vs NC-CTRL                       | 11.2213      | 4.41134       | 1.04832    | 1        |
| 495 | RASSF8        | RASSF8        | 0.00128069         | 0.00120324                   | 0.535195                         | -1.86848                          | NC+MYCN down vs NC-CTRL                       | 14.7016      | 38.2823       | 6.94386    | 1        |
| 496 | RP11-705O1.8  | RP11-705O1.8  | 0.00269044         | 0.00490209                   | 0.536272                         | -1.86473                          | NC+MYCN down vs NC-CTRL                       | 11.7064      | 0.184892      | 0.0421176  | 1        |
| 497 | C1QTNF6       | C1QTNF6       | 0.00362204         | 0.00538272                   | 0.536427                         | -1.86419                          | NC+MYCN down vs NC-CTRL                       | 10.6535      | 15.7384       | 3.93947    | 1        |
| 498 | SMO           | SMO           | 0.0124145          | 0.0114645                    | 0.536847                         | -1.86273                          | NC+MYCN down vs NC-CTRL                       | 7.03248      | 333.109       | 126.313    | 1        |
| 499 | RP1-130H16.16 | RP1-130H16.16 | 0.00957396         | 0.0100142                    | 0.536905                         | -1.86253                          | NC+MYCN down vs NC-CTRL                       | 7.70708      | 0.850673      | 0.294335   | 1        |
| 500 | ZNF264        | ZNF264        | 0.000789983        | 0.000298521                  | 0.538336                         | -1.85757                          | NC+MYCN down vs NC-CTRL                       | 16.9709      | 3.50178       | 0.550239   | 1        |
| 501 | CUL7          | CUL7          | 0.00106396         | 0.000883298                  | 0.539067                         | -1.85506                          | NC+MYCN down vs NC-CTRL                       | 15.5403      | 137.326       | 23.5648    | 1        |
| 502 | AMACR         | AMACR         | 0.00272691         | 0.00144746                   | 0.539087                         | -1.85499                          | NC+MYCN down vs NC-CTRL                       | 11.657       | 3.72196       | 0.851438   | 1        |
| 503 | USP51         | USP51         | 3.31E-08           | 4.91E-07                     | 0.539089                         | -1.85498                          | NC+MYCN down vs NC-CTRL                       | 244.664      | 25.9406       | 0.282735   | 1        |
| 504 | RASSF8-AS1    | RASSF8-AS1    | 0.00833764         | 0.0068156                    | 0.539498                         | -1.85358                          | NC+MYCN down vs NC-CTRL                       | 8.08415      | 8.03802       | 2.65145    | 1        |
| 505 | HJURP         | HJURP         | 0.00128717         | 0.000204305                  | 0.539985                         | -1.8519                           | NC+MYCN down vs NC-CTRL                       | 14.6793      | 214.031       | 38.8812    | 1        |
| 506 | PCDHA4        | PCDHA4        | 0.000752868        | 0.00133899                   | 0.539999                         | -1.85186                          | NC+MYCN down vs NC-CTRL                       | 17.2123      | 2.52505       | 0.391201   | 1        |
| 507 | SDC3          | SDC3          | 6.81E-05           | 0.000169262                  | 0.540037                         | -1.85173                          | NC+MYCN down vs NC-CTRL                       | 33.8266      | 381.374       | 30.065     | 1        |
| 508 | FTH1          | FTH1          | 0.0181404          | 0.00505054                   | 0.540125                         | -1.85142                          | NC+MYCN down vs NC-CTRL                       | 6.12218      | 37081.9       | 16152      | 1        |
| 509 | ASF1B         | ASF1B         | 0.000148568        | 5.13E-05                     | 0.540782                         | -1.84917                          | NC+MYCN down vs NC-CTRL                       | 27.3078      | 187.358       | 18.2959    | 1        |
| 510 | MARCKS        | MARCKS        | 0.0132374          | 0.0061843                    | 0.54101                          | -1.8484                           | NC+MYCN down vs NC-CTRL                       | 6.87239      | 12263.5       | 4758.55    | 1        |
| 511 | CSF2RA        | CSF2RA        | 7.96E-05           | 0.00181214                   | 0.541181                         | -1.84781                          | NC+MYCN down vs NC-CTRL                       | 32.4134      | 0.0359009     | 0.00295358 | 1        |
| 512 | RP11-126K1.6  | RP11-126K1.6  | 0.00828758         | 0.00533345                   | 0.541412                         | -1.84702                          | NC+MYCN down vs NC-CTRL                       | 8.10087      | 12.8626       | 4.23415    | 1        |
| 513 | ZNF699        | ZNF699        | 0.0113762          | 0.00980853                   | 0.541611                         | -1.84634                          | NC+MYCN down vs NC-CTRL                       | 7.25444      | 1.76242       | 0.647849   | 1        |
| 514 | CTD-2368P22.1 | CTD-2368P22.1 | 0.000379874        | 0.000828722                  | 0.541873                         | -1.84545                          | NC+MYCN down vs NC-CTRL                       | 20.9759      | 9.32769       | 1.18583    | 1        |
| 515 | COL5A2        | COL5A2        | 1.28E-06           | 4.30E-05                     | 0.542163                         | -1.84446                          | NC+MYCN down vs NC-CTRL                       | 96.3231      | 1795.68       | 49.7127    | 1        |
| 516 | ZNF624        | ZNF624        | 0.000241571        | 0.000245056                  | 0.543523                         | -1.83985                          | NC+MYCN down vs NC-CTRL                       | 23.8442      | 5.20109       | 0.581675   | 1        |

|     | Probeset ID   | Gene Symbol   | p-value(Attribute) | p-value(NC+MYCN vs. NC-CTRL) | MeanRatio(NC+MYCN N vs. NC-CTRL) | FoldChange(NC+MYCN N vs. NC-CTRL) | FoldChange(NC+MYCN vs. NC-CTRL) (Description) | F(Attribute) | SS(Attribute) | SS(Error) | F(Error) |
|-----|---------------|---------------|--------------------|------------------------------|----------------------------------|-----------------------------------|-----------------------------------------------|--------------|---------------|-----------|----------|
| 517 | C11orf68      | C11orf68      | 0.000677324        | 0.000317305                  | 0.543545                         | -1.83977                          | NC+MYCN down vs NC-CTRL                       | 17.7529      | 60.6724       | 9.11361   | 1        |
| 518 | ARF5          | ARF5          | 0.0137218          | 0.00312303                   | 0.543876                         | -1.83865                          | NC+MYCN down vs NC-CTRL                       | 6.78385      | 1012          | 397.808   | 1        |
| 519 | SNAI3-AS1     | SNAI3-AS1     | 2.30E-05           | 0.000294748                  | 0.543985                         | -1.83829                          | NC+MYCN down vs NC-CTRL                       | 45.2788      | 1.80683       | 0.106412  | 1        |
| 520 | TUBB4B        | TUBB4B        | 0.000484923        | 0.000195493                  | 0.544093                         | -1.83792                          | NC+MYCN down vs NC-CTRL                       | 19.5583      | 9784.5        | 1334.06   | 1        |
| 521 | LCP1          | LCP1          | 0.000489049        | 0.00557162                   | 0.545013                         | -1.83482                          | NC+MYCN down vs NC-CTRL                       | 19.5106      | 3.62416       | 0.495341  | 1        |
| 522 | PRMT2         | PRMT2         | 0.000126464        | 0.000109375                  | 0.545762                         | -1.8323                           | NC+MYCN down vs NC-CTRL                       | 28.5515      | 88.1752       | 8.23544   | 1        |
| 523 | ZNF549        | ZNF549        | 0.000309208        | 8.63E-05                     | 0.545947                         | -1.83168                          | NC+MYCN down vs NC-CTRL                       | 22.24        | 1.39845       | 0.167679  | 1        |
| 524 | ALDH16A1      | ALDH16A1      | 0.00726687         | 0.00186972                   | 0.545963                         | -1.83163                          | NC+MYCN down vs NC-CTRL                       | 8.47203      | 11.1025       | 3.49463   | 1        |
| 525 | FAM122C       | FAM122C       | 2.22E-06           | 1.72E-06                     | 0.54643                          | -1.83006                          | NC+MYCN down vs NC-CTRL                       | 83.5524      | 0.705016      | 0.0225014 | 1        |
| 526 | PLIN3         | PLIN3         | 0.00869611         | 0.01027                      | 0.546697                         | -1.82917                          | NC+MYCN down vs NC-CTRL                       | 7.96798      | 182.28        | 61.0041   | 1        |
| 527 | C5            | C5            | 0.00166613         | 0.00505984                   | 0.546721                         | -1.82909                          | NC+MYCN down vs NC-CTRL                       | 13.5761      | 7.21248       | 1.4167    | 1        |
| 528 | LYRM9         | LYRM9         | 0.000968749        | 0.00382846                   | 0.547186                         | -1.82753                          | NC+MYCN down vs NC-CTRL                       | 15.9793      | 0.777412      | 0.129736  | 1        |
| 529 | GDF11         | GDF11         | 9.11E-05           | 0.000298926                  | 0.54724                          | -1.82735                          | NC+MYCN down vs NC-CTRL                       | 31.2463      | 1089.3        | 92.9645   | 1        |
| 530 | UNC119        | UNC119        | 0.00105886         | 0.00145465                   | 0.54725                          | -1.82732                          | NC+MYCN down vs NC-CTRL                       | 15.5626      | 65.0939       | 11.1539   | 1        |
| 531 | RALB          | RALB          | 0.0047171          | 0.00380787                   | 0.547557                         | -1.82629                          | NC+MYCN down vs NC-CTRL                       | 9.78122      | 287.799       | 78.4631   | 1        |
| 532 | VN1R81P       | VN1R81P       | 0.0209149          | 0.004                        | 0.547776                         | -1.82557                          | NC+MYCN down vs NC-CTRL                       | 5.80194      | 64.0843       | 29.4542   | 1        |
| 533 | RP11-29813.1  | RP11-29813.1  | 0.00783207         | 0.00831172                   | 0.548868                         | -1.82193                          | NC+MYCN down vs NC-CTRL                       | 8.25903      | 0.829159      | 0.267718  | 1        |
| 534 | RGL2          | RGL2          | 0.00727909         | 0.00158144                   | 0.549806                         | -1.81882                          | NC+MYCN down vs NC-CTRL                       | 8.46721      | 37.8724       | 11.9275   | 1        |
| 535 | FKRP          | FKRP          | 0.0143402          | 0.00287873                   | 0.550131                         | -1.81775                          | NC+MYCN down vs NC-CTRL                       | 6.67631      | 6.52862       | 2.60768   | 1        |
| 536 | CDK2AP2       | CDK2AP2       | 0.00388839         | 0.00148385                   | 0.550821                         | -1.81547                          | NC+MYCN down vs NC-CTRL                       | 10.4135      | 38.4435       | 9.84449   | 1        |
| 537 | RP4-791C19.1  | RP4-791C19.1  | 0.0083009          | 0.00905028                   | 0.550988                         | -1.81492                          | NC+MYCN down vs NC-CTRL                       | 8.09641      | 0.0917845     | 0.0302305 | 1        |
| 538 | PKD2          | PKD2          | 7.08E-05           | 2.54E-05                     | 0.55102                          | -1.81481                          | NC+MYCN down vs NC-CTRL                       | 33.4643      | 123.824       | 9.86717   | 1        |
| 539 | RAB11B        | RAB11B        | 0.00260411         | 0.00228761                   | 0.551203                         | -1.81422                          | NC+MYCN down vs NC-CTRL                       | 11.8267      | 331.254       | 74.6907   | 1        |
| 540 | CENPW         | CENPW         | 0.00209305         | 0.0032545                    | 0.551694                         | -1.8126                           | NC+MYCN down vs NC-CTRL                       | 12.6582      | 364.627       | 76.8149   | 1        |
| 541 | FLRT3         | FLRT3         | 0.00175726         | 0.00941329                   | 0.551923                         | -1.81185                          | NC+MYCN down vs NC-CTRL                       | 13.3571      | 104.071       | 20.7771   | 1        |
| 542 | KRT8P12       | KRT8P12       | 0.00361737         | 0.000645097                  | 0.552202                         | -1.81093                          | NC+MYCN down vs NC-CTRL                       | 10.6579      | 2.27241       | 0.568569  | 1        |
| 543 | CDK1          | CDK1          | 1.89E-06           | 8.81E-07                     | 0.552268                         | -1.81071                          | NC+MYCN down vs NC-CTRL                       | 87.1213      | 531.482       | 16.2679   | 1        |
| 544 | PEA15         | PEA15         | 0.00102667         | 0.00266181                   | 0.552277                         | -1.81069                          | NC+MYCN down vs NC-CTRL                       | 15.7062      | 1653.09       | 280.67    | 1        |
| 545 | FBF1          | FBF1          | 0.00297952         | 0.00114357                   | 0.552597                         | -1.80964                          | NC+MYCN down vs NC-CTRL                       | 11.3362      | 5.38479       | 1.26669   | 1        |
| 546 | HNRNPA1P59    | HNRNPA1P59    | 0.0238155          | 0.00467405                   | 0.552813                         | -1.80893                          | NC+MYCN down vs NC-CTRL                       | 5.5193       | 0.59705       | 0.288466  | 1        |
| 547 | TACC3         | TACC3         | 0.00125837         | 0.000582417                  | 0.553249                         | -1.80751                          | NC+MYCN down vs NC-CTRL                       | 14.7795      | 564.899       | 101.925   | 1        |
| 548 | RAB11FIP1P1   | RAB11FIP1P1   | 0.000560894        | 0.000832548                  | 0.553755                         | -1.80585                          | NC+MYCN down vs NC-CTRL                       | 18.7534      | 44.9916       | 6.39764   | 1        |
| 549 | FPGT          | FPGT          | 0.00158959         | 0.00025175                   | 0.554051                         | -1.80489                          | NC+MYCN down vs NC-CTRL                       | 13.7719      | 3.05682       | 0.591894  | 1        |
| 550 | DBF4B         | DBF4B         | 0.0151407          | 0.00584927                   | 0.55502                          | -1.80174                          | NC+MYCN down vs NC-CTRL                       | 6.5454       | 49.3231       | 20.0948   | 1        |
| 551 | RP11-230B22.1 | RP11-230B22.1 | 0.0052112          | 0.0081232                    | 0.555952                         | -1.79872                          | NC+MYCN down vs NC-CTRL                       | 9.46686      | 1.76792       | 0.497994  | 1        |
| 552 | SMG9          | SMG9          | 0.00020536         | 3.42E-05                     | 0.556591                         | -1.79665                          | NC+MYCN down vs NC-CTRL                       | 24.9548      | 38.4008       | 4.1035    | 1        |
| 553 | ZWINT         | ZWINT         | 0.0115145          | 0.00263017                   | 0.556785                         | -1.79603                          | NC+MYCN down vs NC-CTRL                       | 7.22344      | 594.123       | 219.331   | 1        |
| 554 | ZNF823        | ZNF823        | 0.000526799        | 0.000129291                  | 0.556905                         | -1.79564                          | NC+MYCN down vs NC-CTRL                       | 19.0967      | 4.09997       | 0.572521  | 1        |
| 555 | FAS           | FAS           | 0.00265127         | 0.0036138                    | 0.557386                         | -1.79409                          | NC+MYCN down vs NC-CTRL                       | 11.7604      | 0.829251      | 0.188033  | 1        |
| 556 | PABPC5        | PABPC5        | 5.03E-05           | 0.000839126                  | 0.557478                         | -1.79379                          | NC+MYCN down vs NC-CTRL                       | 36.7187      | 59.0772       | 4.29043   | 1        |
| 557 | ZNF350        | ZNF350        | 0.00536721         | 0.00478718                   | 0.557787                         | -1.7928                           | NC+MYCN down vs NC-CTRL                       | 9.37525      | 1.04348       | 0.296803  | 1        |
| 558 | WEE1          | WEE1          | 0.0222427          | 0.0051285                    | 0.558354                         | -1.79098                          | NC+MYCN down vs NC-CTRL                       | 5.66687      | 29.3505       | 13.8115   | 1        |
| 559 | ZNF45         | ZNF45         | 0.000318087        | 0.00295786                   | 0.559327                         | -1.78786                          | NC+MYCN down vs NC-CTRL                       | 22.0622      | 36.4555       | 4.40639   | 1        |



|     | Probeset ID   | Gene Symbol   | p-value(Attribute) | p-value(NC+MYCN vs. NC-CTRL) | MeanRatio(NC+MYCN N vs. NC-CTRL) | FoldChange(NC+MYCN N vs. NC-CTRL) | FoldChange(NC+MYCN vs. NC-CTRL) (Description) | F(Attribute) | SS(Attribute) | SS(Error) | F(Error) |
|-----|---------------|---------------|--------------------|------------------------------|----------------------------------|-----------------------------------|-----------------------------------------------|--------------|---------------|-----------|----------|
| 560 | CDC25C        | CDC25C        | 0.000712209        | 0.00131377                   | 0.560208                         | -1.78505                          | NC+MYCN down vs NC-CTRL                       | 17.4944      | 57.4219       | 8.75282   | 1        |
| 561 | FIZ1          | FIZ1          | 0.00101479         | 0.00274314                   | 0.560426                         | -1.78436                          | NC+MYCN down vs NC-CTRL                       | 15.7606      | 8.35581       | 1.41379   | 1        |
| 562 | TNFSF13       | TNFSF13       | 0.00452168         | 0.00876492                   | 0.56055                          | -1.78396                          | NC+MYCN down vs NC-CTRL                       | 9.91712      | 1.07421       | 0.288849  | 1        |
| 563 | PPP1R15A      | PPP1R15A      | 0.00225785         | 0.000940185                  | 0.560689                         | -1.78352                          | NC+MYCN down vs NC-CTRL                       | 12.3646      | 39.8162       | 8.58713   | 1        |
| 564 | DHRS4         | DHRS4         | 0.00555221         | 0.00313427                   | 0.560904                         | -1.78284                          | NC+MYCN down vs NC-CTRL                       | 9.27083      | 9.6806        | 2.78453   | 1        |
| 565 | REST          | REST          | 2.04E-05           | 0.000109906                  | 0.561015                         | -1.78248                          | NC+MYCN down vs NC-CTRL                       | 46.7735      | 105.582       | 6.01949   | 1        |
| 566 | SYNE4         | SYNE4         | 0.0126766          | 0.00902254                   | 0.56152                          | -1.78088                          | NC+MYCN down vs NC-CTRL                       | 6.98008      | 0.198082      | 0.0756752 | 1        |
| 567 | ASPM          | ASPM          | 0.000131196        | 2.28E-05                     | 0.561779                         | -1.78006                          | NC+MYCN down vs NC-CTRL                       | 28.2634      | 306.037       | 28.8747   | 1        |
| 568 | SOS2          | SOS2          | 0.000372548        | 6.96E-05                     | 0.562384                         | -1.77815                          | NC+MYCN down vs NC-CTRL                       | 21.0927      | 23.4016       | 2.95857   | 1        |
| 569 | ZNF554        | ZNF554        | 0.00169779         | 0.000328634                  | 0.563287                         | -1.77529                          | NC+MYCN down vs NC-CTRL                       | 13.4984      | 0.831962      | 0.164358  | 1        |
| 570 | ZFP28         | ZFP28         | 0.00668573         | 0.000959721                  | 0.563898                         | -1.77337                          | NC+MYCN down vs NC-CTRL                       | 8.71375      | 1.79775       | 0.550164  | 1        |
| 571 | BCORL1        | BCORL1        | 0.00447312         | 0.0118588                    | 0.564085                         | -1.77278                          | NC+MYCN down vs NC-CTRL                       | 9.95203      | 500.259       | 134.045   | 1        |
| 572 | SLC24A1       | SLC24A1       | 0.0101267          | 0.00205452                   | 0.564162                         | -1.77254                          | NC+MYCN down vs NC-CTRL                       | 7.55765      | 1.55378       | 0.548242  | 1        |
| 573 | SLC44A2       | SLC44A2       | 0.00725311         | 0.00904979                   | 0.564244                         | -1.77228                          | NC+MYCN down vs NC-CTRL                       | 8.47747      | 578.021       | 181.822   | 1        |
| 574 | JOSD2         | JOSD2         | 0.00281449         | 0.00119766                   | 0.56452                          | -1.77142                          | NC+MYCN down vs NC-CTRL                       | 11.5417      | 6.33839       | 1.64446   | 1        |
| 575 | PPP2R3A       | PPP2R3A       | 0.000119803        | 7.63E-05                     | 0.564595                         | -1.77118                          | NC+MYCN down vs NC-CTRL                       | 28.9805      | 16.7454       | 1.54084   | 1        |
| 576 | ACTB          | ACTB          | 0.00880588         | 0.00144983                   | 0.564755                         | -1.77068                          | NC+MYCN down vs NC-CTRL                       | 7.9336       | 208271        | 70004.5   | 1        |
| 577 | CEL           | CEL           | 0.000447331        | 0.000273901                  | 0.565439                         | -1.76854                          | NC+MYCN down vs NC-CTRL                       | 20.0173      | 2.85003       | 0.379675  | 1        |
| 578 | ZNF700        | ZNF700        | 0.00368026         | 0.000564805                  | 0.565535                         | -1.76824                          | NC+MYCN down vs NC-CTRL                       | 10.5992      | 9.51443       | 2.39374   | 1        |
| 579 | C14orf1       | C14orf1       | 2.35E-05           | 0.000142854                  | 0.565994                         | -1.7668                           | NC+MYCN down vs NC-CTRL                       | 45.0376      | 817.98        | 48.4325   | 1        |
| 580 | PBX2P1        | PBX2P1        | 0.000182155        | 0.000469419                  | 0.566824                         | -1.76421                          | NC+MYCN down vs NC-CTRL                       | 25.8043      | 949.54        | 98.1275   | 1        |
| 581 | RIN3          | RIN3          | 1.32E-05           | 0.000451319                  | 0.566954                         | -1.76381                          | NC+MYCN down vs NC-CTRL                       | 52.52        | 14.7648       | 0.749672  | 1        |
| 582 | TMSB15B       | TMSB15B       | 0.000790747        | 0.00362438                   | 0.567308                         | -1.76271                          | NC+MYCN down vs NC-CTRL                       | 16.9661      | 88.425        | 13.8983   | 1        |
| 583 | EGLN2         | EGLN2         | 0.0130342          | 0.00425981                   | 0.567449                         | -1.76227                          | NC+MYCN down vs NC-CTRL                       | 6.91075      | 34.8276       | 13.439    | 1        |
| 584 | ZNF226        | ZNF226        | 0.0188963          | 0.00588096                   | 0.567531                         | -1.76202                          | NC+MYCN down vs NC-CTRL                       | 6.02917      | 6.89467       | 3.04947   | 1        |
| 585 | PPM1K         | PPM1K         | 0.00490594         | 0.010758                     | 0.567863                         | -1.76099                          | NC+MYCN down vs NC-CTRL                       | 9.65642      | 13.1189       | 3.62285   | 1        |
| 586 | CARD8         | CARD8         | 0.000289961        | 0.00130142                   | 0.568049                         | -1.76041                          | NC+MYCN down vs NC-CTRL                       | 22.6482      | 35.7955       | 4.21468   | 1        |
| 587 | CDCA8         | CDCA8         | 0.005349           | 0.00329656                   | 0.56825                          | -1.75979                          | NC+MYCN down vs NC-CTRL                       | 9.38577      | 705.357       | 200.405   | 1        |
| 588 | PRPSAP1       | PRPSAP1       | 0.0133463          | 0.0036306                    | 0.56927                          | -1.75663                          | NC+MYCN down vs NC-CTRL                       | 6.85213      | 28.5116       | 11.0959   | 1        |
| 589 | ERF           | ERF           | 0.0138957          | 0.00536065                   | 0.569374                         | -1.75632                          | NC+MYCN down vs NC-CTRL                       | 6.75301      | 456.061       | 180.092   | 1        |
| 590 | UBE2E3        | UBE2E3        | 2.77E-05           | 5.20E-05                     | 0.569562                         | -1.75574                          | NC+MYCN down vs NC-CTRL                       | 43.086       | 1600.44       | 99.0538   | 1        |
| 591 | ZNF879        | ZNF879        | 0.0027878          | 0.00107448                   | 0.570109                         | -1.75405                          | NC+MYCN down vs NC-CTRL                       | 11.5764      | 1.60254       | 0.369153  | 1        |
| 592 | RP11-108P20.1 | RP11-108P20.1 | 0.00289087         | 0.00145621                   | 0.570337                         | -1.75335                          | NC+MYCN down vs NC-CTRL                       | 11.4448      | 0.539426      | 0.125688  | 1        |
| 593 | TRAPPC2P1     | TRAPPC2P1     | 0.0109052          | 0.00260545                   | 0.570459                         | -1.75298                          | NC+MYCN down vs NC-CTRL                       | 7.36363      | 1.05072       | 0.380506  | 1        |
| 594 | ZMYM3         | ZMYM3         | 2.92E-05           | 7.96E-05                     | 0.570715                         | -1.75219                          | NC+MYCN down vs NC-CTRL                       | 42.4992      | 1042.59       | 65.4185   | 1        |
| 595 | ZNF331        | ZNF331        | 0.00152834         | 0.00037202                   | 0.571266                         | -1.7505                           | NC+MYCN down vs NC-CTRL                       | 13.9373      | 18.3731       | 3.51539   | 1        |
| 596 | SMCO4         | SMCO4         | 0.00113909         | 0.00522768                   | 0.571406                         | -1.75007                          | NC+MYCN down vs NC-CTRL                       | 15.2271      | 37.4319       | 6.5553    | 1        |
| 597 | RNF122        | RNF122        | 0.00540819         | 0.0111463                    | 0.572187                         | -1.74768                          | NC+MYCN down vs NC-CTRL                       | 9.35174      | 50.0044       | 14.2589   | 1        |
| 598 | EFCAB11       | EFCAB11       | 0.00133726         | 0.000460331                  | 0.572306                         | -1.74732                          | NC+MYCN down vs NC-CTRL                       | 14.5116      | 0.536966      | 0.0986732 | 1        |
| 599 | ZNF260        | ZNF260        | 0.00179285         | 0.000291107                  | 0.572449                         | -1.74688                          | NC+MYCN down vs NC-CTRL                       | 13.2754      | 50.1159       | 10.0669   | 1        |
| 600 | HHLA3         | HHLA3         | 8.03E-05           | 0.000197766                  | 0.572536                         | -1.74662                          | NC+MYCN down vs NC-CTRL                       | 32.3349      | 26.4428       | 2.18074   | 1        |
| 601 | CTD-2287O16.5 | CTD-2287O16.5 | 0.000477761        | 0.000659361                  | 0.572717                         | -1.74606                          | NC+MYCN down vs NC-CTRL                       | 19.6423      | 1.13607       | 0.154235  | 1        |
| 602 | SFXN5         | SFXN5         | 0.0054524          | 0.00147476                   | 0.57361                          | -1.74334                          | NC+MYCN down vs NC-CTRL                       | 9.32662      | 0.99152       | 0.283495  | 1        |

|     | Probeset ID   | Gene Symbol   | p-value(Attribute) | p-value(NC+MYCN vs. NC-CTRL) | MeanRatio(NC+MYCN N vs. NC-CTRL) | FoldChange(NC+MYCN N vs. NC-CTRL) | FoldChange(NC+MYCN vs. NC-CTRL) (Description) | F(Attribute) | SS(Attribute) | SS(Error) | F(Error) |
|-----|---------------|---------------|--------------------|------------------------------|----------------------------------|-----------------------------------|-----------------------------------------------|--------------|---------------|-----------|----------|
| 603 | CDC20P1       | CDC20P1       | 0.00657059         | 0.0074103                    | 0.573713                         | -1.74303                          | NC+MYCN down vs NC-CTRL                       | 8.76476      | 37.6166       | 11.4448   | 1        |
| 604 | ELMO2         | ELMO2         | 0.00142644         | 0.000541811                  | 0.574271                         | -1.74134                          | NC+MYCN down vs NC-CTRL                       | 14.2316      | 44.7473       | 8.38459   | 1        |
| 605 | ZNF669        | ZNF669        | 2.64E-07           | 2.28E-05                     | 0.574449                         | -1.7408                           | NC+MYCN down vs NC-CTRL                       | 144.415      | 53.7865       | 0.993188  | 1        |
| 606 | ANKRD6        | ANKRD6        | 0.000161568        | 0.00136091                   | 0.575028                         | -1.73904                          | NC+MYCN down vs NC-CTRL                       | 26.6797      | 13.0103       | 1.30039   | 1        |
| 607 | AC009948.5    | AC009948.5    | 0.00201465         | 0.000438206                  | 0.5752                           | -1.73853                          | NC+MYCN down vs NC-CTRL                       | 12.8082      | 12.9465       | 2.69547   | 1        |
| 608 | ZNF425        | ZNF425        | 0.00472899         | 0.00290315                   | 0.575764                         | -1.73682                          | NC+MYCN down vs NC-CTRL                       | 9.77318      | 1.9137        | 0.522163  | 1        |
| 609 | STX5          | STX5          | 0.00323621         | 0.00120768                   | 0.575781                         | -1.73677                          | NC+MYCN down vs NC-CTRL                       | 11.0432      | 47.5186       | 11.4746   | 1        |
| 610 | RP11-357C3.3  | RP11-357C3.3  | 0.00222854         | 0.000345488                  | 0.57581                          | -1.73668                          | NC+MYCN down vs NC-CTRL                       | 12.4148      | 15.9525       | 3.42656   | 1        |
| 611 | ZNF180        | ZNF180        | 0.00136521         | 0.00252495                   | 0.576217                         | -1.73546                          | NC+MYCN down vs NC-CTRL                       | 14.4214      | 7.35515       | 1.36004   | 1        |
| 612 | GLUD1P2       | GLUD1P2       | 0.0136333          | 0.00355395                   | 0.57673                          | -1.73391                          | NC+MYCN down vs NC-CTRL                       | 6.79974      | 0.44082       | 0.172877  | 1        |
| 613 | IFI27         | IFI27         | 0.000309968        | 0.00397069                   | 0.576952                         | -1.73325                          | NC+MYCN down vs NC-CTRL                       | 22.2245      | 4.23217       | 0.507808  | 1        |
| 614 | ADAM8         | ADAM8         | 0.00537422         | 0.0098278                    | 0.577288                         | -1.73224                          | NC+MYCN down vs NC-CTRL                       | 9.37121      | 0.200964      | 0.0571864 | 1        |
| 615 | KRBOX4        | KRBOX4        | 0.0023188          | 0.000319027                  | 0.577849                         | -1.73056                          | NC+MYCN down vs NC-CTRL                       | 12.2627      | 4.19454       | 0.912151  | 1        |
| 616 | PALLD         | PALLD         | 0.0048478          | 0.0114626                    | 0.578029                         | -1.73002                          | NC+MYCN down vs NC-CTRL                       | 9.69419      | 110.034       | 30.2679   | 1        |
| 617 | KCTD15        | KCTD15        | 0.0147745          | 0.00796426                   | 0.578871                         | -1.7275                           | NC+MYCN down vs NC-CTRL                       | 6.6042       | 177.24        | 71.5664   | 1        |
| 618 | FLCN          | FLCN          | 2.04E-05           | 0.000120083                  | 0.580295                         | -1.72326                          | NC+MYCN down vs NC-CTRL                       | 46.7793      | 18.6309       | 1.06206   | 1        |
| 619 | SH3BP1        | SH3BP1        | 0.00242483         | 0.00627646                   | 0.580346                         | -1.72311                          | NC+MYCN down vs NC-CTRL                       | 12.0932      | 40.4051       | 8.90971   | 1        |
| 620 | CREB3         | CREB3         | 0.000133147        | 0.000126045                  | 0.580429                         | -1.72286                          | NC+MYCN down vs NC-CTRL                       | 28.1484      | 92.8431       | 8.79558   | 1        |
| 621 | CNTLN         | CNTLN         | 4.75E-06           | 0.0010053                    | 0.580583                         | -1.72241                          | NC+MYCN down vs NC-CTRL                       | 68.6211      | 7.416         | 0.288191  | 1        |
| 622 | RFTN2         | RFTN2         | 3.25E-06           | 0.000214041                  | 0.580641                         | -1.72224                          | NC+MYCN down vs NC-CTRL                       | 75.7487      | 158.659       | 5.58546   | 1        |
| 623 | SGOL2         | SGOL2         | 1.37E-05           | 1.50E-05                     | 0.580894                         | -1.72148                          | NC+MYCN down vs NC-CTRL                       | 52.0085      | 200.427       | 10.2766   | 1        |
| 624 | HECTD2        | HECTD2        | 2.23E-05           | 0.000145081                  | 0.581153                         | -1.72072                          | NC+MYCN down vs NC-CTRL                       | 45.6756      | 33.9523       | 1.98223   | 1        |
| 625 | UBE2E2        | UBE2E2        | 0.00428063         | 0.00490976                   | 0.581367                         | -1.72008                          | NC+MYCN down vs NC-CTRL                       | 10.0952      | 31.2631       | 8.25819   | 1        |
| 626 | STAT2         | STAT2         | 0.0144986          | 0.0101151                    | 0.581932                         | -1.71841                          | NC+MYCN down vs NC-CTRL                       | 6.6497       | 83.0153       | 33.2909   | 1        |
| 627 | RP11-143J12.2 | RP11-143J12.2 | 0.0136979          | 0.0102927                    | 0.582041                         | -1.71809                          | NC+MYCN down vs NC-CTRL                       | 6.78813      | 0.389655      | 0.153073  | 1        |
| 628 | RP11-344N10.5 | RP11-344N10.5 | 0.00195533         | 0.000284753                  | 0.582304                         | -1.71732                          | NC+MYCN down vs NC-CTRL                       | 12.9266      | 0.0570481     | 0.0117686 | 1        |
| 629 | TRIM5         | TRIM5         | 6.03E-05           | 0.0014411                    | 0.58238                          | -1.71709                          | NC+MYCN down vs NC-CTRL                       | 34.9657      | 136.589       | 10.417    | 1        |
| 630 | FANCG         | FANCG         | 0.000988229        | 0.00026761                   | 0.582835                         | -1.71575                          | NC+MYCN down vs NC-CTRL                       | 15.8852      | 74.0784       | 12.4356   | 1        |
| 631 | IQCG          | IQCG          | 2.40E-05           | 0.000155349                  | 0.582843                         | -1.71573                          | NC+MYCN down vs NC-CTRL                       | 44.7856      | 1.24799       | 0.0743088 | 1        |
| 632 | DLEU2         | DLEU2         | 0.00226525         | 0.00192817                   | 0.583874                         | -1.7127                           | NC+MYCN down vs NC-CTRL                       | 12.352       | 27.5449       | 5.94662   | 1        |
| 633 | KBTBD2        | KBTBD2        | 4.87E-05           | 0.00111593                   | 0.583876                         | -1.71269                          | NC+MYCN down vs NC-CTRL                       | 37.0328      | 120.888       | 8.70496   | 1        |
| 634 | DLGAP5        | DLGAP5        | 1.48E-05           | 5.46E-05                     | 0.584004                         | -1.71232                          | NC+MYCN down vs NC-CTRL                       | 50.9441      | 1513.61       | 79.2299   | 1        |
| 635 | SMUG1         | SMUG1         | 1.37E-05           | 0.00682669                   | 0.58405                          | -1.71218                          | NC+MYCN down vs NC-CTRL                       | 51.9931      | 27.1573       | 1.39286   | 1        |
| 636 | CSRNP2        | CSRNP2        | 5.07E-05           | 8.46E-06                     | 0.584266                         | -1.71155                          | NC+MYCN down vs NC-CTRL                       | 36.6419      | 65.8466       | 4.79208   | 1        |
| 637 | CEP19         | CEP19         | 0.000275373        | 0.00049933                   | 0.584375                         | -1.71123                          | NC+MYCN down vs NC-CTRL                       | 22.9808      | 12.2081       | 1.41662   | 1        |
| 638 | HNRNPA1P48    | HNRNPA1P48    | 0.00670689         | 0.0102396                    | 0.584489                         | -1.7109                           | NC+MYCN down vs NC-CTRL                       | 8.70449      | 46021.1       | 14098.8   | 1        |
| 639 | MTMR3         | MTMR3         | 0.00502444         | 0.00162787                   | 0.584761                         | -1.7101                           | NC+MYCN down vs NC-CTRL                       | 9.58113      | 13.2857       | 3.69773   | 1        |
| 640 | BRD8          | BRD8          | 9.13E-05           | 5.66E-05                     | 0.584788                         | -1.71002                          | NC+MYCN down vs NC-CTRL                       | 31.2231      | 152.441       | 13.0196   | 1        |
| 641 | RAB23         | RAB23         | 0.0102021          | 0.0025819                    | 0.584952                         | -1.70954                          | NC+MYCN down vs NC-CTRL                       | 7.53805      | 30.9581       | 10.9517   | 1        |
| 642 | OSCP1         | OSCP1         | 0.00452145         | 0.00760933                   | 0.585023                         | -1.70933                          | NC+MYCN down vs NC-CTRL                       | 9.91728      | 1.39803       | 0.375918  | 1        |
| 643 | NCAPG         | NCAPG         | 9.00E-05           | 3.72E-05                     | 0.585997                         | -1.70649                          | NC+MYCN down vs NC-CTRL                       | 31.3485      | 595.492       | 50.6557   | 1        |
| 644 | ZNF440        | ZNF440        | 0.0147309          | 0.00522238                   | 0.586782                         | -1.70421                          | NC+MYCN down vs NC-CTRL                       | 6.61131      | 2.61421       | 1.05444   | 1        |
| 645 | TMEM14A       | TMEM14A       | 0.000282976        | 0.0072298                    | 0.587393                         | -1.70244                          | NC+MYCN down vs NC-CTRL                       | 22.8048      | 245.958       | 28.761    | 1        |

|     | Probeset ID   | Gene Symbol   | p-value(Attribute) | p-value(NC+MYCN vs. NC-CTRL) | MeanRatio(NC+MYCN N vs. NC-CTRL) | FoldChange(NC+MYCN N vs. NC-CTRL) | FoldChange(NC+MYCN vs. NC-CTRL) (Description) | F(Attribute) | SS(Attribute) | SS(Error) | F(Error) |
|-----|---------------|---------------|--------------------|------------------------------|----------------------------------|-----------------------------------|-----------------------------------------------|--------------|---------------|-----------|----------|
| 646 | FAM83D        | FAM83D        | 0.00182247         | 0.000981023                  | 0.587469                         | -1.70222                          | NC+MYCN down vs NC-CTRL                       | 13.209       | 174.072       | 35.1421   | 1        |
| 647 | ZNF672        | ZNF672        | 0.0169363          | 0.0112298                    | 0.588466                         | -1.69933                          | NC+MYCN down vs NC-CTRL                       | 6.28078      | 31.5927       | 13.4135   | 1        |
| 648 | ZNF230        | ZNF230        | 0.00060537         | 0.0101402                    | 0.588585                         | -1.69899                          | NC+MYCN down vs NC-CTRL                       | 18.343       | 1.27603       | 0.185507  | 1        |
| 649 | MUS81         | MUS81         | 0.00556335         | 0.00175587                   | 0.588744                         | -1.69853                          | NC+MYCN down vs NC-CTRL                       | 9.26468      | 8.66191       | 2.49317   | 1        |
| 650 | 7-Sep         | 7-Sep         | 0.000372549        | 0.000120886                  | 0.588934                         | -1.69798                          | NC+MYCN down vs NC-CTRL                       | 21.0927      | 532.266       | 67.2922   | 1        |
| 651 | ZNF611        | ZNF611        | 1.63E-05           | 0.000410156                  | 0.589744                         | -1.69565                          | NC+MYCN down vs NC-CTRL                       | 49.6233      | 1.74835       | 0.0939533 | 1        |
| 652 | ZNF222        | ZNF222        | 7.82E-05           | 0.000142621                  | 0.590231                         | -1.69425                          | NC+MYCN down vs NC-CTRL                       | 32.5692      | 3.98612       | 0.326372  | 1        |
| 653 | TFE3          | TFE3          | 9.80E-07           | 9.13E-06                     | 0.590951                         | -1.69219                          | NC+MYCN down vs NC-CTRL                       | 103.206      | 425.193       | 10.9862   | 1        |
| 654 | PHF6          | PHF6          | 3.04E-06           | 0.000122142                  | 0.59118                          | -1.69153                          | NC+MYCN down vs NC-CTRL                       | 77.022       | 9078.08       | 314.303   | 1        |
| 655 | TRO           | TRO           | 7.31E-05           | 0.00026195                   | 0.59128                          | -1.69125                          | NC+MYCN down vs NC-CTRL                       | 33.1793      | 538.467       | 43.2774   | 1        |
| 656 | ZSWIM3        | ZSWIM3        | 0.00607628         | 0.000837722                  | 0.591496                         | -1.69063                          | NC+MYCN down vs NC-CTRL                       | 8.99716      | 0.64195       | 0.190268  | 1        |
| 657 | FMO4          | FMO4          | 5.29E-05           | 0.00249599                   | 0.591509                         | -1.69059                          | NC+MYCN down vs NC-CTRL                       | 36.2151      | 3.14754       | 0.231766  | 1        |
| 658 | TRAF4         | TRAF4         | 0.0008231          | 0.000756464                  | 0.591951                         | -1.68933                          | NC+MYCN down vs NC-CTRL                       | 16.7672      | 84.3956       | 13.4223   | 1        |
| 659 | ZNF707        | ZNF707        | 0.00546808         | 0.00907733                   | 0.592262                         | -1.68844                          | NC+MYCN down vs NC-CTRL                       | 9.31777      | 0.666623      | 0.190782  | 1        |
| 660 | PQLC2         | PQLC2         | 0.000802087        | 0.00133564                   | 0.592371                         | -1.68813                          | NC+MYCN down vs NC-CTRL                       | 16.8953      | 15.1279       | 2.38772   | 1        |
| 661 | PRICKLE2      | PRICKLE2      | 6.78E-05           | 0.0027573                    | 0.592417                         | -1.688                            | NC+MYCN down vs NC-CTRL                       | 33.8649      | 9.59208       | 0.755322  | 1        |
| 662 | CPQ           | CPQ           | 1.45E-05           | 0.00085612                   | 0.592653                         | -1.68733                          | NC+MYCN down vs NC-CTRL                       | 51.1581      | 3.11199       | 0.162216  | 1        |
| 663 | COL2A1        | COL2A1        | 0.000327979        | 0.0112512                    | 0.593205                         | -1.68576                          | NC+MYCN down vs NC-CTRL                       | 21.8714      | 41963.4       | 5116.39   | 1        |
| 664 | HP1BP3        | HP1BP3        | 0.00348722         | 0.00291384                   | 0.593311                         | -1.68546                          | NC+MYCN down vs NC-CTRL                       | 10.7835      | 1473.43       | 364.365   | 1        |
| 665 | VPS9D1        | VPS9D1        | 0.00100766         | 0.00292767                   | 0.593564                         | -1.68474                          | NC+MYCN down vs NC-CTRL                       | 15.7936      | 15.5596       | 2.62715   | 1        |
| 666 | MMAA          | MMAA          | 0.014052           | 0.00454136                   | 0.593886                         | -1.68382                          | NC+MYCN down vs NC-CTRL                       | 6.72569      | 0.326162      | 0.12932   | 1        |
| 667 | CNP           | CNP           | 0.00155705         | 0.00237114                   | 0.594414                         | -1.68233                          | NC+MYCN down vs NC-CTRL                       | 13.8588      | 197.887       | 38.077    | 1        |
| 668 | MEA1          | MEA1          | 0.00206361         | 0.0106051                    | 0.594749                         | -1.68138                          | NC+MYCN down vs NC-CTRL                       | 12.7137      | 1353.01       | 283.79    | 1        |
| 669 | MELK          | MELK          | 2.23E-05           | 1.06E-05                     | 0.594765                         | -1.68134                          | NC+MYCN down vs NC-CTRL                       | 45.6839      | 246.819       | 14.4073   | 1        |
| 670 | TOX4P1        | TOX4P1        | 0.0084585          | 0.00285289                   | 0.594865                         | -1.68106                          | NC+MYCN down vs NC-CTRL                       | 8.0443       | 0.0931046     | 0.0308639 | 1        |
| 671 | RP11-457K10.2 | RP11-457K10.2 | 0.00832508         | 0.00717688                   | 0.595193                         | -1.68013                          | NC+MYCN down vs NC-CTRL                       | 8.08834      | 5.02675       | 1.65728   | 1        |
| 672 | SPC25         | SPC25         | 0.00687582         | 0.0013814                    | 0.595511                         | -1.67923                          | NC+MYCN down vs NC-CTRL                       | 8.63189      | 50.0434       | 15.46     | 1        |
| 673 | C2orf42       | C2orf42       | 0.0182394          | 0.00703651                   | 0.595949                         | -1.678                            | NC+MYCN down vs NC-CTRL                       | 6.10973      | 2.45261       | 1.07047   | 1        |
| 674 | WNK3          | WNK3          | 0.000732526        | 0.000959098                  | 0.596382                         | -1.67678                          | NC+MYCN down vs NC-CTRL                       | 17.351       | 3.77599       | 0.580332  | 1        |
| 675 | PLOD3         | PLOD3         | 0.000225932        | 0.00385224                   | 0.596872                         | -1.6754                           | NC+MYCN down vs NC-CTRL                       | 24.2965      | 147.477       | 16.1863   | 1        |
| 676 | LINC00669     | LINC00669     | 2.01E-06           | 0.000110812                  | 0.597355                         | -1.67405                          | NC+MYCN down vs NC-CTRL                       | 85.8024      | 28.1023       | 0.873397  | 1        |
| 677 | CALM3         | CALM3         | 0.00364569         | 0.00419079                   | 0.598491                         | -1.67087                          | NC+MYCN down vs NC-CTRL                       | 10.6313      | 15802.2       | 3963.69   | 1        |
| 678 | MAP3K12       | MAP3K12       | 0.00180106         | 0.000522008                  | 0.598526                         | -1.67077                          | NC+MYCN down vs NC-CTRL                       | 13.2569      | 14.6723       | 2.95138   | 1        |
| 679 | ARHGEF39      | ARHGEF39      | 0.000297459        | 0.000206164                  | 0.599934                         | -1.66685                          | NC+MYCN down vs NC-CTRL                       | 22.4852      | 7.89961       | 0.936865  | 1        |
| 680 | PARD6G        | PARD6G        | 1.91E-05           | 2.87E-05                     | 0.600136                         | -1.66629                          | NC+MYCN down vs NC-CTRL                       | 47.6126      | 34.887        | 1.95394   | 1        |
| 681 | RP11-390B4.5  | RP11-390B4.5  | 0.00041115         | 0.00159763                   | 0.600282                         | -1.66588                          | NC+MYCN down vs NC-CTRL                       | 20.507       | 1.97996       | 0.257467  | 1        |
| 682 | ZNF155        | ZNF155        | 0.016023           | 0.00594738                   | 0.600297                         | -1.66584                          | NC+MYCN down vs NC-CTRL                       | 6.41076      | 4.12474       | 1.71575   | 1        |
| 683 | TOPORS-AS1    | TOPORS-AS1    | 0.000127481        | 0.000114998                  | 0.600324                         | -1.66577                          | NC+MYCN down vs NC-CTRL                       | 28.4884      | 0.61072       | 0.0571666 | 1        |
| 684 | UCK1          | UCK1          | 0.000161603        | 0.00012631                   | 0.600557                         | -1.66512                          | NC+MYCN down vs NC-CTRL                       | 26.6781      | 52.5142       | 5.24917   | 1        |
| 685 | SEMA4C        | SEMA4C        | 0.00131407         | 0.000827709                  | 0.600718                         | -1.66468                          | NC+MYCN down vs NC-CTRL                       | 14.5883      | 53.8337       | 9.84054   | 1        |
| 686 | C12orf60      | C12orf60      | 0.0042116          | 0.00881467                   | 0.600762                         | -1.66455                          | NC+MYCN down vs NC-CTRL                       | 10.1485      | 0.541114      | 0.142185  | 1        |
| 687 | CLK4          | CLK4          | 7.87E-06           | 3.55E-05                     | 0.600958                         | -1.66401                          | NC+MYCN down vs NC-CTRL                       | 60.1227      | 16.7568       | 0.743227  | 1        |
| 688 | MDFI          | MDFI          | 0.000120655        | 0.00407956                   | 0.601297                         | -1.66307                          | NC+MYCN down vs NC-CTRL                       | 28.924       | 2431.97       | 224.218   | 1        |

|     | Probeset ID  | Gene Symbol  | p-value(Attribute) | p-value(NC+MYCN vs. NC-CTRL) | MeanRatio(NC+MYCN N vs. NC-CTRL) | FoldChange(NC+MYCN N vs. NC-CTRL) | FoldChange(NC+MYCN vs. NC-CTRL) (Description) | F(Attribute) | SS(Attribute) | SS(Error) | F(Error) |
|-----|--------------|--------------|--------------------|------------------------------|----------------------------------|-----------------------------------|-----------------------------------------------|--------------|---------------|-----------|----------|
| 689 | ZNF780A      | ZNF780A      | 0.00602916         | 0.00116722                   | 0.601465                         | -1.66261                          | NC+MYCN down vs NC-CTRL                       | 9.02054      | 4.02042       | 1.18852   | 1        |
| 690 | CCDC142      | CCDC142      | 0.0152564          | 0.00297234                   | 0.601541                         | -1.6624                           | NC+MYCN down vs NC-CTRL                       | 6.5272       | 1.19374       | 0.487698  | 1        |
| 691 | ESCO2        | ESCO2        | 0.000316291        | 0.000726009                  | 0.601618                         | -1.66218                          | NC+MYCN down vs NC-CTRL                       | 22.0977      | 7.14163       | 0.861825  | 1        |
| 692 | AKIP1        | AKIP1        | 0.000719181        | 0.000713786                  | 0.601645                         | -1.66211                          | NC+MYCN down vs NC-CTRL                       | 17.4446      | 13.5171       | 2.06629   | 1        |
| 693 | CKAP2        | CKAP2        | 0.0010413          | 0.000348629                  | 0.602052                         | -1.66099                          | NC+MYCN down vs NC-CTRL                       | 15.6402      | 1603.52       | 273.401   | 1        |
| 694 | IRF9         | IRF9         | 0.00472182         | 0.00257312                   | 0.602049                         | -1.66099                          | NC+MYCN down vs NC-CTRL                       | 9.77803      | 7.87769       | 2.1484    | 1        |
| 695 | KBTBD7       | KBTBD7       | 2.24E-05           | 7.47E-06                     | 0.602054                         | -1.66098                          | NC+MYCN down vs NC-CTRL                       | 45.6147      | 15.5915       | 0.911491  | 1        |
| 696 | TIRAP        | TIRAP        | 0.00420811         | 0.000891517                  | 0.602144                         | -1.66073                          | NC+MYCN down vs NC-CTRL                       | 10.1513      | 1.6106        | 0.423095  | 1        |
| 697 | SEN7         | SEN7         | 8.53E-06           | 4.89E-05                     | 0.602597                         | -1.65948                          | NC+MYCN down vs NC-CTRL                       | 58.8623      | 100.357       | 4.54652   | 1        |
| 698 | DNAL4        | DNAL4        | 0.0146493          | 0.005929                     | 0.602767                         | -1.65901                          | NC+MYCN down vs NC-CTRL                       | 6.62472      | 10.8655       | 4.37373   | 1        |
| 699 | CFL1         | CFL1         | 0.000103138        | 0.000183497                  | 0.603099                         | -1.6581                           | NC+MYCN down vs NC-CTRL                       | 30.1991      | 6797.29       | 600.221   | 1        |
| 700 | AMOT         | AMOT         | 0.000206284        | 0.00352795                   | 0.603283                         | -1.6576                           | NC+MYCN down vs NC-CTRL                       | 24.9235      | 797.676       | 85.3464   | 1        |
| 701 | BCL9         | BCL9         | 0.00649126         | 0.0024708                    | 0.603311                         | -1.65752                          | NC+MYCN down vs NC-CTRL                       | 8.80056      | 215.206       | 65.2099   | 1        |
| 702 | ARHGEF11     | ARHGEF11     | 0.0096556          | 0.00214034                   | 0.603525                         | -1.65693                          | NC+MYCN down vs NC-CTRL                       | 7.68434      | 35.9742       | 12.484    | 1        |
| 703 | TLN1         | TLN1         | 0.000719928        | 0.000438252                  | 0.604309                         | -1.65478                          | NC+MYCN down vs NC-CTRL                       | 17.4393      | 259.731       | 39.7158   | 1        |
| 704 | LRRFIP2      | LRRFIP2      | 0.000846828        | 0.00085776                   | 0.604349                         | -1.65467                          | NC+MYCN down vs NC-CTRL                       | 16.6275      | 17.0598       | 2.736     | 1        |
| 705 | TADA3        | TADA3        | 0.00658957         | 0.00165161                   | 0.604505                         | -1.65425                          | NC+MYCN down vs NC-CTRL                       | 8.75627      | 66.2626       | 20.1799   | 1        |
| 706 | CDCA5        | CDCA5        | 0.000521614        | 0.000578729                  | 0.604971                         | -1.65297                          | NC+MYCN down vs NC-CTRL                       | 19.1513      | 195.108       | 27.1672   | 1        |
| 707 | ANLN         | ANLN         | 0.00329149         | 0.00116304                   | 0.605227                         | -1.65227                          | NC+MYCN down vs NC-CTRL                       | 10.9839      | 279.867       | 67.9457   | 1        |
| 708 | LIG1         | LIG1         | 2.93E-05           | 1.50E-05                     | 0.605388                         | -1.65183                          | NC+MYCN down vs NC-CTRL                       | 42.4527      | 118.726       | 7.45777   | 1        |
| 709 | VANGL2       | VANGL2       | 0.0192058          | 0.0117749                    | 0.60586                          | -1.65055                          | NC+MYCN down vs NC-CTRL                       | 5.99242      | 203.472       | 90.5466   | 1        |
| 710 | ZNF649       | ZNF649       | 0.00714989         | 0.00858392                   | 0.605964                         | -1.65026                          | NC+MYCN down vs NC-CTRL                       | 8.5187       | 9.97439       | 3.12235   | 1        |
| 711 | BUB1         | BUB1         | 3.30E-07           | 1.16E-06                     | 0.606047                         | -1.65004                          | NC+MYCN down vs NC-CTRL                       | 136.433      | 629.366       | 12.3013   | 1        |
| 712 | PLEKHO2      | PLEKHO2      | 0.000696976        | 0.000725091                  | 0.60655                          | -1.64867                          | NC+MYCN down vs NC-CTRL                       | 17.6053      | 29.0325       | 4.39754   | 1        |
| 713 | KRT222       | KRT222       | 0.000663372        | 0.000191942                  | 0.606883                         | -1.64776                          | NC+MYCN down vs NC-CTRL                       | 17.861       | 0.261231      | 0.039002  | 1        |
| 714 | CCDC15       | CCDC15       | 0.0228209          | 0.00824083                   | 0.607604                         | -1.64581                          | NC+MYCN down vs NC-CTRL                       | 5.61115      | 2.6167        | 1.24357   | 1        |
| 715 | CTNND1       | CTNND1       | 1.81E-05           | 1.79E-05                     | 0.608669                         | -1.64293                          | NC+MYCN down vs NC-CTRL                       | 48.2717      | 552.051       | 30.4969   | 1        |
| 716 | ELAC1        | ELAC1        | 0.000887922        | 0.000835673                  | 0.608905                         | -1.64229                          | NC+MYCN down vs NC-CTRL                       | 16.3967      | 2.86353       | 0.465709  | 1        |
| 717 | LINC00476    | LINC00476    | 0.00938689         | 0.00305084                   | 0.609756                         | -1.64                             | NC+MYCN down vs NC-CTRL                       | 7.76011      | 0.706522      | 0.242788  | 1        |
| 718 | RP3-368A4.5  | RP3-368A4.5  | 0.000353468        | 0.00128774                   | 0.609924                         | -1.63955                          | NC+MYCN down vs NC-CTRL                       | 21.411       | 198.282       | 24.6953   | 1        |
| 719 | AC017099.3   | AC017099.3   | 0.00042314         | 0.000341418                  | 0.609934                         | -1.63952                          | NC+MYCN down vs NC-CTRL                       | 20.339       | 0.280644      | 0.0367955 | 1        |
| 720 | ARMCX6       | ARMCX6       | 6.20E-05           | 4.37E-05                     | 0.609955                         | -1.63946                          | NC+MYCN down vs NC-CTRL                       | 34.6952      | 88.5887       | 6.80892   | 1        |
| 721 | NUF2         | NUF2         | 0.000455535        | 0.000878921                  | 0.610189                         | -1.63884                          | NC+MYCN down vs NC-CTRL                       | 19.9131      | 152.854       | 20.4695   | 1        |
| 722 | DNAJC3-AS1   | DNAJC3-AS1   | 0.00404658         | 0.00889811                   | 0.610357                         | -1.63839                          | NC+MYCN down vs NC-CTRL                       | 10.2805      | 2.2171        | 0.575092  | 1        |
| 723 | MOB3A        | MOB3A        | 0.0132204          | 0.0026832                    | 0.610474                         | -1.63807                          | NC+MYCN down vs NC-CTRL                       | 6.87557      | 11.3873       | 4.41653   | 1        |
| 724 | ENSAP2       | ENSAP2       | 0.00902819         | 0.00380578                   | 0.610614                         | -1.6377                           | NC+MYCN down vs NC-CTRL                       | 7.86558      | 132.038       | 44.7647   | 1        |
| 725 | RP5-874C20.3 | RP5-874C20.3 | 0.000186871        | 4.34E-05                     | 0.610728                         | -1.63739                          | NC+MYCN down vs NC-CTRL                       | 25.6211      | 22.3414       | 2.32532   | 1        |
| 726 | NR2F2-AS1    | NR2F2-AS1    | 7.43E-05           | 0.00495531                   | 0.611191                         | -1.63615                          | NC+MYCN down vs NC-CTRL                       | 33.0299      | 6.01143       | 0.485332  | 1        |
| 727 | ANKRD52      | ANKRD52      | 0.000813301        | 0.00048267                   | 0.61136                          | -1.6357                           | NC+MYCN down vs NC-CTRL                       | 16.8264      | 141.706       | 22.4577   | 1        |
| 728 | KIF15        | KIF15        | 0.00146701         | 0.0034546                    | 0.61155                          | -1.63519                          | NC+MYCN down vs NC-CTRL                       | 14.1114      | 306.852       | 57.9866   | 1        |
| 729 | DCAF15       | DCAF15       | 0.014919           | 0.00730463                   | 0.611779                         | -1.63458                          | NC+MYCN down vs NC-CTRL                       | 6.58077      | 116.452       | 47.1886   | 1        |
| 730 | LINC00665    | LINC00665    | 1.25E-05           | 0.010557                     | 0.611832                         | -1.63443                          | NC+MYCN down vs NC-CTRL                       | 53.2484      | 42.1517       | 2.11095   | 1        |
| 731 | RECK         | RECK         | 0.000695547        | 0.00067312                   | 0.611943                         | -1.63414                          | NC+MYCN down vs NC-CTRL                       | 17.6158      | 15.6917       | 2.37539   | 1        |

|     | Probeset ID   | Gene Symbol   | p-value(Attribute) | p-value(NC+MYCN vs. NC-CTRL) | MeanRatio(NC+MYCN N vs. NC-CTRL) | FoldChange(NC+MYCN N vs. NC-CTRL) | FoldChange(NC+MYCN vs. NC-CTRL) (Description) | F(Attribute) | SS(Attribute) | SS(Error) | F(Error) |
|-----|---------------|---------------|--------------------|------------------------------|----------------------------------|-----------------------------------|-----------------------------------------------|--------------|---------------|-----------|----------|
| 732 | MAP3K11       | MAP3K11       | 0.00431822         | 0.00679843                   | 0.612341                         | -1.63308                          | NC+MYCN down vs NC-CTRL                       | 10.0666      | 23.073        | 6.11207   | 1        |
| 733 | ACTN1         | ACTN1         | 0.00883307         | 0.00668154                   | 0.612538                         | -1.63255                          | NC+MYCN down vs NC-CTRL                       | 7.92517      | 122.852       | 41.3372   | 1        |
| 734 | RP11-677M14.7 | RP11-677M14.7 | 0.00284792         | 0.0095467                    | 0.612551                         | -1.63252                          | NC+MYCN down vs NC-CTRL                       | 11.4989      | 0.185267      | 0.0429645 | 1        |
| 735 | ZNF613        | ZNF613        | 0.00192319         | 0.000641921                  | 0.612989                         | -1.63135                          | NC+MYCN down vs NC-CTRL                       | 12.9927      | 1.15997       | 0.238076  | 1        |
| 736 | ESYT1         | ESYT1         | 0.00425249         | 0.000774977                  | 0.613605                         | -1.62971                          | NC+MYCN down vs NC-CTRL                       | 10.1168      | 101.98        | 26.8806   | 1        |
| 737 | IKZF4         | IKZF4         | 0.00113533         | 0.00447742                   | 0.613696                         | -1.62947                          | NC+MYCN down vs NC-CTRL                       | 15.2422      | 61.7932       | 10.8109   | 1        |
| 738 | ERCC6L        | ERCC6L        | 0.0153604          | 0.00575238                   | 0.613985                         | -1.62871                          | NC+MYCN down vs NC-CTRL                       | 6.51097      | 16.7489       | 6.85975   | 1        |
| 739 | TOP2A         | TOP2A         | 0.000409324        | 0.000253328                  | 0.614222                         | -1.62808                          | NC+MYCN down vs NC-CTRL                       | 20.5332      | 8375.89       | 1087.79   | 1        |
| 740 | TNFAIP8       | TNFAIP8       | 0.00596315         | 0.00384105                   | 0.614669                         | -1.62689                          | NC+MYCN down vs NC-CTRL                       | 9.05368      | 1.15659       | 0.340661  | 1        |
| 741 | CABLES2       | CABLES2       | 6.16E-05           | 0.000231418                  | 0.614699                         | -1.62681                          | NC+MYCN down vs NC-CTRL                       | 34.7563      | 60.9107       | 4.67335   | 1        |
| 742 | ZNF345        | ZNF345        | 0.00961399         | 0.00211387                   | 0.614758                         | -1.62666                          | NC+MYCN down vs NC-CTRL                       | 7.6959       | 0.850512      | 0.294706  | 1        |
| 743 | TYRO3         | TYRO3         | 0.00115538         | 0.0020292                    | 0.614892                         | -1.6263                           | NC+MYCN down vs NC-CTRL                       | 15.1626      | 22.1622       | 3.89769   | 1        |
| 744 | SLC9A1        | SLC9A1        | 0.001032           | 0.00369679                   | 0.615236                         | -1.62539                          | NC+MYCN down vs NC-CTRL                       | 15.682       | 29.0372       | 4.93768   | 1        |
| 745 | CTNNB1        | CTNNB1        | 0.00622201         | 0.00527013                   | 0.61639                          | -1.62235                          | NC+MYCN down vs NC-CTRL                       | 8.92626      | 1749.93       | 522.781   | 1        |
| 746 | CENPF         | CENPF         | 0.00329342         | 0.00104407                   | 0.61668                          | -1.62159                          | NC+MYCN down vs NC-CTRL                       | 10.9819      | 1224.65       | 297.375   | 1        |
| 747 | DSTNP2        | DSTNP2        | 0.0145075          | 0.00537685                   | 0.616923                         | -1.62095                          | NC+MYCN down vs NC-CTRL                       | 6.64821      | 3.39834       | 1.36311   | 1        |
| 748 | KIF18A        | KIF18A        | 7.39E-07           | 8.12E-07                     | 0.617027                         | -1.62068                          | NC+MYCN down vs NC-CTRL                       | 110.995      | 71.8981       | 1.72736   | 1        |
| 749 | CORO1B        | CORO1B        | 0.000940451        | 0.00199315                   | 0.617113                         | -1.62045                          | NC+MYCN down vs NC-CTRL                       | 16.1203      | 165.591       | 27.3925   | 1        |
| 750 | TTK           | TTK           | 0.000789174        | 0.000296272                  | 0.617181                         | -1.62027                          | NC+MYCN down vs NC-CTRL                       | 16.976       | 176.971       | 27.7993   | 1        |
| 751 | SSBP2         | SSBP2         | 0.000436891        | 0.00309652                   | 0.617422                         | -1.61964                          | NC+MYCN down vs NC-CTRL                       | 20.1534      | 69.5339       | 9.20062   | 1        |
| 752 | ULK1          | ULK1          | 0.00457693         | 0.00812329                   | 0.617581                         | -1.61922                          | NC+MYCN down vs NC-CTRL                       | 9.87797      | 46.1707       | 12.4643   | 1        |
| 753 | CCNB1         | CCNB1         | 0.000448357        | 0.000571207                  | 0.618044                         | -1.61801                          | NC+MYCN down vs NC-CTRL                       | 20.0041      | 3163.18       | 421.671   | 1        |
| 754 | CCDC22        | CCDC22        | 0.007059           | 0.0016394                    | 0.618131                         | -1.61778                          | NC+MYCN down vs NC-CTRL                       | 8.55563      | 4.79121       | 1.49335   | 1        |
| 755 | RIMKLB        | RIMKLB        | 0.00520467         | 0.0058696                    | 0.618238                         | -1.6175                           | NC+MYCN down vs NC-CTRL                       | 9.47076      | 196.368       | 55.2911   | 1        |
| 756 | SPRED1        | SPRED1        | 0.0043015          | 0.00297548                   | 0.618449                         | -1.61695                          | NC+MYCN down vs NC-CTRL                       | 10.0793      | 28.2993       | 7.4871    | 1        |
| 757 | CLSPN         | CLSPN         | 0.00980188         | 0.00537699                   | 0.619302                         | -1.61472                          | NC+MYCN down vs NC-CTRL                       | 7.64419      | 37.3034       | 13.0132   | 1        |
| 758 | RBM23         | RBM23         | 0.000659949        | 0.000216148                  | 0.619413                         | -1.61443                          | NC+MYCN down vs NC-CTRL                       | 17.888       | 48.7533       | 7.26794   | 1        |
| 759 | RBM4B         | RBM4B         | 0.000950544        | 0.000278639                  | 0.619751                         | -1.61355                          | NC+MYCN down vs NC-CTRL                       | 16.0694      | 31.4535       | 5.21961   | 1        |
| 760 | TSPAN17       | TSPAN17       | 0.000204372        | 0.00384317                   | 0.620084                         | -1.61268                          | NC+MYCN down vs NC-CTRL                       | 24.9885      | 29.1592       | 3.11175   | 1        |
| 761 | ZNF718        | ZNF718        | 0.000185225        | 0.00527126                   | 0.620308                         | -1.6121                           | NC+MYCN down vs NC-CTRL                       | 25.6843      | 19.3409       | 2.00806   | 1        |
| 762 | TTC28         | TTC28         | 0.0139908          | 0.00910346                   | 0.620977                         | -1.61037                          | NC+MYCN down vs NC-CTRL                       | 6.73634      | 65.6731       | 25.9975   | 1        |
| 763 | MFGE8         | MFGE8         | 0.000671431        | 0.00379284                   | 0.621057                         | -1.61016                          | NC+MYCN down vs NC-CTRL                       | 17.7982      | 265.409       | 39.7656   | 1        |
| 764 | HMG1P36       | HMG1P36       | 0.000299872        | 0.00227619                   | 0.621081                         | -1.6101                           | NC+MYCN down vs NC-CTRL                       | 22.4339      | 378.269       | 44.964    | 1        |
| 765 | C5orf54       | C5orf54       | 0.00385347         | 0.00573545                   | 0.621111                         | -1.61002                          | NC+MYCN down vs NC-CTRL                       | 10.4438      | 9.87852       | 2.52232   | 1        |
| 766 | FBXL19        | FBXL19        | 0.000621543        | 0.00040782                   | 0.621298                         | -1.60953                          | NC+MYCN down vs NC-CTRL                       | 18.203       | 173.346       | 25.3945   | 1        |
| 767 | CD276         | CD276         | 0.000627222        | 0.000113153                  | 0.621662                         | -1.60859                          | NC+MYCN down vs NC-CTRL                       | 18.1549      | 180.477       | 26.5092   | 1        |
| 768 | PRKAR1AP      | PRKAR1AP      | 0.00212029         | 0.00398337                   | 0.621858                         | -1.60808                          | NC+MYCN down vs NC-CTRL                       | 12.6077      | 0.0914627     | 0.0193453 | 1        |
| 769 | LRRC42        | LRRC42        | 0.00497298         | 0.00595252                   | 0.621868                         | -1.60806                          | NC+MYCN down vs NC-CTRL                       | 9.61355      | 123.714       | 34.3166   | 1        |
| 770 | ODF2L         | ODF2L         | 0.000146823        | 0.000508856                  | 0.62212                          | -1.60741                          | NC+MYCN down vs NC-CTRL                       | 27.3973      | 47.0514       | 4.57966   | 1        |
| 771 | ZFYVE16       | ZFYVE16       | 8.00E-05           | 4.46E-05                     | 0.622192                         | -1.60722                          | NC+MYCN down vs NC-CTRL                       | 32.3682      | 36.0457       | 2.96964   | 1        |
| 772 | CHST14        | CHST14        | 1.74E-05           | 0.000167603                  | 0.622239                         | -1.6071                           | NC+MYCN down vs NC-CTRL                       | 48.7936      | 96.7424       | 5.28716   | 1        |
| 773 | ZFP30         | ZFP30         | 0.000256904        | 0.000149461                  | 0.622375                         | -1.60675                          | NC+MYCN down vs NC-CTRL                       | 23.435       | 3.97999       | 0.452883  | 1        |
| 774 | FAM178A       | FAM178A       | 0.0148296          | 0.00780624                   | 0.622517                         | -1.60638                          | NC+MYCN down vs NC-CTRL                       | 6.59522      | 38.0724       | 15.3939   | 1        |

|     | Probeset ID   | Gene Symbol   | p-value(Attribute) | p-value(NC+MYCN vs. NC-CTRL) | MeanRatio(NC+MYCN N vs. NC-CTRL) | FoldChange(NC+MYCN N vs. NC-CTRL) | FoldChange(NC+MYCN vs. NC-CTRL) (Description) | F(Attribute) | SS(Attribute) | SS(Error) | F(Error) |
|-----|---------------|---------------|--------------------|------------------------------|----------------------------------|-----------------------------------|-----------------------------------------------|--------------|---------------|-----------|----------|
| 775 | CAPNS1        | CAPNS1        | 0.00441118         | 0.00158558                   | 0.622938                         | -1.6053                           | NC+MYCN down vs NC-CTRL                       | 9.99725      | 612.605       | 163.406   | 1        |
| 776 | PLAG1         | PLAG1         | 4.67E-05           | 0.0040484                    | 0.623101                         | -1.60488                          | NC+MYCN down vs NC-CTRL                       | 37.4647      | 95.1168       | 6.77024   | 1        |
| 777 | TONSL         | TONSL         | 0.0219529          | 0.00546938                   | 0.623172                         | -1.60469                          | NC+MYCN down vs NC-CTRL                       | 5.69548      | 28.1414       | 13.176    | 1        |
| 778 | HAU55         | HAU55         | 0.00486001         | 0.00282774                   | 0.623387                         | -1.60414                          | NC+MYCN down vs NC-CTRL                       | 9.68622      | 40.914        | 11.2638   | 1        |
| 779 | MAP2K6        | MAP2K6        | 0.000490616        | 0.000111748                  | 0.623964                         | -1.60266                          | NC+MYCN down vs NC-CTRL                       | 19.4927      | 4.54478       | 0.621742  | 1        |
| 780 | SLC38A2       | SLC38A2       | 0.0145809          | 0.00607119                   | 0.624366                         | -1.60162                          | NC+MYCN down vs NC-CTRL                       | 6.63601      | 391.504       | 157.325   | 1        |
| 781 | CTD-2336O2.1  | CTD-2336O2.1  | 0.0109404          | 0.00217328                   | 0.624409                         | -1.60151                          | NC+MYCN down vs NC-CTRL                       | 7.35526      | 8.79413       | 3.18833   | 1        |
| 782 | MAP7D1        | MAP7D1        | 0.000158998        | 0.000171585                  | 0.624635                         | -1.60093                          | NC+MYCN down vs NC-CTRL                       | 26.7988      | 418.85        | 41.6786   | 1        |
| 783 | NCKAP5L       | NCKAP5L       | 0.00772923         | 0.00151203                   | 0.624791                         | -1.60054                          | NC+MYCN down vs NC-CTRL                       | 8.29633      | 13.4109       | 4.31063   | 1        |
| 784 | TOB2          | TOB2          | 0.000992227        | 0.00564722                   | 0.624877                         | -1.60031                          | NC+MYCN down vs NC-CTRL                       | 15.8662      | 258.335       | 43.4188   | 1        |
| 785 | TMEM116       | TMEM116       | 0.00784637         | 0.00484472                   | 0.625211                         | -1.59946                          | NC+MYCN down vs NC-CTRL                       | 8.2539       | 1.13761       | 0.367538  | 1        |
| 786 | RAP2C         | RAP2C         | 0.000815374        | 0.00461222                   | 0.625315                         | -1.59919                          | NC+MYCN down vs NC-CTRL                       | 16.8138      | 425.563       | 67.4942   | 1        |
| 787 | NFE2L1        | NFE2L1        | 0.000163122        | 0.0048119                    | 0.625406                         | -1.59896                          | NC+MYCN down vs NC-CTRL                       | 26.6089      | 880.439       | 88.2351   | 1        |
| 788 | PPP4R1        | PPP4R1        | 0.00015497         | 0.000198961                  | 0.625558                         | -1.59857                          | NC+MYCN down vs NC-CTRL                       | 26.9903      | 90.5088       | 8.94237   | 1        |
| 789 | SNX33         | SNX33         | 0.000761057        | 0.00120444                   | 0.625682                         | -1.59826                          | NC+MYCN down vs NC-CTRL                       | 17.1578      | 24.9602       | 3.87933   | 1        |
| 790 | KCTD10        | KCTD10        | 0.00297539         | 0.00102852                   | 0.626308                         | -1.59666                          | NC+MYCN down vs NC-CTRL                       | 11.3412      | 25.9755       | 6.10767   | 1        |
| 791 | TUBA1B        | TUBA1B        | 0.00109439         | 0.000717735                  | 0.627125                         | -1.59458                          | NC+MYCN down vs NC-CTRL                       | 15.4102      | 69454         | 12018.7   | 1        |
| 792 | WDR62         | WDR62         | 0.00113875         | 0.000301024                  | 0.627512                         | -1.5936                           | NC+MYCN down vs NC-CTRL                       | 15.2285      | 7.31805       | 1.28147   | 1        |
| 793 | NUSAP1        | NUSAP1        | 0.000112384        | 4.78E-05                     | 0.627561                         | -1.59347                          | NC+MYCN down vs NC-CTRL                       | 29.495       | 2478.9        | 224.119   | 1        |
| 794 | MLF1          | MLF1          | 0.0202732          | 0.00315534                   | 0.627776                         | -1.59292                          | NC+MYCN down vs NC-CTRL                       | 5.8711       | 3.74257       | 1.69988   | 1        |
| 795 | TINF2         | TINF2         | 0.00683547         | 0.00129766                   | 0.628409                         | -1.59132                          | NC+MYCN down vs NC-CTRL                       | 8.64902      | 23.5887       | 7.27286   | 1        |
| 796 | GTPBP2        | GTPBP2        | 0.00527158         | 0.00173705                   | 0.628668                         | -1.59066                          | NC+MYCN down vs NC-CTRL                       | 9.431        | 50.8399       | 14.3753   | 1        |
| 797 | NEIL3         | NEIL3         | 0.00364624         | 0.000819516                  | 0.628699                         | -1.59059                          | NC+MYCN down vs NC-CTRL                       | 10.6308      | 14.0774       | 3.53122   | 1        |
| 798 | AC083843.1    | AC083843.1    | 3.37E-05           | 0.000486652                  | 0.629004                         | -1.58981                          | NC+MYCN down vs NC-CTRL                       | 40.8899      | 11.193        | 0.729962  | 1        |
| 799 | ING4          | ING4          | 0.0045573          | 0.00885144                   | 0.6295                           | -1.58856                          | NC+MYCN down vs NC-CTRL                       | 9.89181      | 37.5564       | 10.1246   | 1        |
| 800 | TWSG1         | TWSG1         | 4.78E-06           | 6.54E-05                     | 0.629861                         | -1.58765                          | NC+MYCN down vs NC-CTRL                       | 68.4868      | 268.145       | 10.4408   | 1        |
| 801 | MED22         | MED22         | 0.0145504          | 0.00305696                   | 0.630288                         | -1.58658                          | NC+MYCN down vs NC-CTRL                       | 6.64108      | 14.3501       | 5.76217   | 1        |
| 802 | ELMOD3        | ELMOD3        | 1.84E-06           | 5.71E-06                     | 0.630487                         | -1.58607                          | NC+MYCN down vs NC-CTRL                       | 87.7865      | 7.21329       | 0.219116  | 1        |
| 803 | ZNF569        | ZNF569        | 0.0186435          | 0.00945778                   | 0.630488                         | -1.58607                          | NC+MYCN down vs NC-CTRL                       | 6.05976      | 3.97544       | 1.74944   | 1        |
| 804 | CTTNBP2NL     | CTTNBP2NL     | 7.04E-06           | 4.00E-06                     | 0.630854                         | -1.58515                          | NC+MYCN down vs NC-CTRL                       | 61.9071      | 17.6341       | 0.759594  | 1        |
| 805 | KIAA1731      | KIAA1731      | 0.00102645         | 0.000605047                  | 0.631129                         | -1.58446                          | NC+MYCN down vs NC-CTRL                       | 15.7072      | 29.1219       | 4.94414   | 1        |
| 806 | FZD2          | FZD2          | 0.0027124          | 0.0103444                    | 0.631381                         | -1.58383                          | NC+MYCN down vs NC-CTRL                       | 11.6765      | 445.022       | 101.633   | 1        |
| 807 | ZNF577        | ZNF577        | 0.000515106        | 0.00192186                   | 0.631445                         | -1.58367                          | NC+MYCN down vs NC-CTRL                       | 19.2208      | 4.13004       | 0.572995  | 1        |
| 808 | FAM160A2      | FAM160A2      | 0.0171188          | 0.00628677                   | 0.631607                         | -1.58326                          | NC+MYCN down vs NC-CTRL                       | 6.25585      | 9.40498       | 4.00904   | 1        |
| 809 | MYL12A        | MYL12A        | 0.00175823         | 0.0105975                    | 0.631985                         | -1.58232                          | NC+MYCN down vs NC-CTRL                       | 13.3549      | 1375.54       | 274.664   | 1        |
| 810 | GALC          | GALC          | 0.00564746         | 0.000845439                  | 0.632006                         | -1.58226                          | NC+MYCN down vs NC-CTRL                       | 9.21875      | 4.87484       | 1.41012   | 1        |
| 811 | ZNF449        | ZNF449        | 8.96E-06           | 0.000102835                  | 0.632261                         | -1.58163                          | NC+MYCN down vs NC-CTRL                       | 58.1088      | 26.4215       | 1.21251   | 1        |
| 812 | BCAR1         | BCAR1         | 0.0113495          | 0.00882324                   | 0.63267                          | -1.5806                           | NC+MYCN down vs NC-CTRL                       | 7.26047      | 15.9706       | 5.86578   | 1        |
| 813 | CHCHD5        | CHCHD5        | 0.00730797         | 0.00117257                   | 0.633063                         | -1.57962                          | NC+MYCN down vs NC-CTRL                       | 8.45585      | 0.644595      | 0.203282  | 1        |
| 814 | DZIP3         | DZIP3         | 0.00176312         | 0.00401486                   | 0.633111                         | -1.5795                           | NC+MYCN down vs NC-CTRL                       | 13.3435      | 131.199       | 26.2198   | 1        |
| 815 | CEP55         | CEP55         | 0.0140349          | 0.00948962                   | 0.633364                         | -1.57887                          | NC+MYCN down vs NC-CTRL                       | 6.72867      | 147.564       | 58.4817   | 1        |
| 816 | ACAT2         | ACAT2         | 0.000339556        | 0.00710038                   | 0.633445                         | -1.57867                          | NC+MYCN down vs NC-CTRL                       | 21.6569      | 3183.17       | 391.951   | 1        |
| 817 | CTD-3065J16.9 | CTD-3065J16.9 | 0.0202235          | 0.00303996                   | 0.633578                         | -1.57834                          | NC+MYCN down vs NC-CTRL                       | 5.87658      | 0.383881      | 0.174197  | 1        |

|     | Probeset ID   | Gene Symbol   | p-value(Attribute) | p-value(NC+MYCN vs. NC-CTRL) | MeanRatio(NC+MYCN N vs. NC-CTRL) | FoldChange(NC+MYCN N vs. NC-CTRL) | FoldChange(NC+MYCN vs. NC-CTRL) (Description) | F(Attribute) | SS(Attribute) | SS(Error) | F(Error) |
|-----|---------------|---------------|--------------------|------------------------------|----------------------------------|-----------------------------------|-----------------------------------------------|--------------|---------------|-----------|----------|
| 818 | RBM5          | RBM5          | 0.000113781        | 0.00145424                   | 0.633754                         | -1.5779                           | NC+MYCN down vs NC-CTRL                       | 29.395       | 945.208       | 85.7479   | 1        |
| 819 | ZNF473        | ZNF473        | 5.88E-05           | 0.000940649                  | 0.634016                         | -1.57725                          | NC+MYCN down vs NC-CTRL                       | 35.192       | 13.0333       | 0.987592  | 1        |
| 820 | ZDHC20        | ZDHC20        | 0.00410146         | 0.0106598                    | 0.634783                         | -1.57534                          | NC+MYCN down vs NC-CTRL                       | 10.2359      | 129.061       | 33.623    | 1        |
| 821 | HIP1          | HIP1          | 0.000634721        | 0.00266883                   | 0.634805                         | -1.57529                          | NC+MYCN down vs NC-CTRL                       | 18.0922      | 317.467       | 46.7925   | 1        |
| 822 | PLK1          | PLK1          | 0.022865           | 0.00821101                   | 0.635198                         | -1.57431                          | NC+MYCN down vs NC-CTRL                       | 5.60698      | 284.205       | 135.167   | 1        |
| 823 | NAB2          | NAB2          | 0.000334139        | 0.00145883                   | 0.635792                         | -1.57284                          | NC+MYCN down vs NC-CTRL                       | 21.7561      | 163.918       | 20.0916   | 1        |
| 824 | EXOC7         | EXOC7         | 0.0100369          | 0.0108901                    | 0.635845                         | -1.57271                          | NC+MYCN down vs NC-CTRL                       | 7.58123      | 64.0893       | 22.5431   | 1        |
| 825 | ARHGAP28      | ARHGAP28      | 8.83E-06           | 0.000900769                  | 0.636219                         | -1.57179                          | NC+MYCN down vs NC-CTRL                       | 58.333       | 546.501       | 24.9831   | 1        |
| 826 | ZSCAN20       | ZSCAN20       | 0.00443387         | 0.00958166                   | 0.636277                         | -1.57164                          | NC+MYCN down vs NC-CTRL                       | 9.98059      | 1.78          | 0.475589  | 1        |
| 827 | MSRB2         | MSRB2         | 0.00961357         | 0.00309506                   | 0.636701                         | -1.5706                           | NC+MYCN down vs NC-CTRL                       | 7.69602      | 22.4413       | 7.77588   | 1        |
| 828 | NAGK          | NAGK          | 0.00220296         | 0.00109184                   | 0.637006                         | -1.56984                          | NC+MYCN down vs NC-CTRL                       | 12.4593      | 3.94096       | 0.843484  | 1        |
| 829 | TSPYL2        | TSPYL2        | 0.000778396        | 0.0046124                    | 0.637098                         | -1.56962                          | NC+MYCN down vs NC-CTRL                       | 17.0447      | 101.481       | 15.8768   | 1        |
| 830 | SLC35B2       | SLC35B2       | 0.00210691         | 0.00239714                   | 0.637183                         | -1.56941                          | NC+MYCN down vs NC-CTRL                       | 12.6324      | 390.13        | 82.3552   | 1        |
| 831 | RAB1B         | RAB1B         | 0.00010546         | 6.34E-05                     | 0.63721                          | -1.56934                          | NC+MYCN down vs NC-CTRL                       | 30.0151      | 977.298       | 86.8274   | 1        |
| 832 | NMNAT1        | NMNAT1        | 0.000226779        | 0.0028698                    | 0.637277                         | -1.56918                          | NC+MYCN down vs NC-CTRL                       | 24.271       | 4.5015        | 0.494582  | 1        |
| 833 | INTS3         | INTS3         | 0.0226616          | 0.00940294                   | 0.637305                         | -1.56911                          | NC+MYCN down vs NC-CTRL                       | 5.62632      | 90.0859       | 42.6974   | 1        |
| 834 | LINC00863     | LINC00863     | 0.0022068          | 0.00292521                   | 0.637757                         | -1.568                            | NC+MYCN down vs NC-CTRL                       | 12.4526      | 23.9236       | 5.12312   | 1        |
| 835 | KIF24         | KIF24         | 0.00159691         | 0.000451546                  | 0.637883                         | -1.56769                          | NC+MYCN down vs NC-CTRL                       | 13.7527      | 5.423         | 1.05153   | 1        |
| 836 | ZNF71         | ZNF71         | 0.00547896         | 0.00378061                   | 0.63806                          | -1.56725                          | NC+MYCN down vs NC-CTRL                       | 9.31165      | 4.41436       | 1.26418   | 1        |
| 837 | CTB-89H12.4   | CTB-89H12.4   | 0.00229447         | 0.000702681                  | 0.638375                         | -1.56648                          | NC+MYCN down vs NC-CTRL                       | 12.303       | 23.6443       | 5.12489   | 1        |
| 838 | SGOL1         | SGOL1         | 0.00144485         | 0.001727                     | 0.638797                         | -1.56544                          | NC+MYCN down vs NC-CTRL                       | 14.1765      | 44.1978       | 8.31381   | 1        |
| 839 | KIF11         | KIF11         | 0.000210729        | 9.21E-05                     | 0.639389                         | -1.56399                          | NC+MYCN down vs NC-CTRL                       | 24.7753      | 539.834       | 58.1045   | 1        |
| 840 | KIAA1524      | KIAA1524      | 0.00458023         | 0.000740714                  | 0.639792                         | -1.56301                          | NC+MYCN down vs NC-CTRL                       | 9.87565      | 49.5595       | 13.3823   | 1        |
| 841 | DTYMK         | DTYMK         | 0.012319           | 0.003111                     | 0.640049                         | -1.56238                          | NC+MYCN down vs NC-CTRL                       | 7.0519       | 58.2968       | 22.0449   | 1        |
| 842 | NISCH         | NISCH         | 0.000967766        | 0.00260403                   | 0.64016                          | -1.56211                          | NC+MYCN down vs NC-CTRL                       | 15.9841      | 311.471       | 51.9633   | 1        |
| 843 | KDM3B         | KDM3B         | 8.71E-05           | 5.33E-05                     | 0.64037                          | -1.5616                           | NC+MYCN down vs NC-CTRL                       | 31.6307      | 238.974       | 20.147    | 1        |
| 844 | RP4-739H11.4  | RP4-739H11.4  | 0.00321767         | 0.00468548                   | 0.640929                         | -1.56024                          | NC+MYCN down vs NC-CTRL                       | 11.0634      | 6.85824       | 1.65308   | 1        |
| 845 | MYBL2         | MYBL2         | 1.23E-05           | 0.00198852                   | 0.641341                         | -1.55923                          | NC+MYCN down vs NC-CTRL                       | 53.4203      | 2424.66       | 121.036   | 1        |
| 846 | ITGAE         | ITGAE         | 0.00697317         | 0.00710853                   | 0.64138                          | -1.55914                          | NC+MYCN down vs NC-CTRL                       | 8.59105      | 1.22184       | 0.379261  | 1        |
| 847 | DNAJB1        | DNAJB1        | 0.000102094        | 1.54E-05                     | 0.641649                         | -1.55849                          | NC+MYCN down vs NC-CTRL                       | 30.2835      | 146.018       | 12.8579   | 1        |
| 848 | DYNC112       | DYNC112       | 0.000104212        | 7.07E-05                     | 0.641953                         | -1.55775                          | NC+MYCN down vs NC-CTRL                       | 30.1133      | 435.805       | 38.5925   | 1        |
| 849 | ATF7          | ATF7          | 0.00944496         | 0.0013818                    | 0.642154                         | -1.55726                          | NC+MYCN down vs NC-CTRL                       | 7.74351      | 15.0865       | 5.19542   | 1        |
| 850 | CASP2         | CASP2         | 0.0050613          | 0.00927418                   | 0.642199                         | -1.55715                          | NC+MYCN down vs NC-CTRL                       | 9.55816      | 39.3393       | 10.9754   | 1        |
| 851 | UNKL          | UNKL          | 0.00139102         | 0.000442796                  | 0.642217                         | -1.55711                          | NC+MYCN down vs NC-CTRL                       | 14.3401      | 1.43722       | 0.267263  | 1        |
| 852 | ZNF714        | ZNF714        | 0.00115318         | 0.00242136                   | 0.642958                         | -1.55531                          | NC+MYCN down vs NC-CTRL                       | 15.1713      | 63.1405       | 11.0983   | 1        |
| 853 | ACP2          | ACP2          | 0.00302331         | 0.000793335                  | 0.64344                          | -1.55415                          | NC+MYCN down vs NC-CTRL                       | 11.284       | 13.6912       | 3.23555   | 1        |
| 854 | HMMR          | HMMR          | 0.00023532         | 0.000253467                  | 0.643756                         | -1.55338                          | NC+MYCN down vs NC-CTRL                       | 24.0205      | 195.353       | 21.6874   | 1        |
| 855 | SLC38A6       | SLC38A6       | 0.000312238        | 0.00341962                   | 0.643844                         | -1.55317                          | NC+MYCN down vs NC-CTRL                       | 22.1786      | 4.70077       | 0.565201  | 1        |
| 856 | CYP20A1       | CYP20A1       | 0.0047298          | 0.00595595                   | 0.643845                         | -1.55317                          | NC+MYCN down vs NC-CTRL                       | 9.77264      | 4.61842       | 1.26023   | 1        |
| 857 | RP11-378J18.3 | RP11-378J18.3 | 0.00469114         | 0.00189077                   | 0.644051                         | -1.55267                          | NC+MYCN down vs NC-CTRL                       | 9.79887      | 0.379913      | 0.10339   | 1        |
| 858 | CTNNA1        | CTNNA1        | 9.85E-06           | 8.47E-05                     | 0.644612                         | -1.55132                          | NC+MYCN down vs NC-CTRL                       | 56.6751      | 1077.14       | 50.6812   | 1        |
| 859 | ZNF670        | ZNF670        | 0.00389412         | 0.00940246                   | 0.644773                         | -1.55093                          | NC+MYCN down vs NC-CTRL                       | 10.4086      | 2.65783       | 0.680932  | 1        |
| 860 | RP11-216B9.6  | RP11-216B9.6  | 0.0118568          | 0.00640959                   | 0.645058                         | -1.55025                          | NC+MYCN down vs NC-CTRL                       | 7.14869      | 0.116756      | 0.0435533 | 1        |

|     | Probeset ID | Gene Symbol | p-value(Attribute) | p-value(NC+MYCN vs. NC-CTRL) | MeanRatio(NC+MYCN N vs. NC-CTRL) | FoldChange(NC+MYCN N vs. NC-CTRL) | FoldChange(NC+MYCN vs. NC-CTRL) (Description) | F(Attribute) | SS(Attribute) | SS(Error) | F(Error) |
|-----|-------------|-------------|--------------------|------------------------------|----------------------------------|-----------------------------------|-----------------------------------------------|--------------|---------------|-----------|----------|
| 861 | PPP4R1L     | PPP4R1L     | 0.00035448         | 0.0109227                    | 0.646051                         | -1.54787                          | NC+MYCN down vs NC-CTRL                       | 21.3936      | 5.06441       | 0.631268  | 1        |
| 862 | KIF23       | KIF23       | 0.00115247         | 0.00034425                   | 0.646358                         | -1.54713                          | NC+MYCN down vs NC-CTRL                       | 15.174       | 75.8222       | 13.3249   | 1        |
| 863 | BORA        | BORA        | 0.000854566        | 0.000467267                  | 0.646397                         | -1.54704                          | NC+MYCN down vs NC-CTRL                       | 16.583       | 34.3528       | 5.52419   | 1        |
| 864 | CENPE       | CENPE       | 0.00197431         | 0.00597737                   | 0.646431                         | -1.54696                          | NC+MYCN down vs NC-CTRL                       | 12.8883      | 471.713       | 97.6006   | 1        |
| 865 | LAPTM4A     | LAPTM4A     | 0.000539267        | 8.23E-05                     | 0.647002                         | -1.54559                          | NC+MYCN down vs NC-CTRL                       | 18.968       | 1191.22       | 167.471   | 1        |
| 866 | FASTK       | FASTK       | 0.0066608          | 0.000929411                  | 0.647223                         | -1.54506                          | NC+MYCN down vs NC-CTRL                       | 8.7247       | 30.4965       | 9.32112   | 1        |
| 867 | TADA2A      | TADA2A      | 0.000889833        | 0.000141301                  | 0.647424                         | -1.54458                          | NC+MYCN down vs NC-CTRL                       | 16.3862      | 4.12325       | 0.67101   | 1        |
| 868 | DYRK1A      | DYRK1A      | 0.00113505         | 0.000759447                  | 0.647592                         | -1.54418                          | NC+MYCN down vs NC-CTRL                       | 15.2433      | 21.8027       | 3.81416   | 1        |
| 869 | TOR2A       | TOR2A       | 0.00248867         | 0.00838989                   | 0.647709                         | -1.5439                           | NC+MYCN down vs NC-CTRL                       | 11.9956      | 13.995        | 3.11116   | 1        |
| 870 | PGBD1       | PGBD1       | 0.0200418          | 0.0034848                    | 0.647818                         | -1.54364                          | NC+MYCN down vs NC-CTRL                       | 5.89671      | 7.64938       | 3.45927   | 1        |
| 871 | ZFP14       | ZFP14       | 0.0174913          | 0.00498784                   | 0.648091                         | -1.54299                          | NC+MYCN down vs NC-CTRL                       | 6.20599      | 4.59216       | 1.97321   | 1        |
| 872 | BTBD10      | BTBD10      | 0.00233776         | 0.00101179                   | 0.648526                         | -1.54196                          | NC+MYCN down vs NC-CTRL                       | 12.2317      | 17.431        | 3.80018   | 1        |
| 873 | CCDC93      | CCDC93      | 2.30E-05           | 6.96E-05                     | 0.648915                         | -1.54103                          | NC+MYCN down vs NC-CTRL                       | 45.3134      | 62.3091       | 3.66685   | 1        |
| 874 | FBXL7       | FBXL7       | 0.0108161          | 0.00583863                   | 0.649025                         | -1.54077                          | NC+MYCN down vs NC-CTRL                       | 7.38495      | 42.7022       | 15.4195   | 1        |
| 875 | TBC1D13     | TBC1D13     | 0.0131712          | 0.00557649                   | 0.649055                         | -1.5407                           | NC+MYCN down vs NC-CTRL                       | 6.8848       | 22.1522       | 8.58014   | 1        |
| 876 | CROT        | CROT        | 3.20E-05           | 2.06E-05                     | 0.649087                         | -1.54063                          | NC+MYCN down vs NC-CTRL                       | 41.4787      | 2.32536       | 0.149498  | 1        |
| 877 | PRDM10      | PRDM10      | 0.0057692          | 0.00624557                   | 0.649628                         | -1.53934                          | NC+MYCN down vs NC-CTRL                       | 9.15376      | 11.3171       | 3.29688   | 1        |
| 878 | SLC9A8      | SLC9A8      | 0.0060177          | 0.0020763                    | 0.649712                         | -1.53914                          | NC+MYCN down vs NC-CTRL                       | 9.02626      | 2.9605        | 0.874632  | 1        |
| 879 | IP6K2       | IP6K2       | 0.00338626         | 0.00641058                   | 0.650055                         | -1.53833                          | NC+MYCN down vs NC-CTRL                       | 10.8851      | 316.973       | 77.653    | 1        |
| 880 | NREP        | NREP        | 6.09E-05           | 0.000175271                  | 0.650058                         | -1.53832                          | NC+MYCN down vs NC-CTRL                       | 34.8642      | 1935.29       | 148.025   | 1        |
| 881 | EPC1        | EPC1        | 0.00705786         | 0.00201656                   | 0.65032                          | -1.5377                           | NC+MYCN down vs NC-CTRL                       | 8.5561       | 3.69766       | 1.15245   | 1        |
| 882 | GFER        | GFER        | 0.0171273          | 0.00346963                   | 0.65127                          | -1.53546                          | NC+MYCN down vs NC-CTRL                       | 6.25471      | 16.8382       | 7.17889   | 1        |
| 883 | SCAF1       | SCAF1       | 0.00252139         | 0.000833554                  | 0.651418                         | -1.53511                          | NC+MYCN down vs NC-CTRL                       | 11.9467      | 94.1972       | 21.0261   | 1        |
| 884 | MESDC2      | MESDC2      | 0.00234563         | 0.00208124                   | 0.651602                         | -1.53468                          | NC+MYCN down vs NC-CTRL                       | 12.2189      | 60.3126       | 13.1627   | 1        |
| 885 | CCNJL       | CCNJL       | 0.000984131        | 0.000863638                  | 0.651771                         | -1.53428                          | NC+MYCN down vs NC-CTRL                       | 15.9048      | 10.7321       | 1.79938   | 1        |
| 886 | DEPDC1      | DEPDC1      | 0.00803479         | 0.00174451                   | 0.651995                         | -1.53375                          | NC+MYCN down vs NC-CTRL                       | 8.18726      | 73.2359       | 23.8536   | 1        |
| 887 | MKI67       | MKI67       | 0.0197396          | 0.00830963                   | 0.652431                         | -1.53273                          | NC+MYCN down vs NC-CTRL                       | 5.93073      | 1362.52       | 612.637   | 1        |
| 888 | DOCK1       | DOCK1       | 8.93E-05           | 0.000672731                  | 0.652874                         | -1.53169                          | NC+MYCN down vs NC-CTRL                       | 31.4145      | 382.3         | 32.4521   | 1        |
| 889 | INO80E      | INO80E      | 0.000751507        | 0.00128772                   | 0.653274                         | -1.53075                          | NC+MYCN down vs NC-CTRL                       | 17.2214      | 31.3366       | 4.85234   | 1        |
| 890 | MYH10       | MYH10       | 0.000244637        | 0.00183701                   | 0.65389                          | -1.52931                          | NC+MYCN down vs NC-CTRL                       | 23.7598      | 4777.52       | 536.201   | 1        |
| 891 | PLEKHA4     | PLEKHA4     | 1.19E-05           | 0.00122528                   | 0.654148                         | -1.52871                          | NC+MYCN down vs NC-CTRL                       | 53.9022      | 267.13        | 13.2156   | 1        |
| 892 | RASA2       | RASA2       | 0.00153469         | 0.00101899                   | 0.654185                         | -1.52862                          | NC+MYCN down vs NC-CTRL                       | 13.9197      | 16.6787       | 3.19521   | 1        |
| 893 | KIF14       | KIF14       | 0.0239471          | 0.0045111                    | 0.654201                         | -1.52858                          | NC+MYCN down vs NC-CTRL                       | 5.50751      | 51.2876       | 24.8328   | 1        |
| 894 | FGD1        | FGD1        | 0.00343264         | 0.00716638                   | 0.654261                         | -1.52844                          | NC+MYCN down vs NC-CTRL                       | 10.838       | 147.547       | 36.3037   | 1        |
| 895 | IFT46       | IFT46       | 0.00203404         | 0.000540698                  | 0.654334                         | -1.52827                          | NC+MYCN down vs NC-CTRL                       | 12.7704      | 6.08794       | 1.27126   | 1        |
| 896 | SDCBP       | SDCBP       | 0.00122656         | 0.00448607                   | 0.654763                         | -1.52727                          | NC+MYCN down vs NC-CTRL                       | 14.8935      | 818.96        | 146.634   | 1        |
| 897 | SLC38A7     | SLC38A7     | 0.00325996         | 0.00163406                   | 0.655358                         | -1.52588                          | NC+MYCN down vs NC-CTRL                       | 11.0176      | 5.31304       | 1.28595   | 1        |
| 898 | APBB1       | APBB1       | 0.00230656         | 0.00385421                   | 0.655525                         | -1.52549                          | NC+MYCN down vs NC-CTRL                       | 12.2829      | 83.8854       | 18.2118   | 1        |
| 899 | TPX2        | TPX2        | 0.00060614         | 0.000131092                  | 0.65591                          | -1.5246                           | NC+MYCN down vs NC-CTRL                       | 18.3362      | 1812.78       | 263.636   | 1        |
| 900 | RAD21       | RAD21       | 0.0204482          | 0.00337059                   | 0.656298                         | -1.5237                           | NC+MYCN down vs NC-CTRL                       | 5.85197      | 647.861       | 295.222   | 1        |
| 901 | TUBBP2      | TUBBP2      | 0.00954667         | 0.00633478                   | 0.656483                         | -1.52327                          | NC+MYCN down vs NC-CTRL                       | 7.71474      | 18878.7       | 6525.57   | 1        |
| 902 | ZNF615      | ZNF615      | 0.000336403        | 0.000267042                  | 0.656598                         | -1.523                            | NC+MYCN down vs NC-CTRL                       | 21.7144      | 3.34777       | 0.411127  | 1        |
| 903 | RGMA        | RGMA        | 6.96E-05           | 0.00487843                   | 0.656947                         | -1.52219                          | NC+MYCN down vs NC-CTRL                       | 33.6246      | 38.8372       | 3.08006   | 1        |



|     | Probeset ID   | Gene Symbol   | p-value(Attribute) | p-value(NC+MYCN vs. NC-CTRL) | MeanRatio(NC+MYCN N vs. NC-CTRL) | FoldChange(NC+MYCN N vs. NC-CTRL) | FoldChange(NC+MYCN vs. NC-CTRL) (Description) | F(Attribute) | SS(Attribute) | SS(Error) | F(Error) |
|-----|---------------|---------------|--------------------|------------------------------|----------------------------------|-----------------------------------|-----------------------------------------------|--------------|---------------|-----------|----------|
| 904 | CEP250        | CEP250        | 0.00183543         | 0.00513101                   | 0.657247                         | -1.5215                           | NC+MYCN down vs NC-CTRL                       | 13.1803      | 59.5904       | 12.0564   | 1        |
| 905 | TSPY26P       | TSPY26P       | 5.99E-06           | 4.67E-05                     | 0.657858                         | -1.52009                          | NC+MYCN down vs NC-CTRL                       | 64.5867      | 9.18179       | 0.379099  | 1        |
| 906 | MSANTD2       | MSANTD2       | 0.00853005         | 0.00449203                   | 0.657869                         | -1.52006                          | NC+MYCN down vs NC-CTRL                       | 8.02104      | 44.5001       | 14.7944   | 1        |
| 907 | CCDC18        | CCDC18        | 9.19E-05           | 0.000678292                  | 0.65793                          | -1.51992                          | NC+MYCN down vs NC-CTRL                       | 31.1677      | 44.8051       | 3.83347   | 1        |
| 908 | ZBTB45        | ZBTB45        | 0.00685344         | 0.004907                     | 0.658217                         | -1.51926                          | NC+MYCN down vs NC-CTRL                       | 8.64138      | 7.32778       | 2.2613    | 1        |
| 909 | IDH1          | IDH1          | 4.78E-05           | 0.000742462                  | 0.658819                         | -1.51787                          | NC+MYCN down vs NC-CTRL                       | 37.2234      | 1765.91       | 126.509   | 1        |
| 910 | ZSCAN9        | ZSCAN9        | 0.00805305         | 0.00516355                   | 0.658825                         | -1.51785                          | NC+MYCN down vs NC-CTRL                       | 8.18091      | 12.456        | 4.06019   | 1        |
| 911 | ZSCAN16-AS1   | ZSCAN16-AS1   | 0.00317817         | 0.00895729                   | 0.659844                         | -1.51551                          | NC+MYCN down vs NC-CTRL                       | 11.1069      | 4.08514       | 0.980809  | 1        |
| 912 | RP11-235E17.6 | RP11-235E17.6 | 0.00107726         | 0.0106163                    | 0.660035                         | -1.51507                          | NC+MYCN down vs NC-CTRL                       | 15.4829      | 3.02572       | 0.52113   | 1        |
| 913 | TGIF1         | TGIF1         | 0.00124967         | 0.00603395                   | 0.660465                         | -1.51408                          | NC+MYCN down vs NC-CTRL                       | 14.8103      | 9.02705       | 1.62536   | 1        |
| 914 | SH3BGRL       | SH3BGRL       | 1.89E-05           | 0.000848225                  | 0.660581                         | -1.51382                          | NC+MYCN down vs NC-CTRL                       | 47.6985      | 2684.17       | 150.063   | 1        |
| 915 | PRKAR1A       | PRKAR1A       | 0.00346441         | 0.000546083                  | 0.660644                         | -1.51368                          | NC+MYCN down vs NC-CTRL                       | 10.8062      | 404.368       | 99.787    | 1        |
| 916 | NME6          | NME6          | 0.000560383        | 0.0021086                    | 0.660723                         | -1.51349                          | NC+MYCN down vs NC-CTRL                       | 18.7584      | 7.10839       | 1.01052   | 1        |
| 917 | ZFYVE1        | ZFYVE1        | 0.014374           | 0.00892338                   | 0.661169                         | -1.51247                          | NC+MYCN down vs NC-CTRL                       | 6.6706       | 4.52517       | 1.809     | 1        |
| 918 | HDAC6         | HDAC6         | 0.000479674        | 0.00331675                   | 0.661246                         | -1.5123                           | NC+MYCN down vs NC-CTRL                       | 19.6197      | 96.031        | 13.0523   | 1        |
| 919 | DNAJB2        | DNAJB2        | 0.0122966          | 0.00899561                   | 0.661308                         | -1.51215                          | NC+MYCN down vs NC-CTRL                       | 7.05649      | 12.8281       | 4.84779   | 1        |
| 920 | SMC4          | SMC4          | 0.00188681         | 0.00049126                   | 0.661953                         | -1.51068                          | NC+MYCN down vs NC-CTRL                       | 13.0691      | 833.846       | 170.14    | 1        |
| 921 | CABYR         | CABYR         | 0.00634651         | 0.00614364                   | 0.662033                         | -1.5105                           | NC+MYCN down vs NC-CTRL                       | 8.86731      | 10.2202       | 3.07353   | 1        |
| 922 | NCAPH         | NCAPH         | 0.00785987         | 0.00132478                   | 0.663134                         | -1.50799                          | NC+MYCN down vs NC-CTRL                       | 8.24905      | 132.103       | 42.7047   | 1        |
| 923 | ZNF75D        | ZNF75D        | 0.000207421        | 0.00200495                   | 0.66327                          | -1.50768                          | NC+MYCN down vs NC-CTRL                       | 24.8852      | 19.0604       | 2.04249   | 1        |
| 924 | GCC1          | GCC1          | 0.000343407        | 0.00391553                   | 0.663777                         | -1.50653                          | NC+MYCN down vs NC-CTRL                       | 21.5876      | 10.5273       | 1.30042   | 1        |
| 925 | PAF1          | PAF1          | 0.0030373          | 0.00161526                   | 0.663924                         | -1.5062                           | NC+MYCN down vs NC-CTRL                       | 11.2676      | 119.934       | 28.3845   | 1        |
| 926 | TMEM134       | TMEM134       | 0.00791444         | 0.00515319                   | 0.664476                         | -1.50494                          | NC+MYCN down vs NC-CTRL                       | 8.22959      | 6.93121       | 2.24595   | 1        |
| 927 | ZNF599        | ZNF599        | 0.00819334         | 0.00969629                   | 0.664597                         | -1.50467                          | NC+MYCN down vs NC-CTRL                       | 8.13269      | 0.78567       | 0.257617  | 1        |
| 928 | SBSPON        | SBSPON        | 0.012974           | 0.00821349                   | 0.665407                         | -1.50284                          | NC+MYCN down vs NC-CTRL                       | 6.92225      | 0.183287      | 0.0706077 | 1        |
| 929 | C16orf72      | C16orf72      | 0.0217377          | 0.00515278                   | 0.665503                         | -1.50262                          | NC+MYCN down vs NC-CTRL                       | 5.71703      | 12.9061       | 6.01997   | 1        |
| 930 | BAK1          | BAK1          | 0.00411124         | 0.00525611                   | 0.665542                         | -1.50254                          | NC+MYCN down vs NC-CTRL                       | 10.228       | 32.7078       | 8.52763   | 1        |
| 931 | RNF146        | RNF146        | 1.60E-05           | 0.000232666                  | 0.666019                         | -1.50146                          | NC+MYCN down vs NC-CTRL                       | 49.8335      | 231.031       | 12.3628   | 1        |
| 932 | DEPDC1B       | DEPDC1B       | 0.000793556        | 0.00429884                   | 0.666156                         | -1.50115                          | NC+MYCN down vs NC-CTRL                       | 16.9484      | 178.853       | 28.1407   | 1        |
| 933 | BBS4          | BBS4          | 0.0021034          | 0.00314798                   | 0.666573                         | -1.50021                          | NC+MYCN down vs NC-CTRL                       | 12.6389      | 28.1441       | 5.93808   | 1        |
| 934 | RNF149        | RNF149        | 2.74E-05           | 8.68E-05                     | 1.50053                          | 1.50053                           | NC+MYCN up vs NC-CTRL                         | 43.2202      | 29.3982       | 1.81386   | 1        |
| 935 | MRPL4         | MRPL4         | 0.00332611         | 0.00329718                   | 1.50348                          | 1.50348                           | NC+MYCN up vs NC-CTRL                         | 10.9474      | 77.6421       | 18.9127   | 1        |
| 936 | TRMT11        | TRMT11        | 0.000231621        | 0.00232364                   | 1.5047                           | 1.5047                            | NC+MYCN up vs NC-CTRL                         | 24.1275      | 108.615       | 12.0045   | 1        |
| 937 | RPL29P11      | RPL29P11      | 6.94E-05           | 0.000470041                  | 1.50504                          | 1.50504                           | NC+MYCN up vs NC-CTRL                         | 33.6509      | 58665.5       | 4648.94   | 1        |
| 938 | RPS6          | RPS6          | 0.000149545        | 0.000921686                  | 1.50515                          | 1.50515                           | NC+MYCN up vs NC-CTRL                         | 27.2582      | 505352        | 49438.5   | 1        |
| 939 | ATP13A3       | ATP13A3       | 0.00929717         | 0.00295364                   | 1.50588                          | 1.50588                           | NC+MYCN up vs NC-CTRL                         | 7.78601      | 72.106        | 24.6959   | 1        |
| 940 | PET117        | PET117        | 3.49E-05           | 0.000612836                  | 1.5072                           | 1.5072                            | NC+MYCN up vs NC-CTRL                         | 40.5077      | 46.8487       | 3.08411   | 1        |
| 941 | DNAH14        | DNAH14        | 0.00855619         | 0.00543057                   | 1.50798                          | 1.50798                           | NC+MYCN up vs NC-CTRL                         | 8.0126       | 0.553202      | 0.184111  | 1        |
| 942 | ZCCHC7        | ZCCHC7        | 0.017178           | 0.0037746                    | 1.50839                          | 1.50839                           | NC+MYCN up vs NC-CTRL                         | 6.24784      | 12.4284       | 5.3046    | 1        |
| 943 | C1orf109      | C1orf109      | 0.0145881          | 0.0107223                    | 1.50933                          | 1.50933                           | NC+MYCN up vs NC-CTRL                         | 6.63481      | 17.8408       | 7.1706    | 1        |
| 944 | TTC19         | TTC19         | 0.000840429        | 0.00284766                   | 1.50945                          | 1.50945                           | NC+MYCN up vs NC-CTRL                         | 16.6647      | 122.11        | 19.5399   | 1        |
| 945 | MECR          | MECR          | 0.00344639         | 0.00864512                   | 1.50945                          | 1.50945                           | NC+MYCN up vs NC-CTRL                         | 10.8242      | 7.46589       | 1.83931   | 1        |
| 946 | FBXL4         | FBXL4         | 0.000340547        | 0.000225952                  | 1.51022                          | 1.51022                           | NC+MYCN up vs NC-CTRL                         | 21.639       | 8.47302       | 1.04417   | 1        |

|     | Probeset ID   | Gene Symbol   | p-value(Attribute) | p-value(NC+MYCN vs. NC-CTRL) | MeanRatio(NC+MYCN N vs. NC-CTRL) | FoldChange(NC+MYCN N vs. NC-CTRL) | FoldChange(NC+MYCN vs. NC-CTRL) (Description) | F(Attribute) | SS(Attribute) | SS(Error)  | F(Error) |
|-----|---------------|---------------|--------------------|------------------------------|----------------------------------|-----------------------------------|-----------------------------------------------|--------------|---------------|------------|----------|
| 947 | DYNC2H1       | DYNC2H1       | 0.000127005        | 0.00191552                   | 1.5105                           | 1.5105                            | NC+MYCN up vs NC-CTRL                         | 28.5179      | 43.1676       | 4.03655    | 1        |
| 948 | SNHG1         | SNHG1         | 0.000136039        | 0.000816472                  | 1.51068                          | 1.51068                           | NC+MYCN up vs NC-CTRL                         | 27.9818      | 3861.67       | 368.018    | 1        |
| 949 | RP11-342K6.1  | RP11-342K6.1  | 0.00794327         | 0.00315362                   | 1.5107                           | 1.5107                            | NC+MYCN up vs NC-CTRL                         | 8.21938      | 19.3512       | 6.27823    | 1        |
| 950 | RP11-1148L6.5 | RP11-1148L6.5 | 0.00291855         | 0.0013647                    | 1.51179                          | 1.51179                           | NC+MYCN up vs NC-CTRL                         | 11.4104      | 64.028        | 14.9636    | 1        |
| 951 | RP11-395P17.3 | RP11-395P17.3 | 0.00100341         | 0.00667378                   | 1.51265                          | 1.51265                           | NC+MYCN up vs NC-CTRL                         | 15.8135      | 12.5322       | 2.11333    | 1        |
| 952 | POLG2         | POLG2         | 0.00491905         | 0.0114359                    | 1.51268                          | 1.51268                           | NC+MYCN up vs NC-CTRL                         | 9.64798      | 26.948        | 7.44832    | 1        |
| 953 | BTF3P13       | BTF3P13       | 0.0231033          | 0.00901257                   | 1.51275                          | 1.51275                           | NC+MYCN up vs NC-CTRL                         | 5.58458      | 190.979       | 91.1934    | 1        |
| 954 | DLAT          | DLAT          | 3.88E-05           | 0.000186566                  | 1.51303                          | 1.51303                           | NC+MYCN up vs NC-CTRL                         | 39.3766      | 390.546       | 26.4486    | 1        |
| 955 | RPL11         | RPL11         | 3.43E-05           | 0.000196356                  | 1.51479                          | 1.51479                           | NC+MYCN up vs NC-CTRL                         | 40.7166      | 200297        | 13118.1    | 1        |
| 956 | RPL7          | RPL7          | 4.41E-07           | 3.92E-06                     | 1.51532                          | 1.51532                           | NC+MYCN up vs NC-CTRL                         | 126.644      | 113045        | 2380.31    | 1        |
| 957 | TRUB2         | TRUB2         | 0.00229426         | 0.00069958                   | 1.51755                          | 1.51755                           | NC+MYCN up vs NC-CTRL                         | 12.3033      | 22.7617       | 4.93344    | 1        |
| 958 | RPS25         | RPS25         | 0.00018301         | 0.000500715                  | 1.51783                          | 1.51783                           | NC+MYCN up vs NC-CTRL                         | 25.7706      | 105353        | 10901.6    | 1        |
| 959 | RRN3P1        | RRN3P1        | 0.00428099         | 0.00647918                   | 1.52006                          | 1.52006                           | NC+MYCN up vs NC-CTRL                         | 10.0949      | 6.36269       | 1.68076    | 1        |
| 960 | RP11-466H18.1 | RP11-466H18.1 | 0.0141809          | 0.003817                     | 1.52136                          | 1.52136                           | NC+MYCN up vs NC-CTRL                         | 6.70345      | 23209.5       | 9232.87    | 1        |
| 961 | FAT2          | FAT2          | 0.000428729        | 0.00681167                   | 1.52303                          | 1.52303                           | NC+MYCN up vs NC-CTRL                         | 20.2626      | 0.0521068     | 0.00685752 | 1        |
| 962 | SLC19A1       | SLC19A1       | 0.00180286         | 0.00201569                   | 1.52416                          | 1.52416                           | NC+MYCN up vs NC-CTRL                         | 13.2528      | 2.6924        | 0.541752   | 1        |
| 963 | PTDSS1        | PTDSS1        | 0.00854306         | 0.00302274                   | 1.52437                          | 1.52437                           | NC+MYCN up vs NC-CTRL                         | 8.01684      | 50.774        | 16.8891    | 1        |
| 964 | ACN9          | ACN9          | 0.00265051         | 0.00607686                   | 1.52512                          | 1.52512                           | NC+MYCN up vs NC-CTRL                         | 11.7614      | 81.7371       | 18.5322    | 1        |
| 965 | MCAT          | MCAT          | 0.0031345          | 0.0034056                    | 1.52695                          | 1.52695                           | NC+MYCN up vs NC-CTRL                         | 11.1557      | 11.2596       | 2.69149    | 1        |
| 966 | FUT4          | FUT4          | 0.000560888        | 0.00491441                   | 1.52925                          | 1.52925                           | NC+MYCN up vs NC-CTRL                         | 18.7535      | 4.13769       | 0.588362   | 1        |
| 967 | TEX2          | TEX2          | 0.000166675        | 0.0118819                    | 1.52962                          | 1.52962                           | NC+MYCN up vs NC-CTRL                         | 26.45        | 36.5201       | 3.68192    | 1        |
| 968 | RP1-278E11.3  | RP1-278E11.3  | 0.00245416         | 0.0110935                    | 1.52988                          | 1.52988                           | NC+MYCN up vs NC-CTRL                         | 12.048       | 45785.9       | 10134.1    | 1        |
| 969 | RPS10         | RPS10         | 0.000167708        | 0.00110347                   | 1.53108                          | 1.53108                           | NC+MYCN up vs NC-CTRL                         | 26.4046      | 50235.3       | 5073.38    | 1        |
| 970 | RP11-752G15.6 | RP11-752G15.6 | 0.00109927         | 0.00319803                   | 1.5344                           | 1.5344                            | NC+MYCN up vs NC-CTRL                         | 15.3898      | 4.8123        | 0.833851   | 1        |
| 971 | EEF2K         | EEF2K         | 0.000904137        | 0.00045366                   | 1.53475                          | 1.53475                           | NC+MYCN up vs NC-CTRL                         | 16.3092      | 25.5573       | 4.17879    | 1        |
| 972 | SPIRE1        | SPIRE1        | 0.0133781          | 0.00284642                   | 1.535                            | 1.535                             | NC+MYCN up vs NC-CTRL                         | 6.84626      | 19.5646       | 7.62056    | 1        |
| 973 | FAM216A       | FAM216A       | 0.00813712         | 0.00540649                   | 1.54003                          | 1.54003                           | NC+MYCN up vs NC-CTRL                         | 8.15189      | 66.0839       | 21.6175    | 1        |
| 974 | OXA1L         | OXA1L         | 0.000288929        | 0.00220038                   | 1.54028                          | 1.54028                           | NC+MYCN up vs NC-CTRL                         | 22.671       | 3350.55       | 394.107    | 1        |
| 975 | SC22CB-1E7.1  | SC22CB-1E7.1  | 0.0019996          | 0.00808908                   | 1.54047                          | 1.54047                           | NC+MYCN up vs NC-CTRL                         | 12.8378      | 3969.85       | 824.616    | 1        |
| 976 | TIMM50        | TIMM50        | 0.0132759          | 0.00443378                   | 1.54351                          | 1.54351                           | NC+MYCN up vs NC-CTRL                         | 6.86521      | 46.9423       | 18.2339    | 1        |
| 977 | AC005154.7    | AC005154.7    | 0.00035565         | 0.00496626                   | 1.54475                          | 1.54475                           | NC+MYCN up vs NC-CTRL                         | 21.3735      | 4.81208       | 0.600379   | 1        |
| 978 | NAT10         | NAT10         | 0.00672517         | 0.00395794                   | 1.5448                           | 1.5448                            | NC+MYCN up vs NC-CTRL                         | 8.69653      | 165.58        | 50.7729    | 1        |
| 979 | GNB2L1        | GNB2L1        | 0.00103375         | 0.00270918                   | 1.54613                          | 1.54613                           | NC+MYCN up vs NC-CTRL                         | 15.6741      | 50024         | 8510.7     | 1        |
| 980 | CTC-251D13.1  | CTC-251D13.1  | 0.00189464         | 0.00133073                   | 1.54631                          | 1.54631                           | NC+MYCN up vs NC-CTRL                         | 13.0525      | 0.0492444     | 0.0100608  | 1        |
| 981 | EXOSC7        | EXOSC7        | 1.40E-05           | 0.000105776                  | 1.54807                          | 1.54807                           | NC+MYCN up vs NC-CTRL                         | 51.6448      | 30.3155       | 1.56533    | 1        |
| 982 | DNAJA3        | DNAJA3        | 0.00218529         | 0.00180852                   | 1.54817                          | 1.54817                           | NC+MYCN up vs NC-CTRL                         | 12.4904      | 33.533        | 7.15917    | 1        |
| 983 | RPS18         | RPS18         | 7.87E-05           | 0.00060242                   | 1.54844                          | 1.54844                           | NC+MYCN up vs NC-CTRL                         | 32.52        | 37312.3       | 3059.64    | 1        |
| 984 | RPUSD1        | RPUSD1        | 0.00774863         | 0.00558323                   | 1.55054                          | 1.55054                           | NC+MYCN up vs NC-CTRL                         | 8.28925      | 24.1089       | 7.75586    | 1        |
| 985 | RP11-383C5.7  | RP11-383C5.7  | 0.00975517         | 0.0106279                    | 1.55151                          | 1.55151                           | NC+MYCN up vs NC-CTRL                         | 7.65693      | 0.702564      | 0.244681   | 1        |
| 986 | SERBP1P6      | SERBP1P6      | 2.65E-05           | 0.0116502                    | 1.5522                           | 1.5522                            | NC+MYCN up vs NC-CTRL                         | 43.6136      | 79.6808       | 4.87192    | 1        |
| 987 | RP4-665J23.1  | RP4-665J23.1  | 0.000524392        | 0.00953318                   | 1.55534                          | 1.55534                           | NC+MYCN up vs NC-CTRL                         | 19.1219      | 6.34712       | 0.885143   | 1        |
| 988 | PDHA1         | PDHA1         | 0.000209134        | 0.000267538                  | 1.55605                          | 1.55605                           | NC+MYCN up vs NC-CTRL                         | 24.828       | 242.133       | 26.0064    | 1        |
| 989 | MLXIP         | MLXIP         | 0.00377457         | 0.011228                     | 1.55626                          | 1.55626                           | NC+MYCN up vs NC-CTRL                         | 10.5135      | 34.5679       | 8.76787    | 1        |

|      | Probeset ID   | Gene Symbol   | p-value(Attribute) | p-value(NC+MYCN vs. NC-CTRL) | MeanRatio(NC+MYCN N vs. NC-CTRL) | FoldChange(NC+MYCN N vs. NC-CTRL) | FoldChange(NC+MYCN vs. NC-CTRL) (Description) | F(Attribute) | SS(Attribute) | SS(Error)  | F(Error) |
|------|---------------|---------------|--------------------|------------------------------|----------------------------------|-----------------------------------|-----------------------------------------------|--------------|---------------|------------|----------|
| 990  | RP11-219G10.1 | RP11-219G10.1 | 0.000110706        | 0.002638                     | 1.55923                          | 1.55923                           | NC+MYCN up vs NC-CTRL                         | 29.6173      | 180.114       | 16.217     | 1        |
| 991  | FAM86A        | FAM86A        | 0.0147244          | 0.00490357                   | 1.56264                          | 1.56264                           | NC+MYCN up vs NC-CTRL                         | 6.61238      | 20.5692       | 8.29523    | 1        |
| 992  | ACKR4         | ACKR4         | 0.00204476         | 0.0101237                    | 1.56433                          | 1.56433                           | NC+MYCN up vs NC-CTRL                         | 12.7498      | 0.144487      | 0.0302202  | 1        |
| 993  | SCAMP1        | SCAMP1        | 6.84E-05           | 2.91E-05                     | 1.56445                          | 1.56445                           | NC+MYCN up vs NC-CTRL                         | 33.7871      | 47.178        | 3.72355    | 1        |
| 994  | GLTSCR2       | GLTSCR2       | 3.58E-05           | 0.000263804                  | 1.56633                          | 1.56633                           | NC+MYCN up vs NC-CTRL                         | 40.2341      | 1725.95       | 114.394    | 1        |
| 995  | ZNF598        | ZNF598        | 0.0100526          | 0.00999256                   | 1.56633                          | 1.56633                           | NC+MYCN up vs NC-CTRL                         | 7.57709      | 68.13         | 23.9776    | 1        |
| 996  | SRPK1         | SRPK1         | 0.000331048        | 0.000239264                  | 1.56975                          | 1.56975                           | NC+MYCN up vs NC-CTRL                         | 21.8136      | 554.708       | 67.8119    | 1        |
| 997  | C20orf27      | C20orf27      | 0.0036079          | 0.0044675                    | 1.57151                          | 1.57151                           | NC+MYCN up vs NC-CTRL                         | 10.6669      | 286.2         | 71.5487    | 1        |
| 998  | CCRN4L        | CCRN4L        | 0.0119345          | 0.00301206                   | 1.57218                          | 1.57218                           | NC+MYCN up vs NC-CTRL                         | 7.13208      | 8.1701        | 3.05478    | 1        |
| 999  | SERBP1        | SERBP1        | 0.00655638         | 0.0025265                    | 1.57271                          | 1.57271                           | NC+MYCN up vs NC-CTRL                         | 8.77113      | 4501.66       | 1368.63    | 1        |
| 1000 | GFM1          | GFM1          | 0.000327043        | 0.000314019                  | 1.5728                           | 1.5728                            | NC+MYCN up vs NC-CTRL                         | 21.8891      | 23.1575       | 2.82119    | 1        |
| 1001 | GSPT1         | GSPT1         | 0.00128311         | 0.00037975                   | 1.57285                          | 1.57285                           | NC+MYCN up vs NC-CTRL                         | 14.6933      | 368.861       | 66.9441    | 1        |
| 1002 | PTDSS2        | PTDSS2        | 0.0034231          | 0.0116843                    | 1.57402                          | 1.57402                           | NC+MYCN up vs NC-CTRL                         | 10.8476      | 41.5071       | 10.2037    | 1        |
| 1003 | ZNF485        | ZNF485        | 0.00748539         | 0.00370613                   | 1.57539                          | 1.57539                           | NC+MYCN up vs NC-CTRL                         | 8.38731      | 2.85524       | 0.907798   | 1        |
| 1004 | RRP1          | RRP1          | 0.00719539         | 0.00609556                   | 1.57783                          | 1.57783                           | NC+MYCN up vs NC-CTRL                         | 8.50044      | 34.5765       | 10.847     | 1        |
| 1005 | UTP23         | UTP23         | 0.0234209          | 0.00436211                   | 1.57819                          | 1.57819                           | NC+MYCN up vs NC-CTRL                         | 5.55516      | 6.86995       | 3.29781    | 1        |
| 1006 | C18orf8       | C18orf8       | 0.0197941          | 0.00931087                   | 1.57919                          | 1.57919                           | NC+MYCN up vs NC-CTRL                         | 5.92455      | 16.0491       | 7.22376    | 1        |
| 1007 | PABPC1        | PABPC1        | 0.000495573        | 0.000366431                  | 1.57941                          | 1.57941                           | NC+MYCN up vs NC-CTRL                         | 19.4363      | 101954        | 13988.1    | 1        |
| 1008 | RPL5P17       | RPL5P17       | 0.00326852         | 0.0056488                    | 1.57963                          | 1.57963                           | NC+MYCN up vs NC-CTRL                         | 11.0084      | 103.593       | 25.0943    | 1        |
| 1009 | NPM1          | NPM1          | 0.000144156        | 0.000731379                  | 1.57982                          | 1.57982                           | NC+MYCN up vs NC-CTRL                         | 27.5367      | 191797        | 18573.7    | 1        |
| 1010 | DVL1          | DVL1          | 0.00558787         | 0.00586673                   | 1.57998                          | 1.57998                           | NC+MYCN up vs NC-CTRL                         | 9.2512       | 111.771       | 32.218     | 1        |
| 1011 | ATAD3A        | ATAD3A        | 0.00530879         | 0.00936385                   | 1.58078                          | 1.58078                           | NC+MYCN up vs NC-CTRL                         | 9.40916      | 142.829       | 40.4794    | 1        |
| 1012 | NLN           | NLN           | 0.000905891        | 0.00107866                   | 1.58103                          | 1.58103                           | NC+MYCN up vs NC-CTRL                         | 16.2999      | 77.6399       | 12.7019    | 1        |
| 1013 | SPATA25       | SPATA25       | 0.0123272          | 0.0083907                    | 1.58179                          | 1.58179                           | NC+MYCN up vs NC-CTRL                         | 7.05023      | 0.645467      | 0.24414    | 1        |
| 1014 | RPL13A        | RPL13A        | 1.94E-06           | 2.83E-05                     | 1.58271                          | 1.58271                           | NC+MYCN up vs NC-CTRL                         | 86.5273      | 614929        | 18951.4    | 1        |
| 1015 | GPAT2         | GPAT2         | 0.000295838        | 0.00662497                   | 1.58421                          | 1.58421                           | NC+MYCN up vs NC-CTRL                         | 22.52        | 0.0204488     | 0.00242141 | 1        |
| 1016 | LARS          | LARS          | 0.0074175          | 0.00221408                   | 1.58432                          | 1.58432                           | NC+MYCN up vs NC-CTRL                         | 8.41329      | 470.07        | 148.993    | 1        |
| 1017 | EIF3A         | EIF3A         | 0.000465023        | 0.000369833                  | 1.58473                          | 1.58473                           | NC+MYCN up vs NC-CTRL                         | 19.7955      | 5727.5        | 771.556    | 1        |
| 1018 | FOKK1         | FOKK1         | 0.00662277         | 0.00304074                   | 1.58602                          | 1.58602                           | NC+MYCN up vs NC-CTRL                         | 8.7415       | 8.41789       | 2.56794    | 1        |
| 1019 | ACAT1         | ACAT1         | 0.00326675         | 0.00489268                   | 1.58615                          | 1.58615                           | NC+MYCN up vs NC-CTRL                         | 11.0103      | 73.511        | 17.8042    | 1        |
| 1020 | SLC19A2       | SLC19A2       | 0.000147408        | 0.000203531                  | 1.58755                          | 1.58755                           | NC+MYCN up vs NC-CTRL                         | 27.3671      | 37.8098       | 3.6842     | 1        |
| 1021 | UBE2G2        | UBE2G2        | 6.37E-05           | 0.000107935                  | 1.58836                          | 1.58836                           | NC+MYCN up vs NC-CTRL                         | 34.4482      | 402.323       | 31.1442    | 1        |
| 1022 | RPL14P1       | RPL14P1       | 0.00916792         | 0.00611022                   | 1.5885                           | 1.5885                            | NC+MYCN up vs NC-CTRL                         | 7.82388      | 2012.9        | 686.071    | 1        |
| 1023 | GCFC2         | GCFC2         | 0.00418608         | 0.00178988                   | 1.59022                          | 1.59022                           | NC+MYCN up vs NC-CTRL                         | 10.1685      | 20.4288       | 5.35739    | 1        |
| 1024 | RP11-181K3.4  | RP11-181K3.4  | 0.00161107         | 0.00722882                   | 1.5918                           | 1.5918                            | NC+MYCN up vs NC-CTRL                         | 13.7158      | 0.426073      | 0.0828386  | 1        |
| 1025 | TMEM192       | TMEM192       | 0.0168557          | 0.00271445                   | 1.59233                          | 1.59233                           | NC+MYCN up vs NC-CTRL                         | 6.29189      | 6.94636       | 2.94405    | 1        |
| 1026 | QTRTD1        | QTRTD1        | 0.0101091          | 0.00348102                   | 1.59309                          | 1.59309                           | NC+MYCN up vs NC-CTRL                         | 7.56224      | 11.5467       | 4.07171    | 1        |
| 1027 | NPM3          | NPM3          | 0.00427948         | 0.00964109                   | 1.59483                          | 1.59483                           | NC+MYCN up vs NC-CTRL                         | 10.0961      | 716.455       | 189.236    | 1        |
| 1028 | DPH5          | DPH5          | 4.94E-05           | 0.000342521                  | 1.59508                          | 1.59508                           | NC+MYCN up vs NC-CTRL                         | 36.9049      | 434.631       | 31.4055    | 1        |
| 1029 | CAAP1         | CAAP1         | 0.00713977         | 0.00389256                   | 1.59537                          | 1.59537                           | NC+MYCN up vs NC-CTRL                         | 8.52279      | 59.6021       | 18.6487    | 1        |
| 1030 | ALDH18A1      | ALDH18A1      | 0.00774913         | 0.0101957                    | 1.59546                          | 1.59546                           | NC+MYCN up vs NC-CTRL                         | 8.28907      | 1993.23       | 641.238    | 1        |
| 1031 | DCAF13        | DCAF13        | 0.0042841          | 0.00275719                   | 1.59693                          | 1.59693                           | NC+MYCN up vs NC-CTRL                         | 10.0926      | 80.0638       | 21.1546    | 1        |
| 1032 | CTC-297N7.8   | CTC-297N7.8   | 0.0173589          | 0.00382036                   | 1.59942                          | 1.59942                           | NC+MYCN up vs NC-CTRL                         | 6.22356      | 10.4851       | 4.49264    | 1        |

|      | Probeset ID   | Gene Symbol   | p-value(Attribute) | p-value(NC+MYCN vs. NC-CTRL) | MeanRatio(NC+MYCN N vs. NC-CTRL) | FoldChange(NC+MYCN N vs. NC-CTRL) | FoldChange(NC+MYCN vs. NC-CTRL) (Description) | F(Attribute) | SS(Attribute) | SS(Error) | F(Error) |
|------|---------------|---------------|--------------------|------------------------------|----------------------------------|-----------------------------------|-----------------------------------------------|--------------|---------------|-----------|----------|
| 1033 | TXNL4A        | TXNL4A        | 0.00101655         | 0.000217138                  | 1.59995                          | 1.59995                           | NC+MYCN up vs NC-CTRL                         | 15.7525      | 68.0369       | 11.5177   | 1        |
| 1034 | CALML4        | CALML4        | 4.94E-05           | 0.000211509                  | 1.60013                          | 1.60013                           | NC+MYCN up vs NC-CTRL                         | 36.9066      | 86.8168       | 6.2729    | 1        |
| 1035 | DCAF13P3      | DCAF13P3      | 0.00266904         | 0.00176718                   | 1.60392                          | 1.60392                           | NC+MYCN up vs NC-CTRL                         | 11.7357      | 0.347698      | 0.0790059 | 1        |
| 1036 | EIF3E         | EIF3E         | 1.16E-06           | 1.06E-05                     | 1.6046                           | 1.6046                            | NC+MYCN up vs NC-CTRL                         | 98.792       | 9937.45       | 268.239   | 1        |
| 1037 | RP11-490G8.1  | RP11-490G8.1  | 0.000170199        | 0.00272999                   | 1.60687                          | 1.60687                           | NC+MYCN up vs NC-CTRL                         | 26.2966      | 5928.77       | 601.221   | 1        |
| 1038 | NABP1         | NABP1         | 4.09E-05           | 0.00101108                   | 1.60924                          | 1.60924                           | NC+MYCN up vs NC-CTRL                         | 38.8319      | 4.94938       | 0.339884  | 1        |
| 1039 | EIF5B         | EIF5B         | 0.0156191          | 0.0084088                    | 1.60941                          | 1.60941                           | NC+MYCN up vs NC-CTRL                         | 6.47122      | 578.631       | 238.443   | 1        |
| 1040 | PRDX4         | PRDX4         | 2.43E-05           | 0.000184553                  | 1.60961                          | 1.60961                           | NC+MYCN up vs NC-CTRL                         | 44.6114      | 2362.47       | 141.218   | 1        |
| 1041 | LYRM7         | LYRM7         | 0.000268669        | 0.000417555                  | 1.61248                          | 1.61248                           | NC+MYCN up vs NC-CTRL                         | 23.1411      | 53.9017       | 6.21136   | 1        |
| 1042 | TRIT1         | TRIT1         | 0.00184484         | 0.00366595                   | 1.61301                          | 1.61301                           | NC+MYCN up vs NC-CTRL                         | 13.1597      | 114.953       | 23.2939   | 1        |
| 1043 | MRPL30        | MRPL30        | 0.00199602         | 0.000802352                  | 1.6144                           | 1.6144                            | NC+MYCN up vs NC-CTRL                         | 12.8449      | 143.644       | 29.8212   | 1        |
| 1044 | PTPMT1        | PTPMT1        | 0.000984006        | 0.000521547                  | 1.61443                          | 1.61443                           | NC+MYCN up vs NC-CTRL                         | 15.9054      | 26.9558       | 4.51935   | 1        |
| 1045 | TARBP1        | TARBP1        | 5.75E-05           | 6.82E-05                     | 1.6205                           | 1.6205                            | NC+MYCN up vs NC-CTRL                         | 35.4131      | 144.732       | 10.8986   | 1        |
| 1046 | HPRT1         | HPRT1         | 0.0138287          | 0.00210071                   | 1.62227                          | 1.62227                           | NC+MYCN up vs NC-CTRL                         | 6.76482      | 188.258       | 74.2107   | 1        |
| 1047 | RBFA          | RBFA          | 0.000954754        | 0.000247776                  | 1.62301                          | 1.62301                           | NC+MYCN up vs NC-CTRL                         | 16.0484      | 23.1336       | 3.84397   | 1        |
| 1048 | PTCD3         | PTCD3         | 2.85E-05           | 3.44E-05                     | 1.62456                          | 1.62456                           | NC+MYCN up vs NC-CTRL                         | 42.7674      | 151.431       | 9.44212   | 1        |
| 1049 | PPAT          | PPAT          | 0.000284936        | 0.000224995                  | 1.62577                          | 1.62577                           | NC+MYCN up vs NC-CTRL                         | 22.7603      | 202.604       | 23.7377   | 1        |
| 1050 | PM20D2        | PM20D2        | 0.021356           | 0.00644958                   | 1.62578                          | 1.62578                           | NC+MYCN up vs NC-CTRL                         | 5.75591      | 85.1566       | 39.4524   | 1        |
| 1051 | MIR4519       | MIR4519       | 0.00041108         | 0.00116478                   | 1.62592                          | 1.62592                           | NC+MYCN up vs NC-CTRL                         | 20.508       | 4.4946        | 0.584435  | 1        |
| 1052 | RPUSD4        | RPUSD4        | 0.000102023        | 0.000216419                  | 1.62817                          | 1.62817                           | NC+MYCN up vs NC-CTRL                         | 30.2892      | 107.211       | 9.43883   | 1        |
| 1053 | FASTKD1       | FASTKD1       | 0.0144763          | 0.0022814                    | 1.62945                          | 1.62945                           | NC+MYCN up vs NC-CTRL                         | 6.65343      | 21.3294       | 8.54874   | 1        |
| 1054 | IKBKB         | IKBKB         | 0.000801364        | 0.00075605                   | 1.63059                          | 1.63059                           | NC+MYCN up vs NC-CTRL                         | 16.8997      | 13.0985       | 2.06686   | 1        |
| 1055 | SDAD1         | SDAD1         | 0.0155967          | 0.00331162                   | 1.63252                          | 1.63252                           | NC+MYCN up vs NC-CTRL                         | 6.47463      | 230.226       | 94.8218   | 1        |
| 1056 | MRPS25        | MRPS25        | 0.0016007          | 0.00106012                   | 1.63338                          | 1.63338                           | NC+MYCN up vs NC-CTRL                         | 13.7428      | 287.401       | 55.7676   | 1        |
| 1057 | POLR1D        | POLR1D        | 0.0121941          | 0.00294686                   | 1.63358                          | 1.63358                           | NC+MYCN up vs NC-CTRL                         | 7.07761      | 238.518       | 89.8677   | 1        |
| 1058 | PRR5          | PRR5          | 0.000903732        | 0.00946864                   | 1.63368                          | 1.63368                           | NC+MYCN up vs NC-CTRL                         | 16.3114      | 5.37359       | 0.878502  | 1        |
| 1059 | RP11-432J24.6 | RP11-432J24.6 | 0.000932277        | 0.00849625                   | 1.63399                          | 1.63399                           | NC+MYCN up vs NC-CTRL                         | 16.162       | 0.369298      | 0.0609326 | 1        |
| 1060 | SUPV3L1       | SUPV3L1       | 0.00194038         | 0.000345497                  | 1.6352                           | 1.6352                            | NC+MYCN up vs NC-CTRL                         | 12.9572      | 35.9895       | 7.40686   | 1        |
| 1061 | AC133528.2    | AC133528.2    | 0.00220672         | 0.00505568                   | 1.6371                           | 1.6371                            | NC+MYCN up vs NC-CTRL                         | 12.4527      | 23.6058       | 5.05502   | 1        |
| 1062 | NUDT11        | NUDT11        | 0.000671177        | 0.00387724                   | 1.6373                           | 1.6373                            | NC+MYCN up vs NC-CTRL                         | 17.8002      | 929.233       | 139.209   | 1        |
| 1063 | POLR3E        | POLR3E        | 0.00227588         | 0.00204739                   | 1.63744                          | 1.63744                           | NC+MYCN up vs NC-CTRL                         | 12.3341      | 27.8735       | 6.02632   | 1        |
| 1064 | NLE1          | NLE1          | 0.0042607          | 0.00547955                   | 1.64053                          | 1.64053                           | NC+MYCN up vs NC-CTRL                         | 10.1105      | 49.6984       | 13.1081   | 1        |
| 1065 | PSMG4         | PSMG4         | 0.0142359          | 0.00819904                   | 1.64187                          | 1.64187                           | NC+MYCN up vs NC-CTRL                         | 6.69405      | 1.47508       | 0.587618  | 1        |
| 1066 | CTD-2576F9.1  | CTD-2576F9.1  | 0.000463671        | 0.00109589                   | 1.64233                          | 1.64233                           | NC+MYCN up vs NC-CTRL                         | 19.8121      | 120.124       | 16.1685   | 1        |
| 1067 | FARSB         | FARSB         | 0.00189217         | 0.00207356                   | 1.64236                          | 1.64236                           | NC+MYCN up vs NC-CTRL                         | 13.0578      | 909.049       | 185.647   | 1        |
| 1068 | CS            | CS            | 0.00189998         | 0.000557828                  | 1.6424                           | 1.6424                            | NC+MYCN up vs NC-CTRL                         | 13.0413      | 1296.7        | 265.149   | 1        |
| 1069 | ESRRA         | ESRRA         | 0.00224797         | 0.00227935                   | 1.644                            | 1.644                             | NC+MYCN up vs NC-CTRL                         | 12.3814      | 24.5139       | 5.2797    | 1        |
| 1070 | RPL17         | RPL17         | 0.000739977        | 0.001593                     | 1.64471                          | 1.64471                           | NC+MYCN up vs NC-CTRL                         | 17.2996      | 103049        | 15884.5   | 1        |
| 1071 | C3orf33       | C3orf33       | 0.00594383         | 0.00647515                   | 1.64538                          | 1.64538                           | NC+MYCN up vs NC-CTRL                         | 9.06346      | 1.35208       | 0.397811  | 1        |
| 1072 | RP11-390G14.1 | RP11-390G14.1 | 0.000203611        | 0.00259872                   | 1.64548                          | 1.64548                           | NC+MYCN up vs NC-CTRL                         | 25.0146      | 4.70165       | 0.501217  | 1        |
| 1073 | RPL23A        | RPL23A        | 0.000456403        | 0.0015399                    | 1.64674                          | 1.64674                           | NC+MYCN up vs NC-CTRL                         | 19.9022      | 106916        | 14325.5   | 1        |
| 1074 | AC104978.1    | AC104978.1    | 2.63E-05           | 0.000530722                  | 1.64737                          | 1.64737                           | NC+MYCN up vs NC-CTRL                         | 43.7184      | 1043          | 63.6195   | 1        |
| 1075 | TXNRD3        | TXNRD3        | 5.04E-05           | 0.000475995                  | 1.64801                          | 1.64801                           | NC+MYCN up vs NC-CTRL                         | 36.7033      | 18.5778       | 1.34976   | 1        |

|      | Probeset ID    | Gene Symbol    | p-value(Attribute) | p-value(NC+MYCN vs. NC-CTRL) | MeanRatio(NC+MYCN N vs. NC-CTRL) | FoldChange(NC+MYCN N vs. NC-CTRL) | FoldChange(NC+MYCN vs. NC-CTRL) (Description) | F(Attribute) | SS(Attribute) | SS(Error) | F(Error) |
|------|----------------|----------------|--------------------|------------------------------|----------------------------------|-----------------------------------|-----------------------------------------------|--------------|---------------|-----------|----------|
| 1076 | SOWAHC         | SOWAHC         | 0.000924875        | 0.00189423                   | 1.6487                           | 1.6487                            | NC+MYCN up vs NC-CTRL                         | 16.2002      | 29.6402       | 4.87898   | 1        |
| 1077 | GP1BA          | GP1BA          | 0.000274818        | 0.00340408                   | 1.65027                          | 1.65027                           | NC+MYCN up vs NC-CTRL                         | 22.9939      | 4.1554        | 0.481913  | 1        |
| 1078 | MKRN7P         | MKRN7P         | 0.000568528        | 0.0100315                    | 1.6545                           | 1.6545                            | NC+MYCN up vs NC-CTRL                         | 18.6802      | 0.521547      | 0.0744529 | 1        |
| 1079 | CYB5R2         | CYB5R2         | 4.78E-05           | 0.00191873                   | 1.65628                          | 1.65628                           | NC+MYCN up vs NC-CTRL                         | 37.2338      | 6.74284       | 0.482918  | 1        |
| 1080 | DOCK6          | DOCK6          | 0.000104397        | 0.000476083                  | 1.65741                          | 1.65741                           | NC+MYCN up vs NC-CTRL                         | 30.0986      | 6.01588       | 0.532992  | 1        |
| 1081 | UCHL3          | UCHL3          | 0.00232983         | 0.00479386                   | 1.65816                          | 1.65816                           | NC+MYCN up vs NC-CTRL                         | 12.2446      | 127.866       | 27.8469   | 1        |
| 1082 | RPL5           | RPL5           | 8.87E-05           | 0.000167192                  | 1.66009                          | 1.66009                           | NC+MYCN up vs NC-CTRL                         | 31.4701      | 236507        | 20040.8   | 1        |
| 1083 | EIF3D          | EIF3D          | 0.00114183         | 0.00321964                   | 1.66165                          | 1.66165                           | NC+MYCN up vs NC-CTRL                         | 15.2162      | 3735.4        | 654.636   | 1        |
| 1084 | L3HYPDH        | L3HYPDH        | 0.00866478         | 0.00699645                   | 1.66452                          | 1.66452                           | NC+MYCN up vs NC-CTRL                         | 7.9779       | 5.30625       | 1.77365   | 1        |
| 1085 | CTD-2010I16.1  | CTD-2010I16.1  | 0.0067928          | 0.0113934                    | 1.66514                          | 1.66514                           | NC+MYCN up vs NC-CTRL                         | 8.66729      | 14.6591       | 4.51017   | 1        |
| 1086 | GDA            | GDA            | 3.10E-06           | 0.000314851                  | 1.66614                          | 1.66614                           | NC+MYCN up vs NC-CTRL                         | 76.6354      | 439.52        | 15.2939   | 1        |
| 1087 | MRPS30         | MRPS30         | 0.00464034         | 0.00318878                   | 1.66884                          | 1.66884                           | NC+MYCN up vs NC-CTRL                         | 9.83375      | 69.6878       | 18.8976   | 1        |
| 1088 | CAMKMT         | CAMKMT         | 0.00142314         | 0.000618235                  | 1.67269                          | 1.67269                           | NC+MYCN up vs NC-CTRL                         | 14.2416      | 5.20653       | 0.974897  | 1        |
| 1089 | NOA1           | NOA1           | 0.00446843         | 0.00304958                   | 1.67322                          | 1.67322                           | NC+MYCN up vs NC-CTRL                         | 9.95543      | 160.713       | 43.0486   | 1        |
| 1090 | FAM35A         | FAM35A         | 0.00905342         | 0.00181395                   | 1.67474                          | 1.67474                           | NC+MYCN up vs NC-CTRL                         | 7.85799      | 126.874       | 43.0555   | 1        |
| 1091 | NIP7           | NIP7           | 0.00405275         | 0.010014                     | 1.68042                          | 1.68042                           | NC+MYCN up vs NC-CTRL                         | 10.2755      | 118.302       | 30.7014   | 1        |
| 1092 | RPL4           | RPL4           | 0.000119947        | 0.000114097                  | 1.68074                          | 1.68074                           | NC+MYCN up vs NC-CTRL                         | 28.9709      | 184031        | 16939.4   | 1        |
| 1093 | HSD17B6        | HSD17B6        | 0.0155538          | 0.00843752                   | 1.68104                          | 1.68104                           | NC+MYCN up vs NC-CTRL                         | 6.48118      | 0.256536      | 0.105551  | 1        |
| 1094 | PRMT3          | PRMT3          | 0.021676           | 0.00656685                   | 1.6817                           | 1.6817                            | NC+MYCN up vs NC-CTRL                         | 5.72325      | 24.9103       | 11.6066   | 1        |
| 1095 | RPL10AP6       | RPL10AP6       | 0.000428463        | 0.000254332                  | 1.68407                          | 1.68407                           | NC+MYCN up vs NC-CTRL                         | 20.2662      | 1748.9        | 230.123   | 1        |
| 1096 | CNBP           | CNBP           | 0.00389351         | 0.000625895                  | 1.69296                          | 1.69296                           | NC+MYCN up vs NC-CTRL                         | 10.4091      | 9768.94       | 2502.66   | 1        |
| 1097 | USP45          | USP45          | 0.00279416         | 0.00323721                   | 1.69774                          | 1.69774                           | NC+MYCN up vs NC-CTRL                         | 11.5681      | 24.6128       | 5.67374   | 1        |
| 1098 | IMPDH2         | IMPDH2         | 0.000451426        | 0.00174986                   | 1.69898                          | 1.69898                           | NC+MYCN up vs NC-CTRL                         | 19.965       | 11507         | 1536.96   | 1        |
| 1099 | RP11-742N3.1   | RP11-742N3.1   | 0.00168266         | 0.00662642                   | 1.70005                          | 1.70005                           | NC+MYCN up vs NC-CTRL                         | 13.5353      | 119473        | 23538.1   | 1        |
| 1100 | RNASET2        | RNASET2        | 0.015102           | 0.00469888                   | 1.70051                          | 1.70051                           | NC+MYCN up vs NC-CTRL                         | 6.55153      | 2.11644       | 0.861454  | 1        |
| 1101 | RPL5P1         | RPL5P1         | 0.000183174        | 0.0061913                    | 1.70115                          | 1.70115                           | NC+MYCN up vs NC-CTRL                         | 25.7642      | 386.243       | 39.9772   | 1        |
| 1102 | EARS2          | EARS2          | 0.000408756        | 0.000138506                  | 1.70202                          | 1.70202                           | NC+MYCN up vs NC-CTRL                         | 20.5413      | 40.0818       | 5.2034    | 1        |
| 1103 | ADK            | ADK            | 0.000397059        | 0.00037844                   | 1.70298                          | 1.70298                           | NC+MYCN up vs NC-CTRL                         | 20.7126      | 136.113       | 17.5241   | 1        |
| 1104 | VWA8           | VWA8           | 0.0012915          | 0.000287242                  | 1.70463                          | 1.70463                           | NC+MYCN up vs NC-CTRL                         | 14.6645      | 24.8536       | 4.5195    | 1        |
| 1105 | PPTC7          | PPTC7          | 0.000188196        | 2.48E-05                     | 1.70486                          | 1.70486                           | NC+MYCN up vs NC-CTRL                         | 25.5706      | 13.433        | 1.40088   | 1        |
| 1106 | CGN            | CGN            | 2.08E-05           | 0.000481354                  | 1.71213                          | 1.71213                           | NC+MYCN up vs NC-CTRL                         | 46.5123      | 5.30132       | 0.303938  | 1        |
| 1107 | TSEN2          | TSEN2          | 0.00222588         | 0.000753976                  | 1.7125                           | 1.7125                            | NC+MYCN up vs NC-CTRL                         | 12.4194      | 8.18415       | 1.75728   | 1        |
| 1108 | RP11-218F10.3  | RP11-218F10.3  | 5.93E-05           | 0.00043004                   | 1.71637                          | 1.71637                           | NC+MYCN up vs NC-CTRL                         | 35.1111      | 37.4145       | 2.84161   | 1        |
| 1109 | PWWP2B         | PWWP2B         | 0.00222677         | 0.00137136                   | 1.71863                          | 1.71863                           | NC+MYCN up vs NC-CTRL                         | 12.4179      | 11.9417       | 2.56441   | 1        |
| 1110 | RPL12          | RPL12          | 0.000223529        | 0.000689681                  | 1.72302                          | 1.72302                           | NC+MYCN up vs NC-CTRL                         | 24.3694      | 106831        | 11690.2   | 1        |
| 1111 | FBRSL1         | FBRSL1         | 0.00439987         | 0.000705871                  | 1.72464                          | 1.72464                           | NC+MYCN up vs NC-CTRL                         | 10.0056      | 72.7527       | 19.3899   | 1        |
| 1112 | TFAP4          | TFAP4          | 0.00485135         | 0.00335897                   | 1.72651                          | 1.72651                           | NC+MYCN up vs NC-CTRL                         | 9.69188      | 9.04921       | 2.48984   | 1        |
| 1113 | RP11-49K24.8   | RP11-49K24.8   | 5.47E-05           | 0.000325845                  | 1.72839                          | 1.72839                           | NC+MYCN up vs NC-CTRL                         | 35.9029      | 1.03813       | 0.0771066 | 1        |
| 1114 | LL22NC03-2H8.5 | LL22NC03-2H8.5 | 0.000518616        | 0.00285884                   | 1.72878                          | 1.72878                           | NC+MYCN up vs NC-CTRL                         | 19.1832      | 7.8113        | 1.08585   | 1        |
| 1115 | RP11-218M22.1  | RP11-218M22.1  | 0.000175885        | 0.00292732                   | 1.73078                          | 1.73078                           | NC+MYCN up vs NC-CTRL                         | 26.0573      | 0.266784      | 0.0273023 | 1        |
| 1116 | ESF1           | ESF1           | 0.00227577         | 0.00114257                   | 1.73133                          | 1.73133                           | NC+MYCN up vs NC-CTRL                         | 12.3343      | 216.855       | 46.884    | 1        |
| 1117 | LINC00338      | LINC00338      | 8.84E-05           | 0.00146116                   | 1.73187                          | 1.73187                           | NC+MYCN up vs NC-CTRL                         | 31.5042      | 17.3793       | 1.47107   | 1        |
| 1118 | RPL34P33       | RPL34P33       | 0.00197157         | 0.00564071                   | 1.73246                          | 1.73246                           | NC+MYCN up vs NC-CTRL                         | 12.8938      | 113.31        | 23.4345   | 1        |

|      | Probeset ID   | Gene Symbol   | p-value(Attribute) | p-value(NC+MYCN vs. NC-CTRL) | MeanRatio(NC+MYCN N vs. NC-CTRL) | FoldChange(NC+MYCN N vs. NC-CTRL) | FoldChange(NC+MYCN vs. NC-CTRL) (Description) | F(Attribute) | SS(Attribute) | SS(Error) | F(Error) |
|------|---------------|---------------|--------------------|------------------------------|----------------------------------|-----------------------------------|-----------------------------------------------|--------------|---------------|-----------|----------|
| 1119 | CIRH1A        | CIRH1A        | 0.0112653          | 0.00326881                   | 1.73358                          | 1.73358                           | NC+MYCN up vs NC-CTRL                         | 7.27963      | 79.9489       | 29.2868   | 1        |
| 1120 | HSPA9         | HSPA9         | 0.0183068          | 0.00501294                   | 1.73386                          | 1.73386                           | NC+MYCN up vs NC-CTRL                         | 6.1013       | 4481.41       | 1958.67   | 1        |
| 1121 | EPT1          | EPT1          | 0.00728123         | 0.00103883                   | 1.73535                          | 1.73535                           | NC+MYCN up vs NC-CTRL                         | 8.46637      | 90.1188       | 28.3849   | 1        |
| 1122 | OPN1SW        | OPN1SW        | 0.00401812         | 0.00249549                   | 1.73778                          | 1.73778                           | NC+MYCN up vs NC-CTRL                         | 10.304       | 2.65666       | 0.687542  | 1        |
| 1123 | IQCH-AS1      | IQCH-AS1      | 0.000325918        | 0.00129063                   | 1.73901                          | 1.73901                           | NC+MYCN up vs NC-CTRL                         | 21.9105      | 1.90476       | 0.231823  | 1        |
| 1124 | EIF3M         | EIF3M         | 0.000762098        | 0.00097163                   | 1.7396                           | 1.7396                            | NC+MYCN up vs NC-CTRL                         | 17.1509      | 1368.1        | 212.716   | 1        |
| 1125 | C17orf76-AS1  | C17orf76-AS1  | 0.000121402        | 0.000297374                  | 1.74258                          | 1.74258                           | NC+MYCN up vs NC-CTRL                         | 28.8749      | 19906.5       | 1838.41   | 1        |
| 1126 | PDP2          | PDP2          | 0.0004253          | 0.000453331                  | 1.74305                          | 1.74305                           | NC+MYCN up vs NC-CTRL                         | 20.3093      | 36.1887       | 4.75167   | 1        |
| 1127 | RP1-168L15.5  | RP1-168L15.5  | 0.00270036         | 0.0086587                    | 1.74576                          | 1.74576                           | NC+MYCN up vs NC-CTRL                         | 11.6929      | 2.59147       | 0.591009  | 1        |
| 1128 | RCCD1         | RCCD1         | 0.0106771          | 0.0068472                    | 1.74729                          | 1.74729                           | NC+MYCN up vs NC-CTRL                         | 7.41863      | 17.0298       | 6.12146   | 1        |
| 1129 | EEF2          | EEF2          | 0.00523751         | 0.00373474                   | 1.75028                          | 1.75028                           | NC+MYCN up vs NC-CTRL                         | 9.45117      | 513982        | 145021    | 1        |
| 1130 | KLF16         | KLF16         | 6.13E-06           | 0.00203935                   | 1.75483                          | 1.75483                           | NC+MYCN up vs NC-CTRL                         | 64.1885      | 288.481       | 11.9847   | 1        |
| 1131 | IDH3A         | IDH3A         | 0.00202347         | 0.000559092                  | 1.75586                          | 1.75586                           | NC+MYCN up vs NC-CTRL                         | 12.791       | 14.3615       | 2.99409   | 1        |
| 1132 | LPAR3         | LPAR3         | 0.00257027         | 0.00743523                   | 1.75685                          | 1.75685                           | NC+MYCN up vs NC-CTRL                         | 11.8752      | 27.127        | 6.09158   | 1        |
| 1133 | TRMT61A       | TRMT61A       | 0.0242522          | 0.00699126                   | 1.76105                          | 1.76105                           | NC+MYCN up vs NC-CTRL                         | 5.48048      | 3.62046       | 1.76163   | 1        |
| 1134 | ACSL4         | ACSL4         | 8.63E-05           | 0.000427342                  | 1.76161                          | 1.76161                           | NC+MYCN up vs NC-CTRL                         | 31.7139      | 788.885       | 66.3335   | 1        |
| 1135 | VKORC1L1      | VKORC1L1      | 0.0154702          | 0.00816428                   | 1.76231                          | 1.76231                           | NC+MYCN up vs NC-CTRL                         | 6.494        | 113.166       | 46.4698   | 1        |
| 1136 | SETD6         | SETD6         | 0.00820743         | 0.00842954                   | 1.76255                          | 1.76255                           | NC+MYCN up vs NC-CTRL                         | 8.1279       | 25.5963       | 8.39784   | 1        |
| 1137 | GTPBP4        | GTPBP4        | 0.00346116         | 0.00121218                   | 1.7634                           | 1.7634                            | NC+MYCN up vs NC-CTRL                         | 10.8094      | 128.092       | 31.6003   | 1        |
| 1138 | RP11-234N17.1 | RP11-234N17.1 | 0.00289788         | 0.00853773                   | 1.76521                          | 1.76521                           | NC+MYCN up vs NC-CTRL                         | 11.436       | 3520.48       | 820.908   | 1        |
| 1139 | RALGDS        | RALGDS        | 0.00166498         | 0.000659838                  | 1.76617                          | 1.76617                           | NC+MYCN up vs NC-CTRL                         | 13.579       | 169.295       | 33.2465   | 1        |
| 1140 | TPCN1         | TPCN1         | 0.00202903         | 0.000704954                  | 1.76655                          | 1.76655                           | NC+MYCN up vs NC-CTRL                         | 12.7801      | 18.6768       | 3.89705   | 1        |
| 1141 | LARP1B        | LARP1B        | 0.00251635         | 0.00184857                   | 1.76704                          | 1.76704                           | NC+MYCN up vs NC-CTRL                         | 11.9542      | 9.833         | 2.19349   | 1        |
| 1142 | CCDC85C       | CCDC85C       | 0.00396683         | 0.00123294                   | 1.76804                          | 1.76804                           | NC+MYCN up vs NC-CTRL                         | 10.3468      | 35.526        | 9.1561    | 1        |
| 1143 | RPL5P12       | RPL5P12       | 2.88E-05           | 0.00341275                   | 1.76985                          | 1.76985                           | NC+MYCN up vs NC-CTRL                         | 42.6548      | 13.3231       | 0.832928  | 1        |
| 1144 | URB1          | URB1          | 0.00216394         | 0.00195906                   | 1.7705                           | 1.7705                            | NC+MYCN up vs NC-CTRL                         | 12.5285      | 37.9815       | 8.0843    | 1        |
| 1145 | TOMM20        | TOMM20        | 0.00306488         | 0.00247816                   | 1.7709                           | 1.7709                            | NC+MYCN up vs NC-CTRL                         | 11.2354      | 10403.1       | 2469.13   | 1        |
| 1146 | SDCCAG3       | SDCCAG3       | 0.0121818          | 0.00332965                   | 1.77266                          | 1.77266                           | NC+MYCN up vs NC-CTRL                         | 7.08015      | 287.689       | 108.355   | 1        |
| 1147 | PITRM1        | PITRM1        | 0.000142207        | 0.000332517                  | 1.77272                          | 1.77272                           | NC+MYCN up vs NC-CTRL                         | 27.6407      | 216.36        | 20.8736   | 1        |
| 1148 | EIF2A         | EIF2A         | 0.000638358        | 0.000136681                  | 1.77484                          | 1.77484                           | NC+MYCN up vs NC-CTRL                         | 18.0622      | 546.186       | 80.638    | 1        |
| 1149 | CEACAM19      | CEACAM19      | 0.000333963        | 0.00259934                   | 1.77568                          | 1.77568                           | NC+MYCN up vs NC-CTRL                         | 21.7594      | 3.86871       | 0.474121  | 1        |
| 1150 | IPO7          | IPO7          | 0.00117335         | 0.000304037                  | 1.77781                          | 1.77781                           | NC+MYCN up vs NC-CTRL                         | 15.0928      | 3236.76       | 571.888   | 1        |
| 1151 | MKI67IP       | MKI67IP       | 0.0105041          | 0.00191612                   | 1.78485                          | 1.78485                           | NC+MYCN up vs NC-CTRL                         | 7.46136      | 616.519       | 220.342   | 1        |
| 1152 | RPL34P18      | RPL34P18      | 0.0126619          | 0.00658684                   | 1.78502                          | 1.78502                           | NC+MYCN up vs NC-CTRL                         | 6.98297      | 35.3191       | 13.4877   | 1        |
| 1153 | RP11-114F3.5  | RP11-114F3.5  | 0.0168967          | 0.00847987                   | 1.78859                          | 1.78859                           | NC+MYCN up vs NC-CTRL                         | 6.28623      | 0.619655      | 0.262862  | 1        |
| 1154 | CYCS          | CYCS          | 0.0193305          | 0.0029754                    | 1.79034                          | 1.79034                           | NC+MYCN up vs NC-CTRL                         | 5.97782      | 697.045       | 310.947   | 1        |
| 1155 | PPATP1        | PPATP1        | 0.00101341         | 0.00108565                   | 1.79183                          | 1.79183                           | NC+MYCN up vs NC-CTRL                         | 15.767       | 3.34684       | 0.566051  | 1        |
| 1156 | RP11-6O2.4    | RP11-6O2.4    | 0.00486727         | 0.0088763                    | 1.79309                          | 1.79309                           | NC+MYCN up vs NC-CTRL                         | 9.68149      | 0.336963      | 0.0928131 | 1        |
| 1157 | ATAD3B        | ATAD3B        | 0.000839042        | 0.00487684                   | 1.79677                          | 1.79677                           | NC+MYCN up vs NC-CTRL                         | 16.6728      | 9.72405       | 1.55528   | 1        |
| 1158 | FAM86EP       | FAM86EP       | 0.000874039        | 0.000910419                  | 1.80019                          | 1.80019                           | NC+MYCN up vs NC-CTRL                         | 16.4731      | 5.79386       | 0.937909  | 1        |
| 1159 | PLOD2         | PLOD2         | 0.000239792        | 0.00442126                   | 1.8011                           | 1.8011                            | NC+MYCN up vs NC-CTRL                         | 23.8938      | 525.557       | 58.6547   | 1        |
| 1160 | CBS           | CBS           | 0.00196939         | 0.000703004                  | 1.80632                          | 1.80632                           | NC+MYCN up vs NC-CTRL                         | 12.8982      | 772.739       | 159.762   | 1        |
| 1161 | POLR1C        | POLR1C        | 0.0122653          | 0.00183877                   | 1.80729                          | 1.80729                           | NC+MYCN up vs NC-CTRL                         | 7.06292      | 39.8163       | 15.033    | 1        |

|      | Probeset ID  | Gene Symbol  | p-value(Attribute) | p-value(NC+MYCN vs. NC-CTRL) | MeanRatio(NC+MYCN N vs. NC-CTRL) | FoldChange(NC+MYCN N vs. NC-CTRL) | FoldChange(NC+MYCN vs. NC-CTRL) (Description) | F(Attribute) | SS(Attribute) | SS(Error)  | F(Error) |
|------|--------------|--------------|--------------------|------------------------------|----------------------------------|-----------------------------------|-----------------------------------------------|--------------|---------------|------------|----------|
| 1162 | RPL24P8      | RPL24P8      | 0.00943823         | 0.00706945                   | 1.80887                          | 1.80887                           | NC+MYCN up vs NC-CTRL                         | 7.74543      | 22.2827       | 7.6717     | 1        |
| 1163 | C1QBP        | C1QBP        | 0.00870201         | 0.00271646                   | 1.8309                           | 1.8309                            | NC+MYCN up vs NC-CTRL                         | 7.96612      | 2055.32       | 688.021    | 1        |
| 1164 | WDR12        | WDR12        | 0.000509952        | 6.33E-05                     | 1.83153                          | 1.83153                           | NC+MYCN up vs NC-CTRL                         | 19.2767      | 23.4406       | 3.24269    | 1        |
| 1165 | SCFD2        | SCFD2        | 0.00340375         | 0.000584068                  | 1.83377                          | 1.83377                           | NC+MYCN up vs NC-CTRL                         | 10.8672      | 28.3184       | 6.94895    | 1        |
| 1166 | RP11-137H2.6 | RP11-137H2.6 | 0.0121104          | 0.0019197                    | 1.83443                          | 1.83443                           | NC+MYCN up vs NC-CTRL                         | 7.09501      | 60.8049       | 22.8536    | 1        |
| 1167 | RPL5P3       | RPL5P3       | 0.00411599         | 0.00370356                   | 1.83456                          | 1.83456                           | NC+MYCN up vs NC-CTRL                         | 10.2242      | 14.3242       | 3.73601    | 1        |
| 1168 | SDHA         | SDHA         | 4.38E-05           | 6.50E-05                     | 1.83608                          | 1.83608                           | NC+MYCN up vs NC-CTRL                         | 38.1048      | 170.599       | 11.9389    | 1        |
| 1169 | RPS18P9      | RPS18P9      | 0.0011216          | 0.00336218                   | 1.83666                          | 1.83666                           | NC+MYCN up vs NC-CTRL                         | 15.2977      | 741.746       | 129.3      | 1        |
| 1170 | ANKRD18B     | ANKRD18B     | 0.00930136         | 0.00899793                   | 1.83775                          | 1.83775                           | NC+MYCN up vs NC-CTRL                         | 7.78479      | 6.97244       | 2.3884     | 1        |
| 1171 | RP11-61A14.3 | RP11-61A14.3 | 0.000752337        | 0.000636716                  | 1.84155                          | 1.84155                           | NC+MYCN up vs NC-CTRL                         | 17.2158      | 50.7588       | 7.86235    | 1        |
| 1172 | AK2          | AK2          | 9.70E-05           | 5.15E-05                     | 1.84222                          | 1.84222                           | NC+MYCN up vs NC-CTRL                         | 30.7151      | 637.785       | 55.3722    | 1        |
| 1173 | EIF3B        | EIF3B        | 0.00724752         | 0.00113828                   | 1.8437                           | 1.8437                            | NC+MYCN up vs NC-CTRL                         | 8.47969      | 402.41        | 126.549    | 1        |
| 1174 | RPL13AP5     | RPL13AP5     | 5.98E-05           | 9.55E-05                     | 1.85119                          | 1.85119                           | NC+MYCN up vs NC-CTRL                         | 35.045       | 413940        | 31497.9    | 1        |
| 1175 | YDJC         | YDJC         | 0.0029738          | 0.00184301                   | 1.85468                          | 1.85468                           | NC+MYCN up vs NC-CTRL                         | 11.3431      | 17.4917       | 4.11215    | 1        |
| 1176 | RPL26        | RPL26        | 0.0018334          | 0.000993329                  | 1.85566                          | 1.85566                           | NC+MYCN up vs NC-CTRL                         | 13.1848      | 122723        | 24821.1    | 1        |
| 1177 | RP4-592A1.2  | RP4-592A1.2  | 0.0197721          | 0.00465046                   | 1.85588                          | 1.85588                           | NC+MYCN up vs NC-CTRL                         | 5.92704      | 55.6286       | 25.0282    | 1        |
| 1178 | KIAA1984-AS1 | KIAA1984-AS1 | 0.0222205          | 0.0088795                    | 1.86643                          | 1.86643                           | NC+MYCN up vs NC-CTRL                         | 5.66905      | 0.534201      | 0.251283   | 1        |
| 1179 | 1-Mar        | 1-Mar        | 8.32E-06           | 5.19E-05                     | 1.86666                          | 1.86666                           | NC+MYCN up vs NC-CTRL                         | 59.2527      | 27.2582       | 1.22675    | 1        |
| 1180 | WDR3         | WDR3         | 0.0118555          | 0.00218555                   | 1.86678                          | 1.86678                           | NC+MYCN up vs NC-CTRL                         | 7.14897      | 40.5201       | 15.1146    | 1        |
| 1181 | GAS5         | GAS5         | 1.45E-05           | 1.44E-05                     | 1.86897                          | 1.86897                           | NC+MYCN up vs NC-CTRL                         | 51.1396      | 6022.47       | 314.041    | 1        |
| 1182 | TUBB1        | TUBB1        | 0.00461411         | 0.00553396                   | 1.87052                          | 1.87052                           | NC+MYCN up vs NC-CTRL                         | 9.85195      | 0.0325116     | 0.00880005 | 1        |
| 1183 | CCNB1IP1     | CCNB1IP1     | 0.00404478         | 0.00542683                   | 1.87065                          | 1.87065                           | NC+MYCN up vs NC-CTRL                         | 10.282       | 3302.65       | 856.551    | 1        |
| 1184 | USP36        | USP36        | 0.000171553        | 0.00155615                   | 1.87074                          | 1.87074                           | NC+MYCN up vs NC-CTRL                         | 26.2387      | 74.4698       | 7.56844    | 1        |
| 1185 | RP11-62J1.3  | RP11-62J1.3  | 0.00295705         | 0.00277892                   | 1.87261                          | 1.87261                           | NC+MYCN up vs NC-CTRL                         | 11.3633      | 15.6597       | 3.67491    | 1        |
| 1186 | AC140076.1   | AC140076.1   | 0.0133136          | 0.00411927                   | 1.87408                          | 1.87408                           | NC+MYCN up vs NC-CTRL                         | 6.85819      | 38.9946       | 15.1622    | 1        |
| 1187 | FGFRL1       | FGFRL1       | 0.000247365        | 0.00224295                   | 1.87514                          | 1.87514                           | NC+MYCN up vs NC-CTRL                         | 23.6859      | 114.702       | 12.9137    | 1        |
| 1188 | RPL5P24      | RPL5P24      | 1.50E-05           | 3.13E-05                     | 1.87867                          | 1.87867                           | NC+MYCN up vs NC-CTRL                         | 50.7238      | 710.613       | 37.3585    | 1        |
| 1189 | IFNAR2       | IFNAR2       | 0.0177363          | 0.0041036                    | 1.88219                          | 1.88219                           | NC+MYCN up vs NC-CTRL                         | 6.17391      | 9.734         | 4.20436    | 1        |
| 1190 | DENND4A      | DENND4A      | 0.00957477         | 0.00174917                   | 1.88224                          | 1.88224                           | NC+MYCN up vs NC-CTRL                         | 7.70686      | 10.7387       | 3.71572    | 1        |
| 1191 | NT5DC3       | NT5DC3       | 0.00274466         | 0.00312092                   | 1.8823                           | 1.8823                            | NC+MYCN up vs NC-CTRL                         | 11.6333      | 25.7689       | 5.90695    | 1        |
| 1192 | QSOX2        | QSOX2        | 0.000123038        | 1.57E-05                     | 1.88945                          | 1.88945                           | NC+MYCN up vs NC-CTRL                         | 28.7685      | 130.507       | 12.0972    | 1        |
| 1193 | PRKAA2       | PRKAA2       | 0.0201514          | 0.00867007                   | 1.89103                          | 1.89103                           | NC+MYCN up vs NC-CTRL                         | 5.88454      | 19.5168       | 8.8443     | 1        |
| 1194 | POLR1E       | POLR1E       | 0.000941383        | 0.000462601                  | 1.89117                          | 1.89117                           | NC+MYCN up vs NC-CTRL                         | 16.1156      | 371.945       | 61.5461    | 1        |
| 1195 | RPL5P30      | RPL5P30      | 0.00338519         | 0.0114896                    | 1.89861                          | 1.89861                           | NC+MYCN up vs NC-CTRL                         | 10.8862      | 5075.86       | 1243.38    | 1        |
| 1196 | RRP1B        | RRP1B        | 2.24E-05           | 1.46E-05                     | 1.9011                           | 1.9011                            | NC+MYCN up vs NC-CTRL                         | 45.5989      | 827.738       | 48.4069    | 1        |
| 1197 | PMM2         | PMM2         | 0.000646472        | 0.00558338                   | 1.90113                          | 1.90113                           | NC+MYCN up vs NC-CTRL                         | 17.9958      | 17.113        | 2.53584    | 1        |
| 1198 | MDN1         | MDN1         | 0.00143992         | 0.000357047                  | 1.90561                          | 1.90561                           | NC+MYCN up vs NC-CTRL                         | 14.1912      | 117.114       | 22.0068    | 1        |
| 1199 | ATP5G1       | ATP5G1       | 0.0135916          | 0.00228037                   | 1.91518                          | 1.91518                           | NC+MYCN up vs NC-CTRL                         | 6.80727      | 258.318       | 101.193    | 1        |
| 1200 | TIMM9        | TIMM9        | 0.000853748        | 0.000419901                  | 1.91547                          | 1.91547                           | NC+MYCN up vs NC-CTRL                         | 16.5876      | 619.436       | 99.582     | 1        |
| 1201 | NBEAL2       | NBEAL2       | 0.0102081          | 0.00258302                   | 1.91634                          | 1.91634                           | NC+MYCN up vs NC-CTRL                         | 7.53651      | 8.61006       | 3.04652    | 1        |
| 1202 | TAF1D        | TAF1D        | 9.48E-05           | 0.000144693                  | 1.91885                          | 1.91885                           | NC+MYCN up vs NC-CTRL                         | 30.9079      | 840.898       | 72.5509    | 1        |
| 1203 | GRPEL1       | GRPEL1       | 0.0176298          | 0.002852                     | 1.92184                          | 1.92184                           | NC+MYCN up vs NC-CTRL                         | 6.18779      | 31.521        | 13.5842    | 1        |
| 1204 | TMCC1-AS1    | TMCC1-AS1    | 0.000338171        | 0.00101826                   | 1.9243                           | 1.9243                            | NC+MYCN up vs NC-CTRL                         | 21.6821      | 35.2379       | 4.33388    | 1        |

|      | Probeset ID   | Gene Symbol   | p-value(Attribute) | p-value(NC+MYCN vs. NC-CTRL) | MeanRatio(NC+MYCN N vs. NC-CTRL) | FoldChange(NC+MYCN N vs. NC-CTRL) | FoldChange(NC+MYCN vs. NC-CTRL) (Description) | F(Attribute) | SS(Attribute) | SS(Error) | F(Error) |
|------|---------------|---------------|--------------------|------------------------------|----------------------------------|-----------------------------------|-----------------------------------------------|--------------|---------------|-----------|----------|
| 1205 | RP11-304L19.5 | RP11-304L19.5 | 0.000157614        | 0.000661788                  | 1.93095                          | 1.93095                           | NC+MYCN up vs NC-CTRL                         | 26.8638      | 2359.63       | 234.231   | 1        |
| 1206 | ARRB2         | ARRB2         | 0.0170788          | 0.010389                     | 1.93167                          | 1.93167                           | NC+MYCN up vs NC-CTRL                         | 6.2613       | 107.695       | 45.8671   | 1        |
| 1207 | SNHG16        | SNHG16        | 0.00364498         | 0.00495361                   | 1.93239                          | 1.93239                           | NC+MYCN up vs NC-CTRL                         | 10.632       | 542.048       | 135.954   | 1        |
| 1208 | CLCN2         | CLCN2         | 0.0028285          | 0.00324414                   | 1.93948                          | 1.93948                           | NC+MYCN up vs NC-CTRL                         | 11.5237      | 13.7722       | 3.187     | 1        |
| 1209 | AHCY          | AHCY          | 0.000172742        | 0.000107288                  | 1.93999                          | 1.93999                           | NC+MYCN up vs NC-CTRL                         | 26.1883      | 5838.97       | 594.562   | 1        |
| 1210 | EFCAB14-AS1   | EFCAB14-AS1   | 0.016784           | 0.00612196                   | 1.94373                          | 1.94373                           | NC+MYCN up vs NC-CTRL                         | 6.30184      | 0.17615       | 0.0745392 | 1        |
| 1211 | DDX10         | DDX10         | 0.0102767          | 0.00485794                   | 1.94805                          | 1.94805                           | NC+MYCN up vs NC-CTRL                         | 7.51886      | 57.1958       | 20.2853   | 1        |
| 1212 | GPX7          | GPX7          | 0.00137503         | 0.0112064                    | 1.95452                          | 1.95452                           | NC+MYCN up vs NC-CTRL                         | 14.3903      | 291.929       | 54.0975   | 1        |
| 1213 | SLC6A6        | SLC6A6        | 0.000387541        | 0.000547998                  | 1.95578                          | 1.95578                           | NC+MYCN up vs NC-CTRL                         | 20.8566      | 181.009       | 23.1433   | 1        |
| 1214 | MAK16         | MAK16         | 0.00590295         | 0.0034271                    | 1.95606                          | 1.95606                           | NC+MYCN up vs NC-CTRL                         | 9.0843       | 95.711        | 28.0956   | 1        |
| 1215 | PSTPIP2       | PSTPIP2       | 0.00010062         | 0.000414698                  | 1.95658                          | 1.95658                           | NC+MYCN up vs NC-CTRL                         | 30.4045      | 19.4914       | 1.70951   | 1        |
| 1216 | NOP14         | NOP14         | 0.00201656         | 0.000547839                  | 1.96014                          | 1.96014                           | NC+MYCN up vs NC-CTRL                         | 12.8045      | 395.089       | 82.2816   | 1        |
| 1217 | LTA4H         | LTA4H         | 9.09E-07           | 1.60E-06                     | 1.9618                           | 1.9618                            | NC+MYCN up vs NC-CTRL                         | 105.233      | 1466.85       | 37.1706   | 1        |
| 1218 | ADAT2         | ADAT2         | 4.17E-05           | 6.45E-05                     | 1.97059                          | 1.97059                           | NC+MYCN up vs NC-CTRL                         | 38.6279      | 29.3177       | 2.02394   | 1        |
| 1219 | RSL1D1        | RSL1D1        | 0.00282556         | 0.000671702                  | 1.97543                          | 1.97543                           | NC+MYCN up vs NC-CTRL                         | 11.5275      | 3498.96       | 809.419   | 1        |
| 1220 | LYAR          | LYAR          | 0.0102711          | 0.00249669                   | 1.98404                          | 1.98404                           | NC+MYCN up vs NC-CTRL                         | 7.52029      | 214.284       | 75.9841   | 1        |
| 1221 | DKC1          | DKC1          | 0.00248525         | 0.000486451                  | 1.99117                          | 1.99117                           | NC+MYCN up vs NC-CTRL                         | 12.0007      | 618.15        | 137.358   | 1        |
| 1222 | RPL32P29      | RPL32P29      | 0.000376091        | 0.0016211                    | 1.99168                          | 1.99168                           | NC+MYCN up vs NC-CTRL                         | 21.0359      | 178.002       | 22.5648   | 1        |
| 1223 | PTER          | PTER          | 0.000994957        | 0.00401373                   | 1.9992                           | 1.9992                            | NC+MYCN up vs NC-CTRL                         | 15.8533      | 27.662        | 4.653     | 1        |
| 1224 | GEMIN5        | GEMIN5        | 0.00296112         | 0.00117174                   | 2.0019                           | 2.0019                            | NC+MYCN up vs NC-CTRL                         | 11.3584      | 226.715       | 53.227    | 1        |
| 1225 | DLEU1         | DLEU1         | 0.0133106          | 0.00230416                   | 2.00191                          | 2.00191                           | NC+MYCN up vs NC-CTRL                         | 6.85876      | 1.06154       | 0.412723  | 1        |
| 1226 | BCAT2         | BCAT2         | 0.00108094         | 0.000338444                  | 2.00414                          | 2.00414                           | NC+MYCN up vs NC-CTRL                         | 15.4671      | 32.3805       | 5.58267   | 1        |
| 1227 | PRELID2       | PRELID2       | 0.00266471         | 0.00189795                   | 2.00928                          | 2.00928                           | NC+MYCN up vs NC-CTRL                         | 11.7417      | 1.243         | 0.282298  | 1        |
| 1228 | SNHG12        | SNHG12        | 0.00149663         | 0.000861682                  | 2.00978                          | 2.00978                           | NC+MYCN up vs NC-CTRL                         | 14.0262      | 29.8985       | 5.68433   | 1        |
| 1229 | RP11-389C8.3  | RP11-389C8.3  | 0.0205431          | 0.0105191                    | 2.01068                          | 2.01068                           | NC+MYCN up vs NC-CTRL                         | 5.84169      | 12.7715       | 5.83003   | 1        |
| 1230 | POLR3D        | POLR3D        | 0.000241265        | 3.51E-05                     | 2.01104                          | 2.01104                           | NC+MYCN up vs NC-CTRL                         | 23.8527      | 164.993       | 18.4458   | 1        |
| 1231 | RP11-13N13.6  | RP11-13N13.6  | 0.0038675          | 0.00212799                   | 2.01198                          | 2.01198                           | NC+MYCN up vs NC-CTRL                         | 10.4316      | 0.124777      | 0.0318971 | 1        |
| 1232 | SLMO2         | SLMO2         | 0.00725057         | 0.00868655                   | 2.01535                          | 2.01535                           | NC+MYCN up vs NC-CTRL                         | 8.47848      | 474.848       | 149.35    | 1        |
| 1233 | RP11-660L16.2 | RP11-660L16.2 | 0.00308084         | 0.0058804                    | 2.01747                          | 2.01747                           | NC+MYCN up vs NC-CTRL                         | 11.2169      | 187.467       | 44.5677   | 1        |
| 1234 | CTD-2530N21.4 | CTD-2530N21.4 | 0.00241524         | 0.000336567                  | 2.02811                          | 2.02811                           | NC+MYCN up vs NC-CTRL                         | 12.1082      | 12.0012       | 2.64312   | 1        |
| 1235 | TNFRSF10D     | TNFRSF10D     | 0.00104597         | 0.00838666                   | 2.02848                          | 2.02848                           | NC+MYCN up vs NC-CTRL                         | 15.6194      | 174.793       | 29.842    | 1        |
| 1236 | TLL12         | TLL12         | 0.00420046         | 0.00111444                   | 2.02897                          | 2.02897                           | NC+MYCN up vs NC-CTRL                         | 10.1572      | 214.426       | 56.2951   | 1        |
| 1237 | AC104297.1    | AC104297.1    | 0.00929436         | 0.00645474                   | 2.03021                          | 2.03021                           | NC+MYCN up vs NC-CTRL                         | 7.78683      | 54.0891       | 18.5233   | 1        |
| 1238 | SNHG15        | SNHG15        | 0.00103515         | 0.000223665                  | 2.03812                          | 2.03812                           | NC+MYCN up vs NC-CTRL                         | 15.6678      | 47.8426       | 8.14283   | 1        |
| 1239 | SLC2A4        | SLC2A4        | 0.00246312         | 0.00867906                   | 2.03833                          | 2.03833                           | NC+MYCN up vs NC-CTRL                         | 12.0343      | 10.9708       | 2.43102   | 1        |
| 1240 | SLC25A32      | SLC25A32      | 0.00402113         | 0.000631239                  | 2.04302                          | 2.04302                           | NC+MYCN up vs NC-CTRL                         | 10.3015      | 45.9634       | 11.8982   | 1        |
| 1241 | ARMC12        | ARMC12        | 0.0219905          | 0.0109808                    | 2.04479                          | 2.04479                           | NC+MYCN up vs NC-CTRL                         | 5.69174      | 12.4322       | 5.82466   | 1        |
| 1242 | RP11-488P3.1  | RP11-488P3.1  | 1.94E-05           | 3.18E-05                     | 2.05467                          | 2.05467                           | NC+MYCN up vs NC-CTRL                         | 47.4134      | 1.63689       | 0.0920635 | 1        |
| 1243 | PNPT1         | PNPT1         | 0.00458544         | 0.000927231                  | 2.05476                          | 2.05476                           | NC+MYCN up vs NC-CTRL                         | 9.87199      | 168.268       | 45.4532   | 1        |
| 1244 | CTC-308K20.3  | CTC-308K20.3  | 0.00892886         | 0.00172021                   | 2.05831                          | 2.05831                           | NC+MYCN up vs NC-CTRL                         | 7.89571      | 54.0705       | 18.2615   | 1        |
| 1245 | BCO2          | BCO2          | 0.000227379        | 0.000298654                  | 2.05953                          | 2.05953                           | NC+MYCN up vs NC-CTRL                         | 24.253       | 0.149259      | 0.0164113 | 1        |
| 1246 | ERVH48-1      | ERVH48-1      | 0.00522029         | 0.00541802                   | 2.06409                          | 2.06409                           | NC+MYCN up vs NC-CTRL                         | 9.46143      | 0.234724      | 0.066156  | 1        |
| 1247 | APOC1         | APOC1         | 0.00127668         | 0.00593275                   | 2.06502                          | 2.06502                           | NC+MYCN up vs NC-CTRL                         | 14.7155      | 11.8944       | 2.15543   | 1        |



|      | Probeset ID   | Gene Symbol   | p-value(Attribute) | p-value(NC+MYCN vs. NC-CTRL) | MeanRatio(NC+MYCN N vs. NC-CTRL) | FoldChange(NC+MYCN N vs. NC-CTRL) | FoldChange(NC+MYCN vs. NC-CTRL) (Description) | F(Attribute) | SS(Attribute) | SS(Error) | F(Error) |
|------|---------------|---------------|--------------------|------------------------------|----------------------------------|-----------------------------------|-----------------------------------------------|--------------|---------------|-----------|----------|
| 1248 | POLR1B        | POLR1B        | 5.52E-05           | 0.000249662                  | 2.06553                          | 2.06553                           | NC+MYCN up vs NC-CTRL                         | 35.8067      | 128.726       | 9.58677   | 1        |
| 1249 | IMP4          | IMP4          | 0.000520443        | 0.000111873                  | 2.06582                          | 2.06582                           | NC+MYCN up vs NC-CTRL                         | 19.1637      | 169.282       | 23.5559   | 1        |
| 1250 | AC010761.8    | AC010761.8    | 0.0109806          | 0.00311755                   | 2.06584                          | 2.06584                           | NC+MYCN up vs NC-CTRL                         | 7.34576      | 75.9699       | 27.5787   | 1        |
| 1251 | RRP12         | RRP12         | 0.00164385         | 0.00162922                   | 2.06715                          | 2.06715                           | NC+MYCN up vs NC-CTRL                         | 13.6319      | 41.7732       | 8.17164   | 1        |
| 1252 | MBLAC2        | MBLAC2        | 0.000183816        | 7.71E-05                     | 2.07002                          | 2.07002                           | NC+MYCN up vs NC-CTRL                         | 25.7391      | 27.5858       | 2.858     | 1        |
| 1253 | NOC3L         | NOC3L         | 0.00236762         | 0.000671368                  | 2.07071                          | 2.07071                           | NC+MYCN up vs NC-CTRL                         | 12.1835      | 100.959       | 22.0974   | 1        |
| 1254 | SLC43A1       | SLC43A1       | 3.47E-05           | 3.67E-05                     | 2.07223                          | 2.07223                           | NC+MYCN up vs NC-CTRL                         | 40.5674      | 10.885        | 0.715519  | 1        |
| 1255 | EPB41L4A-AS1  | EPB41L4A-AS1  | 0.000152843        | 7.10E-05                     | 2.07895                          | 2.07895                           | NC+MYCN up vs NC-CTRL                         | 27.0939      | 120.231       | 11.8336   | 1        |
| 1256 | NHSL1         | NHSL1         | 0.00108013         | 0.00393175                   | 2.07917                          | 2.07917                           | NC+MYCN up vs NC-CTRL                         | 15.4706      | 20.6085       | 3.55228   | 1        |
| 1257 | CTD-2008L17.1 | CTD-2008L17.1 | 0.000483169        | 0.00308882                   | 2.08502                          | 2.08502                           | NC+MYCN up vs NC-CTRL                         | 19.5787      | 0.464123      | 0.0632147 | 1        |
| 1258 | PNPT1P1       | PNPT1P1       | 0.00238571         | 0.000752434                  | 2.0864                           | 2.0864                            | NC+MYCN up vs NC-CTRL                         | 12.1547      | 1.96033       | 0.430085  | 1        |
| 1259 | NR2C2AP       | NR2C2AP       | 0.000678826        | 0.00770302                   | 2.08922                          | 2.08922                           | NC+MYCN up vs NC-CTRL                         | 17.7414      | 34.2642       | 5.15016   | 1        |
| 1260 | AC009404.2    | AC009404.2    | 0.000123794        | 0.000317892                  | 2.09562                          | 2.09562                           | NC+MYCN up vs NC-CTRL                         | 28.72        | 7.71752       | 0.716577  | 1        |
| 1261 | DIAPH2        | DIAPH2        | 0.00682467         | 0.0031036                    | 2.09801                          | 2.09801                           | NC+MYCN up vs NC-CTRL                         | 8.65364      | 9.04683       | 2.78783   | 1        |
| 1262 | CCDC86        | CCDC86        | 0.00828007         | 0.0018615                    | 2.10362                          | 2.10362                           | NC+MYCN up vs NC-CTRL                         | 8.10339      | 396.67        | 130.536   | 1        |
| 1263 | RRS1          | RRS1          | 0.00841753         | 0.00214914                   | 2.10392                          | 2.10392                           | NC+MYCN up vs NC-CTRL                         | 8.05773      | 239.676       | 79.3195   | 1        |
| 1264 | RAB11FIP1     | RAB11FIP1     | 0.005255           | 0.00084529                   | 2.10815                          | 2.10815                           | NC+MYCN up vs NC-CTRL                         | 9.44079      | 3.18648       | 0.90006   | 1        |
| 1265 | MXRA8         | MXRA8         | 0.00526772         | 0.010058                     | 2.10917                          | 2.10917                           | NC+MYCN up vs NC-CTRL                         | 9.43328      | 307.172       | 86.8336   | 1        |
| 1266 | SLC25A4       | SLC25A4       | 0.0128863          | 0.00563414                   | 2.1103                           | 2.1103                            | NC+MYCN up vs NC-CTRL                         | 6.93913      | 37.8158       | 14.5324   | 1        |
| 1267 | TRIB1         | TRIB1         | 0.0155817          | 0.0071433                    | 2.11114                          | 2.11114                           | NC+MYCN up vs NC-CTRL                         | 6.47692      | 13.4245       | 5.52711   | 1        |
| 1268 | SNORA79       | SNORA79       | 0.00256614         | 0.00232606                   | 2.11476                          | 2.11476                           | NC+MYCN up vs NC-CTRL                         | 11.8812      | 2.92699       | 0.656947  | 1        |
| 1269 | ATP2A1        | ATP2A1        | 0.0104062          | 0.0113525                    | 2.11737                          | 2.11737                           | NC+MYCN up vs NC-CTRL                         | 7.48591      | 6.79501       | 2.42055   | 1        |
| 1270 | SERGEF        | SERGEF        | 0.00719046         | 0.00275998                   | 2.11747                          | 2.11747                           | NC+MYCN up vs NC-CTRL                         | 8.50241      | 5.38608       | 1.68927   | 1        |
| 1271 | SLC9B2        | SLC9B2        | 0.00332811         | 0.00171241                   | 2.12019                          | 2.12019                           | NC+MYCN up vs NC-CTRL                         | 10.9453      | 13.7057       | 3.33919   | 1        |
| 1272 | ALDH1B1       | ALDH1B1       | 1.43E-05           | 3.25E-06                     | 2.12392                          | 2.12392                           | NC+MYCN up vs NC-CTRL                         | 51.3948      | 163.566       | 8.48675   | 1        |
| 1273 | AGAP4         | AGAP4         | 4.51E-06           | 0.000457419                  | 2.12601                          | 2.12601                           | NC+MYCN up vs NC-CTRL                         | 69.54        | 9.84077       | 0.377367  | 1        |
| 1274 | TXLNG         | TXLNG         | 6.12E-05           | 3.07E-05                     | 2.12915                          | 2.12915                           | NC+MYCN up vs NC-CTRL                         | 34.8154      | 659.166       | 50.4886   | 1        |
| 1275 | SCARB1        | SCARB1        | 0.00325321         | 0.00235846                   | 2.13372                          | 2.13372                           | NC+MYCN up vs NC-CTRL                         | 11.0249      | 457.79        | 110.729   | 1        |
| 1276 | PNO1          | PNO1          | 0.0210844          | 0.0036893                    | 2.13623                          | 2.13623                           | NC+MYCN up vs NC-CTRL                         | 5.78411      | 68.9913       | 31.8073   | 1        |
| 1277 | MED12L        | MED12L        | 0.00484857         | 0.00615455                   | 2.13644                          | 2.13644                           | NC+MYCN up vs NC-CTRL                         | 9.69369      | 1.12155       | 0.30853   | 1        |
| 1278 | DHX33         | DHX33         | 0.00569361         | 0.0010319                    | 2.13973                          | 2.13973                           | NC+MYCN up vs NC-CTRL                         | 9.19391      | 225.016       | 65.2652   | 1        |
| 1279 | SAMD5         | SAMD5         | 0.00203387         | 0.0108323                    | 2.14315                          | 2.14315                           | NC+MYCN up vs NC-CTRL                         | 12.7708      | 12.6132       | 2.63377   | 1        |
| 1280 | PHKA1P1       | PHKA1P1       | 0.0173314          | 0.00531376                   | 2.14684                          | 2.14684                           | NC+MYCN up vs NC-CTRL                         | 6.22723      | 5.94583       | 2.54616   | 1        |
| 1281 | FYCO1         | FYCO1         | 0.000309592        | 0.000259714                  | 2.1531                           | 2.1531                            | NC+MYCN up vs NC-CTRL                         | 22.2321      | 18.4479       | 2.21276   | 1        |
| 1282 | RP11-513M16.8 | RP11-513M16.8 | 0.00028506         | 0.000190423                  | 2.16918                          | 2.16918                           | NC+MYCN up vs NC-CTRL                         | 22.7575      | 11.6828       | 1.36896   | 1        |
| 1283 | LRPPRC        | LRPPRC        | 8.27E-05           | 1.82E-05                     | 2.17103                          | 2.17103                           | NC+MYCN up vs NC-CTRL                         | 32.0791      | 2399.55       | 199.47    | 1        |
| 1284 | LINC00562     | LINC00562     | 0.00241151         | 0.000559083                  | 2.19059                          | 2.19059                           | NC+MYCN up vs NC-CTRL                         | 12.114       | 0.0953673     | 0.0209933 | 1        |
| 1285 | RP11-372K14.2 | RP11-372K14.2 | 0.00303555         | 0.00303059                   | 2.19821                          | 2.19821                           | NC+MYCN up vs NC-CTRL                         | 11.2696      | 2.26517       | 0.535994  | 1        |
| 1286 | RP11-10L12.2  | RP11-10L12.2  | 0.00421561         | 0.00149124                   | 2.201                            | 2.201                             | NC+MYCN up vs NC-CTRL                         | 10.1454      | 0.161331      | 0.042405  | 1        |
| 1287 | AC127904.2    | AC127904.2    | 0.003212           | 0.0114131                    | 2.20806                          | 2.20806                           | NC+MYCN up vs NC-CTRL                         | 11.0696      | 1.70673       | 0.41115   | 1        |
| 1288 | RABGGTB       | RABGGTB       | 2.95E-06           | 1.13E-06                     | 2.20965                          | 2.20965                           | NC+MYCN up vs NC-CTRL                         | 77.6584      | 533.949       | 18.335    | 1        |
| 1289 | MAP6D1        | MAP6D1        | 0.0178518          | 0.00466687                   | 2.21149                          | 2.21149                           | NC+MYCN up vs NC-CTRL                         | 6.15898      | 5.98565       | 2.59162   | 1        |
| 1290 | RP11-527J8.1  | RP11-527J8.1  | 0.00187473         | 0.00535467                   | 2.22898                          | 2.22898                           | NC+MYCN up vs NC-CTRL                         | 13.0949      | 22.3152       | 4.54429   | 1        |

|      | Probeset ID   | Gene Symbol   | p-value(Attribute) | p-value(NC+MYCN vs. NC-CTRL) | MeanRatio(NC+MYCN N vs. NC-CTRL) | FoldChange(NC+MYCN N vs. NC-CTRL) | FoldChange(NC+MYCN vs. NC-CTRL) (Description) | F(Attribute) | SS(Attribute) | SS(Error)   | F(Error) |
|------|---------------|---------------|--------------------|------------------------------|----------------------------------|-----------------------------------|-----------------------------------------------|--------------|---------------|-------------|----------|
| 1291 | PPA1          | PPA1          | 0.000119737        | 7.35E-05                     | 2.23256                          | 2.23256                           | NC+MYCN up vs NC-CTRL                         | 28.9849      | 1544.81       | 142.126     | 1        |
| 1292 | RND2          | RND2          | 0.000508935        | 0.00284474                   | 2.24551                          | 2.24551                           | NC+MYCN up vs NC-CTRL                         | 19.2878      | 13.0941       | 1.81035     | 1        |
| 1293 | RRP9          | RRP9          | 0.00218125         | 0.00131578                   | 2.25113                          | 2.25113                           | NC+MYCN up vs NC-CTRL                         | 12.4976      | 438.15        | 93.4898     | 1        |
| 1294 | PRKG1         | PRKG1         | 0.00173705         | 0.00546294                   | 2.25333                          | 2.25333                           | NC+MYCN up vs NC-CTRL                         | 13.4044      | 22.2413       | 4.42467     | 1        |
| 1295 | RP11-498E2.7  | RP11-498E2.7  | 0.00111065         | 0.000168276                  | 2.25795                          | 2.25795                           | NC+MYCN up vs NC-CTRL                         | 15.3426      | 3.07432       | 0.534343    | 1        |
| 1296 | LIPG          | LIPG          | 0.000403873        | 0.0013609                    | 2.2585                           | 2.2585                            | NC+MYCN up vs NC-CTRL                         | 20.6121      | 43.1285       | 5.57972     | 1        |
| 1297 | YBX3          | YBX3          | 6.01E-11           | 7.07E-10                     | 2.26239                          | 2.26239                           | NC+MYCN up vs NC-CTRL                         | 1196.76      | 716.938       | 1.59751     | 1        |
| 1298 | RP11-181I4.10 | RP11-181I4.10 | 0.00157739         | 0.000443432                  | 2.26906                          | 2.26906                           | NC+MYCN up vs NC-CTRL                         | 13.8042      | 2.77453       | 0.535978    | 1        |
| 1299 | RP11-763E3.1  | RP11-763E3.1  | 0.00306475         | 0.0118421                    | 2.27139                          | 2.27139                           | NC+MYCN up vs NC-CTRL                         | 11.2355      | 0.839664      | 0.199288    | 1        |
| 1300 | AC005262.4    | AC005262.4    | 0.000456764        | 0.00156387                   | 2.27483                          | 2.27483                           | NC+MYCN up vs NC-CTRL                         | 19.8977      | 1.16105       | 0.155602    | 1        |
| 1301 | ARHGAP18      | ARHGAP18      | 0.00215301         | 0.00260423                   | 2.27489                          | 2.27489                           | NC+MYCN up vs NC-CTRL                         | 12.5481      | 28.4545       | 6.047       | 1        |
| 1302 | TATDN2P2      | TATDN2P2      | 0.00585118         | 0.00304893                   | 2.27543                          | 2.27543                           | NC+MYCN up vs NC-CTRL                         | 9.11095      | 4.80374       | 1.406       | 1        |
| 1303 | YBX3P1        | YBX3P1        | 9.43E-06           | 7.97E-05                     | 2.27608                          | 2.27608                           | NC+MYCN up vs NC-CTRL                         | 57.326       | 34.0658       | 1.58466     | 1        |
| 1304 | WDR43         | WDR43         | 0.000939634        | 0.000293686                  | 2.29179                          | 2.29179                           | NC+MYCN up vs NC-CTRL                         | 16.1245      | 1215.11       | 200.955     | 1        |
| 1305 | PPFIA3        | PPFIA3        | 0.00999109         | 0.009469                     | 2.2929                           | 2.2929                            | NC+MYCN up vs NC-CTRL                         | 7.59336      | 12.5655       | 4.41279     | 1        |
| 1306 | RP11-434B12.1 | RP11-434B12.1 | 0.0117156          | 0.00638354                   | 2.30206                          | 2.30206                           | NC+MYCN up vs NC-CTRL                         | 7.1792       | 2.70463       | 1.00462     | 1        |
| 1307 | SLC7A5        | SLC7A5        | 0.0197361          | 0.00380964                   | 2.30213                          | 2.30213                           | NC+MYCN up vs NC-CTRL                         | 5.93113      | 254.47        | 114.411     | 1        |
| 1308 | KATNB1        | KATNB1        | 0.0183081          | 0.00399872                   | 2.3174                           | 2.3174                            | NC+MYCN up vs NC-CTRL                         | 6.10113      | 75.8433       | 33.1494     | 1        |
| 1309 | SNHG3         | SNHG3         | 3.70E-05           | 7.16E-05                     | 2.32439                          | 2.32439                           | NC+MYCN up vs NC-CTRL                         | 39.8968      | 4428.29       | 295.983     | 1        |
| 1310 | BOP1          | BOP1          | 0.0240106          | 0.00814415                   | 2.32837                          | 2.32837                           | NC+MYCN up vs NC-CTRL                         | 5.50185      | 148.281       | 71.8696     | 1        |
| 1311 | SLC39A14      | SLC39A14      | 0.00251065         | 0.000457316                  | 2.33234                          | 2.33234                           | NC+MYCN up vs NC-CTRL                         | 11.9627      | 161.328       | 35.9626     | 1        |
| 1312 | PPM1L         | PPM1L         | 0.000401384        | 0.000423581                  | 2.34178                          | 2.34178                           | NC+MYCN up vs NC-CTRL                         | 20.6485      | 88.9596       | 11.4887     | 1        |
| 1313 | PPIL6         | PPIL6         | 0.0234096          | 0.00539753                   | 2.34481                          | 2.34481                           | NC+MYCN up vs NC-CTRL                         | 5.5562       | 0.479187      | 0.229983    | 1        |
| 1314 | PHKA1         | PHKA1         | 0.000351644        | 0.000180043                  | 2.34626                          | 2.34626                           | NC+MYCN up vs NC-CTRL                         | 21.4426      | 36.4143       | 4.5286      | 1        |
| 1315 | ANKRD65       | ANKRD65       | 0.00157232         | 0.00240147                   | 2.34954                          | 2.34954                           | NC+MYCN up vs NC-CTRL                         | 13.8177      | 0.82281       | 0.158793    | 1        |
| 1316 | UBE2FP3       | UBE2FP3       | 0.000513364        | 0.000552133                  | 2.35111                          | 2.35111                           | NC+MYCN up vs NC-CTRL                         | 19.2396      | 13.4418       | 1.86308     | 1        |
| 1317 | SLC29A2       | SLC29A2       | 0.0128026          | 0.00841336                   | 2.35158                          | 2.35158                           | NC+MYCN up vs NC-CTRL                         | 6.95537      | 342.609       | 131.355     | 1        |
| 1318 | NOP16         | NOP16         | 0.000790519        | 0.000188037                  | 2.36332                          | 2.36332                           | NC+MYCN up vs NC-CTRL                         | 16.9675      | 179.498       | 28.2105     | 1        |
| 1319 | RP11-15N24.4  | RP11-15N24.4  | 0.000192689        | 0.000225381                  | 2.36711                          | 2.36711                           | NC+MYCN up vs NC-CTRL                         | 25.4028      | 0.989184      | 0.10384     | 1        |
| 1320 | FAM195A       | FAM195A       | 0.0241662          | 0.00682979                   | 2.37341                          | 2.37341                           | NC+MYCN up vs NC-CTRL                         | 5.48805      | 10.1129       | 4.91388     | 1        |
| 1321 | CYP3A4        | CYP3A4        | 0.00666678         | 0.00978341                   | 2.37672                          | 2.37672                           | NC+MYCN up vs NC-CTRL                         | 8.72207      | 0.0255515     | 0.00781207  | 1        |
| 1322 | C10orf2       | C10orf2       | 0.000479708        | 0.00537768                   | 2.38522                          | 2.38522                           | NC+MYCN up vs NC-CTRL                         | 19.6193      | 138.646       | 18.8449     | 1        |
| 1323 | TOP1MT        | TOP1MT        | 0.000207733        | 0.000165851                  | 2.38958                          | 2.38958                           | NC+MYCN up vs NC-CTRL                         | 24.8748      | 124.637       | 13.3616     | 1        |
| 1324 | RP11-31F15.1  | RP11-31F15.1  | 0.00127303         | 0.00164962                   | 2.3941                           | 2.3941                            | NC+MYCN up vs NC-CTRL                         | 14.7282      | 5.73451       | 1.03829     | 1        |
| 1325 | CYP3A7        | CYP3A7        | 0.000354572        | 0.000789245                  | 2.40425                          | 2.40425                           | NC+MYCN up vs NC-CTRL                         | 21.392       | 0.07219       | 0.008999    | 1        |
| 1326 | AC093382.1    | AC093382.1    | 0.0166448          | 0.00480825                   | 2.41322                          | 2.41322                           | NC+MYCN up vs NC-CTRL                         | 6.32129      | 0.106823      | 0.0450638   | 1        |
| 1327 | A1CF          | A1CF          | 0.00646815         | 0.00607026                   | 2.4289                           | 2.4289                            | NC+MYCN up vs NC-CTRL                         | 8.81109      | 0.0031099     | 0.000941208 | 1        |
| 1328 | FAM189A2      | FAM189A2      | 0.000687228        | 0.00265747                   | 2.42912                          | 2.42912                           | NC+MYCN up vs NC-CTRL                         | 17.6779      | 0.461014      | 0.069543    | 1        |
| 1329 | LRFN1         | LRFN1         | 0.00810527         | 0.00621255                   | 2.43996                          | 2.43996                           | NC+MYCN up vs NC-CTRL                         | 8.16284      | 5.42073       | 1.77086     | 1        |
| 1330 | CTD-2256P15.4 | CTD-2256P15.4 | 0.0152417          | 0.00279745                   | 2.45291                          | 2.45291                           | NC+MYCN up vs NC-CTRL                         | 6.5295       | 0.111653      | 0.0455992   | 1        |
| 1331 | RSL24D1P11    | RSL24D1P11    | 0.00317068         | 0.000996712                  | 2.46085                          | 2.46085                           | NC+MYCN up vs NC-CTRL                         | 11.1152      | 1.38055       | 0.331211    | 1        |
| 1332 | AC007386.3    | AC007386.3    | 0.0144885          | 0.00397402                   | 2.46253                          | 2.46253                           | NC+MYCN up vs NC-CTRL                         | 6.65139      | 0.828395      | 0.332119    | 1        |
| 1333 | RTN4R         | RTN4R         | 0.0140905          | 0.00923906                   | 2.46583                          | 2.46583                           | NC+MYCN up vs NC-CTRL                         | 6.71902      | 17.0811       | 6.77921     | 1        |

|      | Probeset ID  | Gene Symbol  | p-value(Attribute) | p-value(NC+MYCN vs. NC-CTRL) | MeanRatio(NC+MYCN N vs. NC-CTRL) | FoldChange(NC+MYCN N vs. NC-CTRL) | FoldChange(NC+MYCN vs. NC-CTRL) (Description) | F(Attribute) | SS(Attribute) | SS(Error) | F(Error) |
|------|--------------|--------------|--------------------|------------------------------|----------------------------------|-----------------------------------|-----------------------------------------------|--------------|---------------|-----------|----------|
| 1334 | GNL3         | GNL3         | 0.000396036        | 0.000162819                  | 2.46982                          | 2.46982                           | NC+MYCN up vs NC-CTRL                         | 20.7278      | 7522.89       | 967.831   | 1        |
| 1335 | ADA          | ADA          | 0.0212031          | 0.00445907                   | 2.4727                           | 2.4727                            | NC+MYCN up vs NC-CTRL                         | 5.77173      | 7.51995       | 3.47438   | 1        |
| 1336 | CYP2E1       | CYP2E1       | 4.40E-05           | 0.000132031                  | 2.47521                          | 2.47521                           | NC+MYCN up vs NC-CTRL                         | 38.0708      | 0.122037      | 0.0085481 | 1        |
| 1337 | NOLC1        | NOLC1        | 0.000121482        | 1.48E-05                     | 2.48775                          | 2.48775                           | NC+MYCN up vs NC-CTRL                         | 28.8696      | 6369.27       | 588.325   | 1        |
| 1338 | ZNF276       | ZNF276       | 0.00174627         | 0.000710813                  | 2.48956                          | 2.48956                           | NC+MYCN up vs NC-CTRL                         | 13.3828      | 106.334       | 21.1882   | 1        |
| 1339 | RCL1         | RCL1         | 0.00355834         | 0.00204669                   | 2.49072                          | 2.49072                           | NC+MYCN up vs NC-CTRL                         | 10.7142      | 18.7168       | 4.65845   | 1        |
| 1340 | MARS2        | MARS2        | 0.00258756         | 0.00151056                   | 2.50102                          | 2.50102                           | NC+MYCN up vs NC-CTRL                         | 11.8503      | 108.667       | 24.4532   | 1        |
| 1341 | FUOM         | FUOM         | 0.0107134          | 0.00237732                   | 2.50881                          | 2.50881                           | NC+MYCN up vs NC-CTRL                         | 7.4098       | 3.73832       | 1.34536   | 1        |
| 1342 | OR7M1P       | OR7M1P       | 0.000785089        | 0.00221896                   | 2.5202                           | 2.5202                            | NC+MYCN up vs NC-CTRL                         | 17.0019      | 0.731249      | 0.114693  | 1        |
| 1343 | ALG1L13P     | ALG1L13P     | 0.0115138          | 0.00406599                   | 2.52195                          | 2.52195                           | NC+MYCN up vs NC-CTRL                         | 7.22359      | 1.88795       | 0.696958  | 1        |
| 1344 | ABHD15       | ABHD15       | 0.000863903        | 0.000522973                  | 2.52841                          | 2.52841                           | NC+MYCN up vs NC-CTRL                         | 16.5299      | 7.4679        | 1.20475   | 1        |
| 1345 | C3orf83      | C3orf83      | 0.00794213         | 0.00483624                   | 2.52917                          | 2.52917                           | NC+MYCN up vs NC-CTRL                         | 8.21979      | 0.868525      | 0.281767  | 1        |
| 1346 | PALD1        | PALD1        | 0.000399449        | 0.000338399                  | 2.53266                          | 2.53266                           | NC+MYCN up vs NC-CTRL                         | 20.6771      | 138.972       | 17.9229   | 1        |
| 1347 | RP5-1142A6.2 | RP5-1142A6.2 | 0.0122905          | 0.00534412                   | 2.53718                          | 2.53718                           | NC+MYCN up vs NC-CTRL                         | 7.05775      | 0.0646995     | 0.0244458 | 1        |
| 1348 | CLGN         | CLGN         | 0.00882666         | 0.00211048                   | 2.53784                          | 2.53784                           | NC+MYCN up vs NC-CTRL                         | 7.92715      | 87.782        | 29.5296   | 1        |
| 1349 | SLC29A1      | SLC29A1      | 1.11E-05           | 0.000196358                  | 2.54137                          | 2.54137                           | NC+MYCN up vs NC-CTRL                         | 54.8748      | 751.83        | 36.5355   | 1        |
| 1350 | FBXO4        | FBXO4        | 0.00103824         | 0.000422882                  | 2.54712                          | 2.54712                           | NC+MYCN up vs NC-CTRL                         | 15.6539      | 4.40054       | 0.74964   | 1        |
| 1351 | ALG1L7P      | ALG1L7P      | 0.00154966         | 0.00127679                   | 2.55606                          | 2.55606                           | NC+MYCN up vs NC-CTRL                         | 13.8788      | 0.24693       | 0.0474451 | 1        |
| 1352 | PRICKLE3     | PRICKLE3     | 0.0011279          | 0.00301675                   | 2.58348                          | 2.58348                           | NC+MYCN up vs NC-CTRL                         | 15.2721      | 7.01624       | 1.22511   | 1        |
| 1353 | CTC-510F12.2 | CTC-510F12.2 | 0.00934698         | 0.0107583                    | 2.61027                          | 2.61027                           | NC+MYCN up vs NC-CTRL                         | 7.77159      | 0.928174      | 0.318484  | 1        |
| 1354 | HSPA4L       | HSPA4L       | 0.0179398          | 0.00624424                   | 2.62996                          | 2.62996                           | NC+MYCN up vs NC-CTRL                         | 6.14768      | 6.59553       | 2.86093   | 1        |
| 1355 | RPL22L1      | RPL22L1      | 0.00100995         | 0.000376521                  | 2.63656                          | 2.63656                           | NC+MYCN up vs NC-CTRL                         | 15.783       | 550.561       | 93.0218   | 1        |
| 1356 | TRAP1        | TRAP1        | 0.000340028        | 9.28E-05                     | 2.64077                          | 2.64077                           | NC+MYCN up vs NC-CTRL                         | 21.6484      | 2252.54       | 277.471   | 1        |
| 1357 | SDCCAG3P2    | SDCCAG3P2    | 0.0234199          | 0.00502444                   | 2.67364                          | 2.67364                           | NC+MYCN up vs NC-CTRL                         | 5.55525      | 4.3884        | 2.10655   | 1        |
| 1358 | CTB-54D4.1   | CTB-54D4.1   | 0.0098294          | 0.00351903                   | 2.67869                          | 2.67869                           | NC+MYCN up vs NC-CTRL                         | 7.63672      | 30014.2       | 10480.7   | 1        |
| 1359 | AK7          | AK7          | 0.0135853          | 0.00691697                   | 2.68925                          | 2.68925                           | NC+MYCN up vs NC-CTRL                         | 6.8084       | 3.63635       | 1.42426   | 1        |
| 1360 | IL21R        | IL21R        | 0.000154248        | 0.000387107                  | 2.69046                          | 2.69046                           | NC+MYCN up vs NC-CTRL                         | 27.0252      | 3.61576       | 0.356778  | 1        |
| 1361 | GLRB         | GLRB         | 0.00428972         | 0.00267939                   | 2.69361                          | 2.69361                           | NC+MYCN up vs NC-CTRL                         | 10.0883      | 8.9444        | 2.3643    | 1        |
| 1362 | MYBBP1A      | MYBBP1A      | 0.0178117          | 0.0026833                    | 2.6957                           | 2.6957                            | NC+MYCN up vs NC-CTRL                         | 6.16415      | 196.822       | 85.147    | 1        |
| 1363 | AC079781.8   | AC079781.8   | 0.0059342          | 0.00797431                   | 2.71029                          | 2.71029                           | NC+MYCN up vs NC-CTRL                         | 9.06836      | 0.973139      | 0.286164  | 1        |
| 1364 | PPM1H        | PPM1H        | 0.0107414          | 0.0116954                    | 2.71383                          | 2.71383                           | NC+MYCN up vs NC-CTRL                         | 7.40299      | 10.2749       | 3.70117   | 1        |
| 1365 | FHIT         | FHIT         | 0.0013892          | 0.00097156                   | 2.7161                           | 2.7161                            | NC+MYCN up vs NC-CTRL                         | 14.3458      | 2.24514       | 0.417338  | 1        |
| 1366 | PPP1R9A      | PPP1R9A      | 0.00342218         | 0.00261022                   | 2.7294                           | 2.7294                            | NC+MYCN up vs NC-CTRL                         | 10.8485      | 21.8199       | 5.36352   | 1        |
| 1367 | RP3-337H4.9  | RP3-337H4.9  | 0.00157732         | 0.000226973                  | 2.73438                          | 2.73438                           | NC+MYCN up vs NC-CTRL                         | 13.8044      | 12.9633       | 2.5042    | 1        |
| 1368 | RP11-348F1.2 | RP11-348F1.2 | 0.002934           | 0.00373714                   | 2.75189                          | 2.75189                           | NC+MYCN up vs NC-CTRL                         | 11.3914      | 1.3497        | 0.315956  | 1        |
| 1369 | NANOGNBP3    | NANOGNBP3    | 0.0192528          | 0.0102625                    | 2.75508                          | 2.75508                           | NC+MYCN up vs NC-CTRL                         | 5.9869       | 0.241766      | 0.107687  | 1        |
| 1370 | LINC00846    | LINC00846    | 0.00781231         | 0.010938                     | 2.76696                          | 2.76696                           | NC+MYCN up vs NC-CTRL                         | 8.26615      | 0.120715      | 0.0389426 | 1        |
| 1371 | RP11-348F1.3 | RP11-348F1.3 | 0.00491242         | 0.00635943                   | 2.77032                          | 2.77032                           | NC+MYCN up vs NC-CTRL                         | 9.65225      | 0.509024      | 0.14063   | 1        |
| 1372 | FGFR4        | FGFR4        | 0.000115907        | 0.000103932                  | 2.7714                           | 2.7714                            | NC+MYCN up vs NC-CTRL                         | 29.2456      | 55.0205       | 5.01687   | 1        |
| 1373 | DDX21        | DDX21        | 0.000402272        | 0.000103805                  | 2.77251                          | 2.77251                           | NC+MYCN up vs NC-CTRL                         | 20.6355      | 5228.35       | 675.646   | 1        |
| 1374 | RP11-575L7.4 | RP11-575L7.4 | 0.0177703          | 0.00378553                   | 2.77631                          | 2.77631                           | NC+MYCN up vs NC-CTRL                         | 6.1695       | 0.101755      | 0.0439818 | 1        |
| 1375 | ACSL1        | ACSL1        | 0.00899768         | 0.00617058                   | 2.79504                          | 2.79504                           | NC+MYCN up vs NC-CTRL                         | 7.87479      | 26.9759       | 9.13495   | 1        |
| 1376 | LFNG         | LFNG         | 0.0120487          | 0.00215012                   | 2.80969                          | 2.80969                           | NC+MYCN up vs NC-CTRL                         | 7.10793      | 3.7301        | 1.39941   | 1        |

|      | Probeset ID    | Gene Symbol    | p-value(Attribute) | p-value(NC+MYCN vs. NC-CTRL) | MeanRatio(NC+MYCN N vs. NC-CTRL) | FoldChange(NC+MYCN N vs. NC-CTRL) | FoldChange(NC+MYCN vs. NC-CTRL) (Description) | F(Attribute) | SS(Attribute) | SS(Error)  | F(Error) |
|------|----------------|----------------|--------------------|------------------------------|----------------------------------|-----------------------------------|-----------------------------------------------|--------------|---------------|------------|----------|
| 1377 | ABCC4          | ABCC4          | 0.0132259          | 0.00193029                   | 2.81264                          | 2.81264                           | NC+MYCN up vs NC-CTRL                         | 6.87455      | 65.4076       | 25.3719    | 1        |
| 1378 | RP11-17E2.2    | RP11-17E2.2    | 0.00322448         | 0.00263005                   | 2.81983                          | 2.81983                           | NC+MYCN up vs NC-CTRL                         | 11.056       | 0.0405423     | 0.00977867 | 1        |
| 1379 | ERVMER34-1     | ERVMER34-1     | 0.0165581          | 0.00879586                   | 2.83438                          | 2.83438                           | NC+MYCN up vs NC-CTRL                         | 6.33352      | 3.03815       | 1.27918    | 1        |
| 1380 | CHRDL1         | CHRDL1         | 0.00398305         | 0.0036041                    | 2.83457                          | 2.83457                           | NC+MYCN up vs NC-CTRL                         | 10.3332      | 65.2308       | 16.834     | 1        |
| 1381 | HPDL           | HPDL           | 5.56E-05           | 4.70E-05                     | 2.83479                          | 2.83479                           | NC+MYCN up vs NC-CTRL                         | 35.7372      | 198.827       | 14.8362    | 1        |
| 1382 | DGCR6          | DGCR6          | 2.84E-05           | 1.52E-05                     | 2.84267                          | 2.84267                           | NC+MYCN up vs NC-CTRL                         | 42.8293      | 4.16          | 0.259012   | 1        |
| 1383 | SIK1           | SIK1           | 0.0210412          | 0.00692459                   | 2.86186                          | 2.86186                           | NC+MYCN up vs NC-CTRL                         | 5.78864      | 8.6678        | 3.99302    | 1        |
| 1384 | RP3-339A18.6   | RP3-339A18.6   | 0.0107615          | 0.00952159                   | 2.86628                          | 2.86628                           | NC+MYCN up vs NC-CTRL                         | 7.39812      | 1.21508       | 0.437977   | 1        |
| 1385 | RP1-239B22.5   | RP1-239B22.5   | 0.00891672         | 0.00289949                   | 2.8682                           | 2.8682                            | NC+MYCN up vs NC-CTRL                         | 7.89942      | 41.6574       | 14.0626    | 1        |
| 1386 | ATP8A1         | ATP8A1         | 0.000186042        | 0.000227878                  | 2.87699                          | 2.87699                           | NC+MYCN up vs NC-CTRL                         | 25.6528      | 98.4183       | 10.2308    | 1        |
| 1387 | SNX32          | SNX32          | 0.00194807         | 0.00155453                   | 2.88989                          | 2.88989                           | NC+MYCN up vs NC-CTRL                         | 12.9414      | 20.604        | 4.24558    | 1        |
| 1388 | RGS10          | RGS10          | 0.00385241         | 0.00349575                   | 2.90614                          | 2.90614                           | NC+MYCN up vs NC-CTRL                         | 10.4447      | 1862.03       | 475.399    | 1        |
| 1389 | EFCAB10        | EFCAB10        | 0.00370163         | 0.000540381                  | 2.91323                          | 2.91323                           | NC+MYCN up vs NC-CTRL                         | 10.5796      | 0.324774      | 0.0818621  | 1        |
| 1390 | FAM90A25P      | FAM90A25P      | 0.00024506         | 0.000450456                  | 2.91525                          | 2.91525                           | NC+MYCN up vs NC-CTRL                         | 23.7483      | 0.577115      | 0.0648036  | 1        |
| 1391 | RPGRIP1        | RPGRIP1        | 0.00601071         | 0.00131472                   | 2.9279                           | 2.9279                            | NC+MYCN up vs NC-CTRL                         | 9.02976      | 0.0123596     | 0.00365004 | 1        |
| 1392 | RP11-93K22.13  | RP11-93K22.13  | 0.0104274          | 0.00821267                   | 2.94896                          | 2.94896                           | NC+MYCN up vs NC-CTRL                         | 7.48058      | 1.21319       | 0.432476   | 1        |
| 1393 | PLIN5          | PLIN5          | 0.00946175         | 0.00868615                   | 2.95026                          | 2.95026                           | NC+MYCN up vs NC-CTRL                         | 7.73873      | 0.740085      | 0.255024   | 1        |
| 1394 | RP11-120M18.2  | RP11-120M18.2  | 0.000515419        | 0.000485088                  | 2.9768                           | 2.9768                            | NC+MYCN up vs NC-CTRL                         | 19.2175      | 0.0311555     | 0.00432322 | 1        |
| 1395 | NPM1P27        | NPM1P27        | 0.0107948          | 0.00375339                   | 2.98447                          | 2.98447                           | NC+MYCN up vs NC-CTRL                         | 7.39007      | 35167.5       | 12690      | 1        |
| 1396 | CLCN4          | CLCN4          | 0.0188169          | 0.00295883                   | 2.98455                          | 2.98455                           | NC+MYCN up vs NC-CTRL                         | 6.03872      | 22.7136       | 10.0302    | 1        |
| 1397 | PSEN2          | PSEN2          | 0.000784078        | 0.000117444                  | 3.00314                          | 3.00314                           | NC+MYCN up vs NC-CTRL                         | 17.0084      | 12.9044       | 2.02322    | 1        |
| 1398 | C12orf66       | C12orf66       | 0.000360799        | 6.62E-05                     | 3.0332                           | 3.0332                            | NC+MYCN up vs NC-CTRL                         | 21.2862      | 9.98164       | 1.25047    | 1        |
| 1399 | SNORA76        | SNORA76        | 0.00763962         | 0.0017925                    | 3.08183                          | 3.08183                           | NC+MYCN up vs NC-CTRL                         | 8.32934      | 9.81938       | 3.14371    | 1        |
| 1400 | CLUH           | CLUH           | 0.0021576          | 0.000391685                  | 3.10891                          | 3.10891                           | NC+MYCN up vs NC-CTRL                         | 12.5399      | 321.58        | 68.3855    | 1        |
| 1401 | ADCY4          | ADCY4          | 0.00821514         | 0.00954046                   | 3.14004                          | 3.14004                           | NC+MYCN up vs NC-CTRL                         | 8.12529      | 0.145135      | 0.0476322  | 1        |
| 1402 | RAD50          | RAD50          | 0.000135144        | 0.000107426                  | 3.14523                          | 3.14523                           | NC+MYCN up vs NC-CTRL                         | 28.0329      | 206.313       | 19.6258    | 1        |
| 1403 | CECR1          | CECR1          | 0.0193298          | 0.0107254                    | 3.16333                          | 3.16333                           | NC+MYCN up vs NC-CTRL                         | 5.9779       | 8.67327       | 3.86904    | 1        |
| 1404 | RP11-552M11.8  | RP11-552M11.8  | 0.00117123         | 0.0014033                    | 3.17601                          | 3.17601                           | NC+MYCN up vs NC-CTRL                         | 15.1009      | 56.4343       | 9.9657     | 1        |
| 1405 | RP11-227G15.2  | RP11-227G15.2  | 0.0165842          | 0.0113757                    | 3.19676                          | 3.19676                           | NC+MYCN up vs NC-CTRL                         | 6.32983      | 1.00143       | 0.42189    | 1        |
| 1406 | MAPK12         | MAPK12         | 0.00469227         | 0.00434976                   | 3.22744                          | 3.22744                           | NC+MYCN up vs NC-CTRL                         | 9.79809      | 8.86203       | 2.41191    | 1        |
| 1407 | RP11-573D15.2  | RP11-573D15.2  | 0.011053           | 0.00886643                   | 3.25725                          | 3.25725                           | NC+MYCN up vs NC-CTRL                         | 7.32873      | 0.299087      | 0.108827   | 1        |
| 1408 | RSPH1          | RSPH1          | 0.00135366         | 0.000501288                  | 3.27877                          | 3.27877                           | NC+MYCN up vs NC-CTRL                         | 14.4584      | 0.0698269     | 0.0128787  | 1        |
| 1409 | RP11-284F21.11 | RP11-284F21.11 | 0.000303803        | 0.000453641                  | 3.30815                          | 3.30815                           | NC+MYCN up vs NC-CTRL                         | 22.3513      | 4.6203        | 0.551233   | 1        |
| 1410 | RP11-1C8.6     | RP11-1C8.6     | 0.000513985        | 0.00296381                   | 3.33351                          | 3.33351                           | NC+MYCN up vs NC-CTRL                         | 19.2329      | 0.342543      | 0.047494   | 1        |
| 1411 | SLC13A3        | SLC13A3        | 0.00113048         | 0.00163879                   | 3.34005                          | 3.34005                           | NC+MYCN up vs NC-CTRL                         | 15.2617      | 8.26225       | 1.44366    | 1        |
| 1412 | RP11-804H8.6   | RP11-804H8.6   | 0.0130331          | 0.0071502                    | 3.37429                          | 3.37429                           | NC+MYCN up vs NC-CTRL                         | 6.91095      | 0.372924      | 0.143897   | 1        |
| 1413 | NCR3LG1        | NCR3LG1        | 0.00939136         | 0.00243579                   | 3.37593                          | 3.37593                           | NC+MYCN up vs NC-CTRL                         | 7.75883      | 201.367       | 69.2087    | 1        |
| 1414 | CCDC3          | CCDC3          | 0.00799136         | 0.00700541                   | 3.38071                          | 3.38071                           | NC+MYCN up vs NC-CTRL                         | 8.20245      | 1002.53       | 325.93     | 1        |
| 1415 | RP11-16P6.1    | RP11-16P6.1    | 0.000610523        | 0.00253286                   | 3.3906                           | 3.3906                            | NC+MYCN up vs NC-CTRL                         | 18.2979      | 10.6238       | 1.54827    | 1        |
| 1416 | BRSK2          | BRSK2          | 0.00745113         | 0.00647347                   | 3.40358                          | 3.40358                           | NC+MYCN up vs NC-CTRL                         | 8.40038      | 86.0139       | 27.3047    | 1        |
| 1417 | MMP23A         | MMP23A         | 0.0159553          | 0.0114876                    | 3.42015                          | 3.42015                           | NC+MYCN up vs NC-CTRL                         | 6.42076      | 2.0877        | 0.867063   | 1        |
| 1418 | RP11-690D19.3  | RP11-690D19.3  | 0.0242505          | 0.00577551                   | 3.42936                          | 3.42936                           | NC+MYCN up vs NC-CTRL                         | 5.48063      | 4.27693       | 2.08099    | 1        |
| 1419 | LINC00923      | LINC00923      | 0.00487934         | 0.0047828                    | 3.46095                          | 3.46095                           | NC+MYCN up vs NC-CTRL                         | 9.67364      | 0.100528      | 0.0277119  | 1        |

|      | Probeset ID   | Gene Symbol   | p-value(Attribute) | p-value(NC+MYCN vs. NC-CTRL) | MeanRatio(NC+MYCN N vs. NC-CTRL) | FoldChange(NC+MYCN N vs. NC-CTRL) | FoldChange(NC+MYCN vs. NC-CTRL) (Description) | F(Attribute) | SS(Attribute) | SS(Error)   | F(Error) |
|------|---------------|---------------|--------------------|------------------------------|----------------------------------|-----------------------------------|-----------------------------------------------|--------------|---------------|-------------|----------|
| 1420 | TFRC          | TFRC          | 0.00267027         | 0.000987621                  | 3.46797                          | 3.46797                           | NC+MYCN up vs NC-CTRL                         | 11.7341      | 776.559       | 176.48      | 1        |
| 1421 | ALG1L9P       | ALG1L9P       | 0.0181421          | 0.0113759                    | 3.49211                          | 3.49211                           | NC+MYCN up vs NC-CTRL                         | 6.12196      | 2.97033       | 1.29385     | 1        |
| 1422 | RNF125        | RNF125        | 5.86E-06           | 7.98E-06                     | 3.55077                          | 3.55077                           | NC+MYCN up vs NC-CTRL                         | 64.954       | 4.82216       | 0.197972    | 1        |
| 1423 | CCDC73        | CCDC73        | 0.00198775         | 0.000960968                  | 3.56255                          | 3.56255                           | NC+MYCN up vs NC-CTRL                         | 12.8614      | 0.00417137    | 0.000864888 | 1        |
| 1424 | TSPO          | TSPO          | 0.0053548          | 0.000983566                  | 3.57843                          | 3.57843                           | NC+MYCN up vs NC-CTRL                         | 9.38241      | 98.0113       | 27.8568     | 1        |
| 1425 | RPS27AP3      | RPS27AP3      | 0.00456362         | 0.0107116                    | 3.60338                          | 3.60338                           | NC+MYCN up vs NC-CTRL                         | 9.88734      | 0.0842373     | 0.0227192   | 1        |
| 1426 | ARHGEF4       | ARHGEF4       | 0.0024847          | 0.000708205                  | 3.60475                          | 3.60475                           | NC+MYCN up vs NC-CTRL                         | 12.0015      | 3.63003       | 0.80657     | 1        |
| 1427 | TNK2-AS1      | TNK2-AS1      | 0.00125349         | 0.00269454                   | 3.6272                           | 3.6272                            | NC+MYCN up vs NC-CTRL                         | 14.7968      | 0.0403162     | 0.00726577  | 1        |
| 1428 | RP11-166P13.4 | RP11-166P13.4 | 0.00749463         | 0.00453488                   | 3.64898                          | 3.64898                           | NC+MYCN up vs NC-CTRL                         | 8.38379      | 0.00377592    | 0.00120102  | 1        |
| 1429 | RP4-785G19.5  | RP4-785G19.5  | 0.00232881         | 0.00131675                   | 3.65008                          | 3.65008                           | NC+MYCN up vs NC-CTRL                         | 12.2463      | 4.6589        | 1.01449     | 1        |
| 1430 | PLS1          | PLS1          | 0.00212661         | 0.000299465                  | 3.69783                          | 3.69783                           | NC+MYCN up vs NC-CTRL                         | 12.5961      | 14.2549       | 3.01785     | 1        |
| 1431 | NOG           | NOG           | 0.000264679        | 0.000269308                  | 3.70134                          | 3.70134                           | NC+MYCN up vs NC-CTRL                         | 23.239       | 8.55188       | 0.981327    | 1        |
| 1432 | TPPP          | TPPP          | 0.00261397         | 0.00216661                   | 3.71582                          | 3.71582                           | NC+MYCN up vs NC-CTRL                         | 11.8127      | 3.66714       | 0.827843    | 1        |
| 1433 | MMEL1         | MMEL1         | 0.0140405          | 0.00981618                   | 3.71935                          | 3.71935                           | NC+MYCN up vs NC-CTRL                         | 6.72769      | 0.447811      | 0.1775      | 1        |
| 1434 | PPARGC1B      | PPARGC1B      | 1.10E-05           | 9.05E-06                     | 3.73034                          | 3.73034                           | NC+MYCN up vs NC-CTRL                         | 54.9975      | 16.4523       | 0.797724    | 1        |
| 1435 | RNF128        | RNF128        | 0.008696           | 0.00860719                   | 3.73097                          | 3.73097                           | NC+MYCN up vs NC-CTRL                         | 7.96802      | 0.0026913     | 0.000900701 | 1        |
| 1436 | LECT1         | LECT1         | 0.000543529        | 0.000704136                  | 3.73235                          | 3.73235                           | NC+MYCN up vs NC-CTRL                         | 18.9249      | 0.135313      | 0.0190666   | 1        |
| 1437 | SLC46A3       | SLC46A3       | 0.00775659         | 0.0045815                    | 3.81983                          | 3.81983                           | NC+MYCN up vs NC-CTRL                         | 8.28635      | 0.0627707     | 0.0202005   | 1        |
| 1438 | OVGP1         | OVGP1         | 0.00584807         | 0.00429999                   | 3.83832                          | 3.83832                           | NC+MYCN up vs NC-CTRL                         | 9.11256      | 24.2298       | 7.09051     | 1        |
| 1439 | AC005682.7    | AC005682.7    | 0.000409912        | 0.000154575                  | 3.84231                          | 3.84231                           | NC+MYCN up vs NC-CTRL                         | 20.5247      | 2.70361       | 0.351265    | 1        |
| 1440 | HSBP1L1       | HSBP1L1       | 0.0024571          | 0.00150511                   | 3.84662                          | 3.84662                           | NC+MYCN up vs NC-CTRL                         | 12.0435      | 8.82523       | 1.95408     | 1        |
| 1441 | OCA2          | OCA2          | 0.0103187          | 0.00652403                   | 3.85245                          | 3.85245                           | NC+MYCN up vs NC-CTRL                         | 7.5081       | 4.32974       | 1.5378      | 1        |
| 1442 | SMYD1         | SMYD1         | 0.000269968        | 0.000323754                  | 3.99789                          | 3.99789                           | NC+MYCN up vs NC-CTRL                         | 23.1097      | 0.04978       | 0.0057442   | 1        |
| 1443 | C3AR1         | C3AR1         | 0.000952483        | 0.00599332                   | 4.00078                          | 4.00078                           | NC+MYCN up vs NC-CTRL                         | 16.0597      | 0.0151458     | 0.0025149   | 1        |
| 1444 | RGS16         | RGS16         | 0.021496           | 0.00761292                   | 4.0168                           | 4.0168                            | NC+MYCN up vs NC-CTRL                         | 5.74155      | 103.473       | 48.0581     | 1        |
| 1445 | AC018470.4    | AC018470.4    | 0.00774203         | 0.00497474                   | 4.03703                          | 4.03703                           | NC+MYCN up vs NC-CTRL                         | 8.29166      | 0.00286154    | 0.000920295 | 1        |
| 1446 | ADAM11        | ADAM11        | 0.0118911          | 0.00442914                   | 4.04229                          | 4.04229                           | NC+MYCN up vs NC-CTRL                         | 7.14134      | 96.2319       | 35.9342     | 1        |
| 1447 | PFKP          | PFKP          | 0.000112363        | 0.00241757                   | 4.04927                          | 4.04927                           | NC+MYCN up vs NC-CTRL                         | 29.4965      | 658.01        | 59.4881     | 1        |
| 1448 | RP11-255A11.4 | RP11-255A11.4 | 0.00868935         | 0.00764258                   | 4.06534                          | 4.06534                           | NC+MYCN up vs NC-CTRL                         | 7.97012      | 0.0815699     | 0.0272919   | 1        |
| 1449 | AC003087.4    | AC003087.4    | 0.0086358          | 0.00759095                   | 4.06936                          | 4.06936                           | NC+MYCN up vs NC-CTRL                         | 7.98711      | 0.0158666     | 0.00529741  | 1        |
| 1450 | LINC00492     | LINC00492     | 0.00863581         | 0.00759095                   | 4.06936                          | 4.06936                           | NC+MYCN up vs NC-CTRL                         | 7.9871       | 0.0120603     | 0.00402657  | 1        |
| 1451 | RP11-456O19.2 | RP11-456O19.2 | 0.00328413         | 0.00261564                   | 4.07431                          | 4.07431                           | NC+MYCN up vs NC-CTRL                         | 10.9917      | 0.0919076     | 0.0222974   | 1        |
| 1452 | CKB           | CKB           | 0.0203781          | 0.00369644                   | 4.09387                          | 4.09387                           | NC+MYCN up vs NC-CTRL                         | 5.85961      | 8883.43       | 4042.78     | 1        |
| 1453 | TMEM52        | TMEM52        | 0.000214556        | 0.000105065                  | 4.14853                          | 4.14853                           | NC+MYCN up vs NC-CTRL                         | 24.6508      | 8.19235       | 0.886229    | 1        |
| 1454 | EFCAB4A       | EFCAB4A       | 0.00912324         | 0.00161789                   | 4.21854                          | 4.21854                           | NC+MYCN up vs NC-CTRL                         | 7.83713      | 1.07593       | 0.366097    | 1        |
| 1455 | RBM24         | RBM24         | 0.0133831          | 0.00390072                   | 4.24522                          | 4.24522                           | NC+MYCN up vs NC-CTRL                         | 6.84535      | 0.845199      | 0.329255    | 1        |
| 1456 | ZDHHC11B      | ZDHHC11B      | 0.00522427         | 0.00147472                   | 4.27486                          | 4.27486                           | NC+MYCN up vs NC-CTRL                         | 9.45905      | 26.9671       | 7.60247     | 1        |
| 1457 | VPREB3        | VPREB3        | 0.00298814         | 0.00239229                   | 4.29965                          | 4.29965                           | NC+MYCN up vs NC-CTRL                         | 11.3258      | 0.996727      | 0.234679    | 1        |
| 1458 | RP11-132A1.3  | RP11-132A1.3  | 4.75E-05           | 5.31E-05                     | 4.37178                          | 4.37178                           | NC+MYCN up vs NC-CTRL                         | 37.2988      | 0.0795051     | 0.00568419  | 1        |
| 1459 | RP11-388C12.1 | RP11-388C12.1 | 0.0222894          | 0.00448151                   | 4.37249                          | 4.37249                           | NC+MYCN up vs NC-CTRL                         | 5.6623       | 0.0339315     | 0.0159801   | 1        |
| 1460 | P4HTM         | P4HTM         | 0.014038           | 0.00606091                   | 4.4795                           | 4.4795                            | NC+MYCN up vs NC-CTRL                         | 6.72812      | 1.62498       | 0.644057    | 1        |
| 1461 | SNX18P3       | SNX18P3       | 0.00156891         | 0.000552718                  | 4.48825                          | 4.48825                           | NC+MYCN up vs NC-CTRL                         | 13.8268      | 3.02551       | 0.583505    | 1        |
| 1462 | RP11-222G7.2  | RP11-222G7.2  | 0.000713584        | 0.000673475                  | 4.50523                          | 4.50523                           | NC+MYCN up vs NC-CTRL                         | 17.4845      | 0.0801657     | 0.0122266   | 1        |

|      | Probeset ID    | Gene Symbol    | p-value(Attribute) | p-value(NC+MYCN vs. NC-CTRL) | MeanRatio(NC+MYCN N vs. NC-CTRL) | FoldChange(NC+MYCN N vs. NC-CTRL) | FoldChange(NC+MYCN vs. NC-CTRL) (Description) | F(Attribute) | SS(Attribute) | SS(Error)   | F(Error) |
|------|----------------|----------------|--------------------|------------------------------|----------------------------------|-----------------------------------|-----------------------------------------------|--------------|---------------|-------------|----------|
| 1463 | TRPC5OS        | TRPC5OS        | 0.000712054        | 0.000671674                  | 4.50742                          | 4.50742                           | NC+MYCN up vs NC-CTRL                         | 17.4955      | 0.00276389    | 0.000421273 | 1        |
| 1464 | INHBE          | INHBE          | 0.00934111         | 0.00514356                   | 4.51847                          | 4.51847                           | NC+MYCN up vs NC-CTRL                         | 7.77329      | 5.42745       | 1.86192     | 1        |
| 1465 | AMIGO1         | AMIGO1         | 4.47E-06           | 2.61E-06                     | 4.56384                          | 4.56384                           | NC+MYCN up vs NC-CTRL                         | 69.6926      | 2.12001       | 0.0811184   | 1        |
| 1466 | COL6A4P1       | COL6A4P1       | 0.0208714          | 0.0102164                    | 4.58826                          | 4.58826                           | NC+MYCN up vs NC-CTRL                         | 5.80654      | 0.000905296   | 0.000415759 | 1        |
| 1467 | RP11-52A20.2   | RP11-52A20.2   | 0.00102171         | 0.000470064                  | 4.62474                          | 4.62474                           | NC+MYCN up vs NC-CTRL                         | 15.7288      | 0.032479      | 0.00550652  | 1        |
| 1468 | ATP13A5        | ATP13A5        | 0.0107037          | 0.00530141                   | 4.64127                          | 4.64127                           | NC+MYCN up vs NC-CTRL                         | 7.41215      | 0.0365558     | 0.0131517   | 1        |
| 1469 | CTC-246B18.8   | CTC-246B18.8   | 0.00288597         | 0.0005204                    | 4.65131                          | 4.65131                           | NC+MYCN up vs NC-CTRL                         | 11.4509      | 3.55034       | 0.826797    | 1        |
| 1470 | WFDC1          | WFDC1          | 0.000230788        | 0.000213976                  | 4.68612                          | 4.68612                           | NC+MYCN up vs NC-CTRL                         | 24.152       | 2.54359       | 0.280843    | 1        |
| 1471 | ATP2A3         | ATP2A3         | 0.0136486          | 0.007812                     | 4.85313                          | 4.85313                           | NC+MYCN up vs NC-CTRL                         | 6.79697      | 49.3372       | 19.3565     | 1        |
| 1472 | FAM83H-AS1     | FAM83H-AS1     | 0.01566            | 0.00932109                   | 4.89189                          | 4.89189                           | NC+MYCN up vs NC-CTRL                         | 6.46501      | 0.714104      | 0.294551    | 1        |
| 1473 | ADCK3          | ADCK3          | 8.63E-05           | 0.000468753                  | 4.93018                          | 4.93018                           | NC+MYCN up vs NC-CTRL                         | 31.7126      | 44.4748       | 3.73983     | 1        |
| 1474 | ODF3           | ODF3           | 0.0174628          | 0.0116123                    | 4.93559                          | 4.93559                           | NC+MYCN up vs NC-CTRL                         | 6.20976      | 0.000703348   | 0.00030204  | 1        |
| 1475 | RP11-700F16.3  | RP11-700F16.3  | 0.0164773          | 0.0109456                    | 4.97147                          | 4.97147                           | NC+MYCN up vs NC-CTRL                         | 6.34499      | 0.073657      | 0.0309565   | 1        |
| 1476 | ME3            | ME3            | 2.74E-07           | 1.97E-05                     | 4.98399                          | 4.98399                           | NC+MYCN up vs NC-CTRL                         | 143.062      | 2.90918       | 0.0542268   | 1        |
| 1477 | ADPRHL1        | ADPRHL1        | 0.00353176         | 0.00061589                   | 5.02438                          | 5.02438                           | NC+MYCN up vs NC-CTRL                         | 10.7399      | 7.7628        | 1.92747     | 1        |
| 1478 | TSPAN13        | TSPAN13        | 0.0022181          | 0.00039734                   | 5.06763                          | 5.06763                           | NC+MYCN up vs NC-CTRL                         | 12.4329      | 900.651       | 193.176     | 1        |
| 1479 | RP4-710M16.1   | RP4-710M16.1   | 0.0184299          | 0.0104756                    | 5.07477                          | 5.07477                           | NC+MYCN up vs NC-CTRL                         | 6.086        | 0.00818257    | 0.00358531  | 1        |
| 1480 | RP11-902B17.1  | RP11-902B17.1  | 0.0160068          | 0.0104702                    | 5.07526                          | 5.07526                           | NC+MYCN up vs NC-CTRL                         | 6.41315      | 0.000290122   | 0.000120636 | 1        |
| 1481 | CTD-2318B16.2  | CTD-2318B16.2  | 0.0159579          | 0.0104321                    | 5.08028                          | 5.08028                           | NC+MYCN up vs NC-CTRL                         | 6.42038      | 0.0111704     | 0.00463956  | 1        |
| 1482 | PPP1R1B        | PPP1R1B        | 2.93E-05           | 1.36E-05                     | 5.08482                          | 5.08482                           | NC+MYCN up vs NC-CTRL                         | 42.4518      | 0.0478302     | 0.00300452  | 1        |
| 1483 | RP4-734G22.3   | RP4-734G22.3   | 0.00357626         | 0.000795645                  | 5.15252                          | 5.15252                           | NC+MYCN up vs NC-CTRL                         | 10.697       | 0.0182295     | 0.00454446  | 1        |
| 1484 | N4BP3          | N4BP3          | 0.00020974         | 5.37E-05                     | 5.15292                          | 5.15292                           | NC+MYCN up vs NC-CTRL                         | 24.8079      | 1.2169        | 0.130808    | 1        |
| 1485 | SNORD102       | SNORD102       | 0.00401518         | 0.000849171                  | 5.29607                          | 5.29607                           | NC+MYCN up vs NC-CTRL                         | 10.3064      | 86.4504       | 22.3681     | 1        |
| 1486 | JPH1           | JPH1           | 7.31E-05           | 2.11E-05                     | 5.33681                          | 5.33681                           | NC+MYCN up vs NC-CTRL                         | 33.1733      | 22.7195       | 1.82633     | 1        |
| 1487 | BSND           | BSND           | 0.00182324         | 0.00132306                   | 5.39073                          | 5.39073                           | NC+MYCN up vs NC-CTRL                         | 13.2073      | 0.00590761    | 0.0011928   | 1        |
| 1488 | RP11-297D21.2  | RP11-297D21.2  | 0.00985698         | 0.0050022                    | 5.42571                          | 5.42571                           | NC+MYCN up vs NC-CTRL                         | 7.62926      | 0.287288      | 0.100416    | 1        |
| 1489 | CCDC169        | CCDC169        | 0.00186517         | 0.000343647                  | 5.44857                          | 5.44857                           | NC+MYCN up vs NC-CTRL                         | 13.1155      | 5.42638       | 1.1033      | 1        |
| 1490 | ITGA7          | ITGA7          | 0.012458           | 0.00570654                   | 5.48041                          | 5.48041                           | NC+MYCN up vs NC-CTRL                         | 7.02368      | 81.6249       | 30.9904     | 1        |
| 1491 | VPS9D1-AS1     | VPS9D1-AS1     | 0.00434508         | 0.000690865                  | 5.49081                          | 5.49081                           | NC+MYCN up vs NC-CTRL                         | 10.0464      | 106.107       | 28.1644     | 1        |
| 1492 | TAF4B          | TAF4B          | 0.000227926        | 3.09E-05                     | 5.49631                          | 5.49631                           | NC+MYCN up vs NC-CTRL                         | 24.2367      | 30.0051       | 3.30134     | 1        |
| 1493 | RP3-395M20.12  | RP3-395M20.12  | 0.0136156          | 0.00315635                   | 5.53133                          | 5.53133                           | NC+MYCN up vs NC-CTRL                         | 6.80291      | 0.282047      | 0.110559    | 1        |
| 1494 | DCAF4          | DCAF4          | 8.63E-06           | 1.76E-06                     | 5.56286                          | 5.56286                           | NC+MYCN up vs NC-CTRL                         | 58.6798      | 27.2133       | 1.23669     | 1        |
| 1495 | CACNA1A        | CACNA1A        | 0.00754307         | 0.00381498                   | 5.56923                          | 5.56923                           | NC+MYCN up vs NC-CTRL                         | 8.36545      | 3.00689       | 0.958509    | 1        |
| 1496 | FAM47E-STBD1   | FAM47E-STBD1   | 0.0158131          | 0.0116808                    | 5.60796                          | 5.60796                           | NC+MYCN up vs NC-CTRL                         | 6.44194      | 1.16589       | 0.482624    | 1        |
| 1497 | RTN4RL1        | RTN4RL1        | 8.76E-06           | 5.32E-06                     | 5.6277                           | 5.6277                            | NC+MYCN up vs NC-CTRL                         | 58.4595      | 37.0225       | 1.6888      | 1        |
| 1498 | AC002400.1     | AC002400.1     | 0.00808944         | 0.00344002                   | 5.6619                           | 5.6619                            | NC+MYCN up vs NC-CTRL                         | 8.1683       | 0.132616      | 0.0432946   | 1        |
| 1499 | AC116614.1     | AC116614.1     | 0.00436371         | 0.00139839                   | 5.77115                          | 5.77115                           | NC+MYCN up vs NC-CTRL                         | 10.0324      | 6.6236        | 1.76058     | 1        |
| 1500 | WWC1           | WWC1           | 0.00336234         | 0.000704056                  | 5.81289                          | 5.81289                           | NC+MYCN up vs NC-CTRL                         | 10.9097      | 7.08232       | 1.73114     | 1        |
| 1501 | PHYHIP         | PHYHIP         | 0.00291381         | 0.00055767                   | 5.86503                          | 5.86503                           | NC+MYCN up vs NC-CTRL                         | 11.4163      | 4.59771       | 1.07396     | 1        |
| 1502 | EFCAB4B        | EFCAB4B        | 0.00839701         | 0.00200609                   | 5.88958                          | 5.88958                           | NC+MYCN up vs NC-CTRL                         | 8.06449      | 0.0850209     | 0.0281137   | 1        |
| 1503 | RP11-1149O23.2 | RP11-1149O23.2 | 0.000318083        | 0.000145728                  | 5.91049                          | 5.91049                           | NC+MYCN up vs NC-CTRL                         | 22.0623      | 0.741294      | 0.0896001   | 1        |
| 1504 | PVRL4          | PVRL4          | 0.0108666          | 0.0081111                    | 5.94443                          | 5.94443                           | NC+MYCN up vs NC-CTRL                         | 7.37284      | 0.0035877     | 0.00129763  | 1        |
| 1505 | GALNT16        | GALNT16        | 0.000152061        | 3.92E-05                     | 6.02234                          | 6.02234                           | NC+MYCN up vs NC-CTRL                         | 27.1325      | 39.3114       | 3.86365     | 1        |

|      | Probeset ID    | Gene Symbol    | p-value(Attribute) | p-value(NC+MYCN vs. NC-CTRL) | MeanRatio(NC+MYCN N vs. NC-CTRL) | FoldChange(NC+MYCN N vs. NC-CTRL) | FoldChange(NC+MYCN vs. NC-CTRL) (Description) | F(Attribute) | SS(Attribute) | SS(Error)   | F(Error) |
|------|----------------|----------------|--------------------|------------------------------|----------------------------------|-----------------------------------|-----------------------------------------------|--------------|---------------|-------------|----------|
| 1506 | MYO1H          | MYO1H          | 0.011692           | 0.00207311                   | 6.06135                          | 6.06135                           | NC+MYCN up vs NC-CTRL                         | 7.18433      | 0.0139835     | 0.00519035  | 1        |
| 1507 | RP11-277L2.5   | RP11-277L2.5   | 0.00507356         | 0.00273985                   | 6.07684                          | 6.07684                           | NC+MYCN up vs NC-CTRL                         | 9.55057      | 1.02127       | 0.285156    | 1        |
| 1508 | TDGF1          | TDGF1          | 0.0080609          | 0.00481185                   | 6.08613                          | 6.08613                           | NC+MYCN up vs NC-CTRL                         | 8.17819      | 0.0004        | 0.000130428 | 1        |
| 1509 | AF186192.6     | AF186192.6     | 0.0149882          | 0.00274644                   | 6.10138                          | 6.10138                           | NC+MYCN up vs NC-CTRL                         | 6.56966      | 0.0297055     | 0.0120577   | 1        |
| 1510 | TNFRSF10A      | TNFRSF10A      | 0.00101518         | 0.000410788                  | 6.11397                          | 6.11397                           | NC+MYCN up vs NC-CTRL                         | 15.7588      | 2.65094       | 0.448587    | 1        |
| 1511 | AC008948.1     | AC008948.1     | 0.0160888          | 0.0078495                    | 6.11652                          | 6.11652                           | NC+MYCN up vs NC-CTRL                         | 6.40109      | 4.14945       | 1.72864     | 1        |
| 1512 | TFF3           | TFF3           | 0.00914745         | 0.00539527                   | 6.11759                          | 6.11759                           | NC+MYCN up vs NC-CTRL                         | 7.82994      | 0.00750091    | 0.00255461  | 1        |
| 1513 | RP5-1173A5.1   | RP5-1173A5.1   | 0.00916396         | 0.00540406                   | 6.11808                          | 6.11808                           | NC+MYCN up vs NC-CTRL                         | 7.82505      | 0.0165794     | 0.00565003  | 1        |
| 1514 | JAG2           | JAG2           | 0.0135834          | 0.00527598                   | 6.25903                          | 6.25903                           | NC+MYCN up vs NC-CTRL                         | 6.80874      | 7.59433       | 2.97435     | 1        |
| 1515 | SYT2           | SYT2           | 0.0125714          | 0.0034274                    | 6.28828                          | 6.28828                           | NC+MYCN up vs NC-CTRL                         | 7.00094      | 1.9305        | 0.735331    | 1        |
| 1516 | NAAA           | NAAA           | 0.000687222        | 0.000105373                  | 6.34418                          | 6.34418                           | NC+MYCN up vs NC-CTRL                         | 17.6779      | 1.95707       | 0.295219    | 1        |
| 1517 | CHRD           | CHRD           | 0.00769834         | 0.00332453                   | 6.49443                          | 6.49443                           | NC+MYCN up vs NC-CTRL                         | 8.30766      | 1.36551       | 0.438312    | 1        |
| 1518 | SOHLH2         | SOHLH2         | 0.0102606          | 0.00208661                   | 6.49591                          | 6.49591                           | NC+MYCN up vs NC-CTRL                         | 7.52297      | 1.6591        | 0.5881      | 1        |
| 1519 | CAMKK1         | CAMKK1         | 0.000864257        | 0.000132123                  | 6.52059                          | 6.52059                           | NC+MYCN up vs NC-CTRL                         | 16.5279      | 1.78374       | 0.287794    | 1        |
| 1520 | TERT           | TERT           | 0.00458013         | 0.000631981                  | 6.63787                          | 6.63787                           | NC+MYCN up vs NC-CTRL                         | 9.87572      | 10.4623       | 2.82507     | 1        |
| 1521 | KY             | KY             | 0.0141087          | 0.00597986                   | 6.75271                          | 6.75271                           | NC+MYCN up vs NC-CTRL                         | 6.71588      | 1.85905       | 0.738169    | 1        |
| 1522 | SMIM10         | SMIM10         | 7.22E-05           | 2.32E-05                     | 6.79648                          | 6.79648                           | NC+MYCN up vs NC-CTRL                         | 33.2892      | 110.023       | 8.81355     | 1        |
| 1523 | RAPGEF5        | RAPGEF5        | 0.000109807        | 0.000203114                  | 6.90458                          | 6.90458                           | NC+MYCN up vs NC-CTRL                         | 29.6838      | 20.2824       | 1.82208     | 1        |
| 1524 | LAD1           | LAD1           | 0.0187725          | 0.00977856                   | 6.9294                           | 6.9294                            | NC+MYCN up vs NC-CTRL                         | 6.04408      | 0.126446      | 0.0557885   | 1        |
| 1525 | RP11-196E1.3   | RP11-196E1.3   | 0.00296407         | 0.00123203                   | 6.94398                          | 6.94398                           | NC+MYCN up vs NC-CTRL                         | 11.3548      | 0.0150862     | 0.00354297  | 1        |
| 1526 | RP11-540K16.1  | RP11-540K16.1  | 0.0226699          | 0.0115259                    | 7.09633                          | 7.09633                           | NC+MYCN up vs NC-CTRL                         | 5.62553      | 0.0312765     | 0.014826    | 1        |
| 1527 | ARHGAP9        | ARHGAP9        | 0.0199423          | 0.00418259                   | 7.4548                           | 7.4548                            | NC+MYCN up vs NC-CTRL                         | 5.90785      | 0.189115      | 0.0853623   | 1        |
| 1528 | AC095067.1     | AC095067.1     | 0.0146597          | 0.00731279                   | 7.73901                          | 7.73901                           | NC+MYCN up vs NC-CTRL                         | 6.62299      | 0.0201196     | 0.00810093  | 1        |
| 1529 | AC008738.1     | AC008738.1     | 0.0150887          | 0.00316903                   | 7.76933                          | 7.76933                           | NC+MYCN up vs NC-CTRL                         | 6.55364      | 0.243908      | 0.0992458   | 1        |
| 1530 | FAM83G         | FAM83G         | 0.00197601         | 0.00485154                   | 7.88657                          | 7.88657                           | NC+MYCN up vs NC-CTRL                         | 12.8849      | 0.51141       | 0.105842    | 1        |
| 1531 | MAPK15         | MAPK15         | 0.00627128         | 0.0016558                    | 8.017                            | 8.017                             | NC+MYCN up vs NC-CTRL                         | 8.90275      | 82.0822       | 24.5863     | 1        |
| 1532 | RP1-266L20.4   | RP1-266L20.4   | 0.0142292          | 0.00489631                   | 8.1014                           | 8.1014                            | NC+MYCN up vs NC-CTRL                         | 6.69519      | 0.144058      | 0.0573776   | 1        |
| 1533 | RP11-392E22.12 | RP11-392E22.12 | 0.00538931         | 0.00131864                   | 8.25544                          | 8.25544                           | NC+MYCN up vs NC-CTRL                         | 9.36254      | 1.01709       | 0.28969     | 1        |
| 1534 | USP2-AS1       | USP2-AS1       | 0.000578974        | 0.000101035                  | 8.53149                          | 8.53149                           | NC+MYCN up vs NC-CTRL                         | 18.5818      | 0.377714      | 0.0542055   | 1        |
| 1535 | SLC16A10       | SLC16A10       | 8.24E-05           | 0.00013893                   | 9.29032                          | 9.29032                           | NC+MYCN up vs NC-CTRL                         | 32.1125      | 2.38693       | 0.198214    | 1        |
| 1536 | SLCO4A1        | SLCO4A1        | 0.00301924         | 0.0005719                    | 9.3115                           | 9.3115                            | NC+MYCN up vs NC-CTRL                         | 11.2888      | 40.633        | 9.5984      | 1        |
| 1537 | SLC25A48       | SLC25A48       | 0.0065478          | 0.00218235                   | 9.41624                          | 9.41624                           | NC+MYCN up vs NC-CTRL                         | 8.77499      | 0.0145257     | 0.00441427  | 1        |
| 1538 | LRRRC15        | LRRRC15        | 0.000409684        | 0.000537498                  | 9.48361                          | 9.48361                           | NC+MYCN up vs NC-CTRL                         | 20.528       | 0.00864441    | 0.00112294  | 1        |
| 1539 | CDH15          | CDH15          | 0.0222956          | 0.00990864                   | 9.61845                          | 9.61845                           | NC+MYCN up vs NC-CTRL                         | 5.66169      | 26.7132       | 12.582      | 1        |
| 1540 | PRR18          | PRR18          | 0.000168911        | 4.60E-05                     | 9.75303                          | 9.75303                           | NC+MYCN up vs NC-CTRL                         | 26.3522      | 0.0738997     | 0.00747815  | 1        |
| 1541 | TTL2           | TTL2           | 0.00100952         | 0.000219434                  | 9.77402                          | 9.77402                           | NC+MYCN up vs NC-CTRL                         | 15.785       | 0.386371      | 0.0652723   | 1        |
| 1542 | DLL1           | DLL1           | 0.0228526          | 0.00887896                   | 9.81265                          | 9.81265                           | NC+MYCN up vs NC-CTRL                         | 5.60815      | 14.5125       | 6.90067     | 1        |
| 1543 | CASZ1          | CASZ1          | 0.0024452          | 0.000407183                  | 9.90073                          | 9.90073                           | NC+MYCN up vs NC-CTRL                         | 12.0617      | 1.81599       | 0.401488    | 1        |
| 1544 | EPCAM          | EPCAM          | 0.0148871          | 0.00372592                   | 9.94404                          | 9.94404                           | NC+MYCN up vs NC-CTRL                         | 6.58593      | 0.921459      | 0.373102    | 1        |
| 1545 | SMOC2          | SMOC2          | 0.00854488         | 0.00261087                   | 10.0537                          | 10.0537                           | NC+MYCN up vs NC-CTRL                         | 8.01625      | 0.780277      | 0.259565    | 1        |
| 1546 | C10orf71       | C10orf71       | 0.000901608        | 0.000430337                  | 10.266                           | 10.266                            | NC+MYCN up vs NC-CTRL                         | 16.3227      | 1.46283       | 0.238984    | 1        |
| 1547 | SEC14L5        | SEC14L5        | 7.58E-05           | 3.72E-05                     | 10.3624                          | 10.3624                           | NC+MYCN up vs NC-CTRL                         | 32.8539      | 7.69992       | 0.624983    | 1        |
| 1548 | FGF9           | FGF9           | 0.000210709        | 0.000100369                  | 10.5186                          | 10.5186                           | NC+MYCN up vs NC-CTRL                         | 24.776       | 0.549965      | 0.0591934   | 1        |

|      | Probeset ID     | Gene Symbol     | p-value(Attribute) | p-value(NC+MYCN vs. NC-CTRL) | MeanRatio(NC+MYCN N vs. NC-CTRL) | FoldChange(NC+MYCN N vs. NC-CTRL) | FoldChange(NC+MYCN vs. NC-CTRL) (Description) | F(Attribute) | SS(Attribute) | SS(Error)   | F(Error) |
|------|-----------------|-----------------|--------------------|------------------------------|----------------------------------|-----------------------------------|-----------------------------------------------|--------------|---------------|-------------|----------|
| 1549 | ARL9            | ARL9            | 1.57E-07           | 6.55E-08                     | 10.5276                          | 10.5276                           | NC+MYCN up vs NC-CTRL                         | 164.955      | 7.62619       | 0.123285    | 1        |
| 1550 | ACSM4           | ACSM4           | 1.11E-05           | 0.00387697                   | 10.5347                          | 10.5347                           | NC+MYCN up vs NC-CTRL                         | 54.9555      | 0.147405      | 0.00715269  | 1        |
| 1551 | LCN10           | LCN10           | 0.00398783         | 0.00183902                   | 10.5649                          | 10.5649                           | NC+MYCN up vs NC-CTRL                         | 10.3292      | 0.00176886    | 0.000456665 | 1        |
| 1552 | SMTNL2          | SMTNL2          | 0.000318137        | 0.000108305                  | 10.5815                          | 10.5815                           | NC+MYCN up vs NC-CTRL                         | 22.0613      | 15.9945       | 1.93334     | 1        |
| 1553 | CD7             | CD7             | 0.0146115          | 0.00257847                   | 10.7608                          | 10.7608                           | NC+MYCN up vs NC-CTRL                         | 6.63095      | 0.0295225     | 0.0118726   | 1        |
| 1554 | PDE4A           | PDE4A           | 0.0140311          | 0.00229509                   | 10.803                           | 10.803                            | NC+MYCN up vs NC-CTRL                         | 6.72933      | 2.93778       | 1.16417     | 1        |
| 1555 | CD55            | CD55            | 0.00010185         | 4.15E-05                     | 10.9973                          | 10.9973                           | NC+MYCN up vs NC-CTRL                         | 30.3034      | 14.5647       | 1.28168     | 1        |
| 1556 | CTD-3148I10.1   | CTD-3148I10.1   | 0.0236613          | 0.0100855                    | 11.0343                          | 11.0343                           | NC+MYCN up vs NC-CTRL                         | 5.53323      | 0.0411374     | 0.0198256   | 1        |
| 1557 | CACNA2D4        | CACNA2D4        | 0.000545371        | 0.000204761                  | 11.134                           | 11.134                            | NC+MYCN up vs NC-CTRL                         | 18.9064      | 0.0585053     | 0.00825193  | 1        |
| 1558 | DPP4            | DPP4            | 0.0047892          | 0.00159813                   | 11.3399                          | 11.3399                           | NC+MYCN up vs NC-CTRL                         | 9.73285      | 5.17604       | 1.41816     | 1        |
| 1559 | BMP6            | BMP6            | 0.0037408          | 0.00150145                   | 11.4017                          | 11.4017                           | NC+MYCN up vs NC-CTRL                         | 10.5439      | 0.0430011     | 0.0108755   | 1        |
| 1560 | RP11-132A1.4    | RP11-132A1.4    | 0.00166248         | 0.000725424                  | 11.4501                          | 11.4501                           | NC+MYCN up vs NC-CTRL                         | 13.5852      | 127.179       | 24.9642     | 1        |
| 1561 | TMEM158         | TMEM158         | 0.0189035          | 0.00541937                   | 11.5816                          | 11.5816                           | NC+MYCN up vs NC-CTRL                         | 6.02831      | 25.6939       | 11.3659     | 1        |
| 1562 | CPNE7           | CPNE7           | 0.00745599         | 0.0021708                    | 12.2816                          | 12.2816                           | NC+MYCN up vs NC-CTRL                         | 8.39852      | 12.6003       | 4.00079     | 1        |
| 1563 | ALPL            | ALPL            | 6.10E-05           | 1.61E-05                     | 12.3331                          | 12.3331                           | NC+MYCN up vs NC-CTRL                         | 34.8572      | 34.7199       | 2.65616     | 1        |
| 1564 | B4GALNT3        | B4GALNT3        | 0.00753896         | 0.00152409                   | 12.4012                          | 12.4012                           | NC+MYCN up vs NC-CTRL                         | 8.367        | 14.7451       | 4.69946     | 1        |
| 1565 | MAFA            | MAFA            | 0.00014955         | 6.25E-05                     | 12.6933                          | 12.6933                           | NC+MYCN up vs NC-CTRL                         | 27.258       | 0.731132      | 0.0715271   | 1        |
| 1566 | CTAGE13P        | CTAGE13P        | 0.00213668         | 0.000309226                  | 13.4732                          | 13.4732                           | NC+MYCN up vs NC-CTRL                         | 12.5777      | 0.0123441     | 0.00261713  | 1        |
| 1567 | HES7            | HES7            | 0.000630776        | 0.000157272                  | 14.218                           | 14.218                            | NC+MYCN up vs NC-CTRL                         | 18.1251      | 34.8322       | 5.12471     | 1        |
| 1568 | MEIOB           | MEIOB           | 5.15E-05           | 1.56E-05                     | 15.077                           | 15.077                            | NC+MYCN up vs NC-CTRL                         | 36.4855      | 3.64906       | 0.266704    | 1        |
| 1569 | TMEM132E        | TMEM132E        | 0.0131409          | 0.00489166                   | 16.0591                          | 16.0591                           | NC+MYCN up vs NC-CTRL                         | 6.89052      | 2.79544       | 1.08185     | 1        |
| 1570 | RP11-909N17.3   | RP11-909N17.3   | 0.00177496         | 0.000652746                  | 16.3098                          | 16.3098                           | NC+MYCN up vs NC-CTRL                         | 13.3163      | 1.75067       | 0.350584    | 1        |
| 1571 | AC005682.6      | AC005682.6      | 0.00982693         | 0.00218179                   | 16.3268                          | 16.3268                           | NC+MYCN up vs NC-CTRL                         | 7.63739      | 0.120064      | 0.0419214   | 1        |
| 1572 | RP11-503C24.6   | RP11-503C24.6   | 0.000975724        | 0.000403316                  | 17.3203                          | 17.3203                           | NC+MYCN up vs NC-CTRL                         | 15.9454      | 0.0136182     | 0.00227748  | 1        |
| 1573 | ALOXE3          | ALOXE3          | 0.0167701          | 0.00593079                   | 17.5193                          | 17.5193                           | NC+MYCN up vs NC-CTRL                         | 6.30377      | 0.0257339     | 0.0108862   | 1        |
| 1574 | FIBCD1          | FIBCD1          | 0.0161846          | 0.00621817                   | 18.3063                          | 18.3063                           | NC+MYCN up vs NC-CTRL                         | 6.3871       | 0.00680045    | 0.00283924  | 1        |
| 1575 | TLX1            | TLX1            | 0.000955056        | 0.000271488                  | 19.1                             | 19.1                              | NC+MYCN up vs NC-CTRL                         | 16.0469      | 0.157074      | 0.0261025   | 1        |
| 1576 | RP11-109N23.6   | RP11-109N23.6   | 0.000202679        | 4.37E-05                     | 19.3673                          | 19.3673                           | NC+MYCN up vs NC-CTRL                         | 25.0467      | 1.11846       | 0.11908     | 1        |
| 1577 | RPRML           | RPRML           | 0.000547118        | 0.000128049                  | 20.064                           | 20.064                            | NC+MYCN up vs NC-CTRL                         | 18.8889      | 2.22496       | 0.314111    | 1        |
| 1578 | RP3-366N23.4    | RP3-366N23.4    | 0.00621264         | 0.000874862                  | 22.3905                          | 22.3905                           | NC+MYCN up vs NC-CTRL                         | 8.93075      | 0.321794      | 0.0960857   | 1        |
| 1579 | RASGRP3         | RASGRP3         | 0.00219125         | 0.000536518                  | 22.4072                          | 22.4072                           | NC+MYCN up vs NC-CTRL                         | 12.4799      | 0.435366      | 0.0930276   | 1        |
| 1580 | IRF8            | IRF8            | 0.0151286          | 0.00552617                   | 26.51                            | 26.51                             | NC+MYCN up vs NC-CTRL                         | 6.54733      | 0.00800625    | 0.00326087  | 1        |
| 1581 | MYCN            | MYCN            | 1.15E-05           | 3.02E-06                     | 26.5271                          | 26.5271                           | NC+MYCN up vs NC-CTRL                         | 54.4577      | 1.97E+06      | 96616.5     | 1        |
| 1582 | RP11-93B14.5    | RP11-93B14.5    | 0.0227871          | 0.00480576                   | 28.5176                          | 28.5176                           | NC+MYCN up vs NC-CTRL                         | 5.61436      | 0.165517      | 0.0786162   | 1        |
| 1583 | KIAA1211L       | KIAA1211L       | 0.00584165         | 0.00148257                   | 29.7586                          | 29.7586                           | NC+MYCN up vs NC-CTRL                         | 9.11589      | 0.0456289     | 0.0133478   | 1        |
| 1584 | RP11-855A2.5    | RP11-855A2.5    | 0.00790556         | 0.00284752                   | 33.5754                          | 33.5754                           | NC+MYCN up vs NC-CTRL                         | 8.23275      | 2.01191       | 0.651677    | 1        |
| 1585 | SRL             | SRL             | 0.02334            | 0.00781932                   | 93.4889                          | 93.4889                           | NC+MYCN up vs NC-CTRL                         | 5.56261      | 103.869       | 49.7938     | 1        |
| 1586 | XXyac-YX155B6.7 | XXyac-YX155B6.7 | 0.022945           | 0.00570888                   | 2.57E+06                         | 2.57E+06                          | NC+MYCN up vs NC-CTRL                         | 5.59943      | 0.0433211     | 0.0206312   | 1        |
| 1587 | RP13-131K19.2   | RP13-131K19.2   | 0.00342463         | 0.0110419                    | 2.34E+07                         | 2.34E+07                          | NC+MYCN up vs NC-CTRL                         | 10.8461      | 0.417952      | 0.10276     | 1        |
